# Supplementary material
Source: Research Square preprint supplement (doi:10.21203/rs.3.rs-9186301/v1)
Supplement: Supplementary file 1 [file 2955ea7b4e6814ca2c2149da.xlsx]

## Sheet: ASSESSING THE CONTRIBUTION O...
start	end	Age	Marital status	Highest level of education	Occupation	Religion	Place of residence	Have you heard of IMSHIA?	If yes how did you first hear about it?	Are you currently enrolled in IMSHIA?	If yes, who paid for your enrollment?	Do you know the maternal health services IMSHIA covers?	If yes, which ones?	If yes, which ones?/Antenatal care	If yes, which ones?/Skilled delivery	If yes, which ones?/Emergency obstetric care	If yes, which ones?/Postnatal care	If yes, which ones?/Others	Did you attend antenatal care during your last pregnancy?	If yes, how many visits?	Did IMSHIA cover your ANC costs?	Where did you deliver your last baby?	Was your delivery attended by a skilled health worker?	Was the cost of delivery covered by IMSHIA?	Did you receive postnatal care?	What challenges have you faced in using IMSHIA maternal health services?	What challenges have you faced in using IMSHIA maternal health services?/Lack of awareness	What challenges have you faced in using IMSHIA maternal health services?/Distance to facility	What challenges have you faced in using IMSHIA maternal health services?/Transport cost	What challenges have you faced in using IMSHIA maternal health services?/Negative attitude of health workers	What challenges have you faced in using IMSHIA maternal health services?/Stock out of medicine	What challenges have you faced in using IMSHIA maternal health services?/Cultural preference for home delivery	What challenges have you faced in using IMSHIA maternal health services?/Others	What can be done to improve women’s use of IMSHIA services?	Overall, how satisfied are you with IMSHIA maternal services?	Do you believe IMSHIA has reduced financial hardship for maternal care?	Would you recommend IMSHIA to other women?	Any additional comments or suggestions?	_id	_uuid	_submission_time	_validation_status	_notes	_status	_submitted_by	__version__	_tags	meta/rootUuid	_index
2025-10-22 11:24:47	2025-10-22 11:26:06	19	Single	Secondary	Nothing	Christianity	Rural	Yes	Health facility	Yes	Government subsidy	Yes	Antenatal care Skilled delivery	1	1	0	0	0	Yes	7	Fully	Health center	Yes	Fully	Yes										Very satisfied	Yes	Yes		588122050	4d4912fc-6671-44f5-85d6-0012231e3703	2025-10-22 10:26:08			submitted_via_web		vjPvJRHBMydrYcpAtB4ohd		uuid:4d4912fc-6671-44f5-85d6-0012231e3703	1
2025-10-22 22:35:19	2025-10-22 22:40:33	29	Single	Tertiary	Farmer	Christianity	Rural	Yes	Health facility	Yes	Employer	Yes	Antenatal care Skilled delivery Emergency obstetric care Postnatal care	1	1	1	1	0	Yes	4	Fully	Health center	Yes	Fully	Yes	Distance to facility Transport cost	0	1	1	0	0	0	0	More enlightenment and more facilities added	Very satisfied	Yes	Yes	No	588650014	49de8661-1e04-4a7a-8213-12634eb425ef	2025-10-22 21:40:39			submitted_via_web		vjPvJRHBMydrYcpAtB4ohd		uuid:49de8661-1e04-4a7a-8213-12634eb425ef	2
2025-10-22 22:40:34	2025-10-22 22:42:50	35	Married	Secondary	House wife	Christianity	Rural	Yes	Health facility	Yes	Government subsidy	Yes	Antenatal care Skilled delivery Emergency obstetric care Others	1	1	1	0	1	Yes	3	Fully	Health center	Yes	Fully	Yes	Transport cost	0	0	1	0	0	0	0	Create awareness	Very satisfied	Yes	Yes	Service others too	588650804	119acb71-7a1f-4490-b8ef-2c80dda2ad40	2025-10-22 21:42:51			submitted_via_web		vjPvJRHBMydrYcpAtB4ohd		uuid:119acb71-7a1f-4490-b8ef-2c80dda2ad40	3
2025-10-22 22:42:50	2025-10-22 22:44:58	37	Married	Tertiary	Farmer	Christianity	Rural	Yes	Health facility	Yes	Government subsidy	Yes	Antenatal care Skilled delivery Postnatal care	1	1	0	1	0	Yes	5	Fully	Health center	Yes	Fully	Yes	Others	0	0	0	0	0	0	1	Food provision	Satisfied	Yes	Yes	God help them to do better better	588651616	fa406219-6db2-4570-a4b7-e31982ea1415	2025-10-22 21:44:58			submitted_via_web		vjPvJRHBMydrYcpAtB4ohd		uuid:fa406219-6db2-4570-a4b7-e31982ea1415	4
2025-10-22 22:44:58	2025-10-22 22:46:50	36	Married	Secondary	Fashion designer	Christianity	Rural	Yes	Health facility	Yes	Government subsidy	Yes	Antenatal care Skilled delivery Postnatal care	1	1	0	1	0	Yes	5	Fully	Health center	Yes	Fully	Yes	Others	0	0	0	0	0	0	1	Food provision	Satisfied	Yes	Yes	God bless	588652172	22614f5a-e192-4c87-951d-1946586c45a8	2025-10-22 21:46:51			submitted_via_web		vjPvJRHBMydrYcpAtB4ohd		uuid:22614f5a-e192-4c87-951d-1946586c45a8	5
2025-10-22 22:46:50	2025-10-22 22:48:38	31	Married	Secondary	Business	Christianity	Rural	Yes	Health facility	Yes	Government subsidy	Yes	Antenatal care Skilled delivery Postnatal care	1	1	0	1	0	Yes	8	Fully	Health center	Yes	Fully	Yes	Others	0	0	0	0	0	0	1	Food provision	Satisfied	Yes	Yes	God bless	588652755	79623367-0f0e-4442-b207-e9dab6ce3fa6	2025-10-22 21:48:40			submitted_via_web		vjPvJRHBMydrYcpAtB4ohd		uuid:79623367-0f0e-4442-b207-e9dab6ce3fa6	6
2025-10-22 22:48:38	2025-10-22 22:50:20	28	Married	Secondary		Christianity	Rural	Yes	Health facility	Yes	Government subsidy	Yes	Antenatal care Emergency obstetric care Postnatal care	1	0	1	1	0	Yes	7	Fully	Health center	Yes	Fully	Yes	Others	0	0	0	0	0	0	1	Funds	Satisfied	Yes	Yes	Abundant blessings	588653317	94e9db07-2f9c-4d3d-aa45-85b15fba25c9	2025-10-22 21:50:21			submitted_via_web		vjPvJRHBMydrYcpAtB4ohd		uuid:94e9db07-2f9c-4d3d-aa45-85b15fba25c9	7
2025-10-22 22:50:20	2025-10-22 22:52:48	35	Divorced/Separated	Tertiary	Trading	Islam	Rural	Yes	Friends/family	Yes	Government subsidy	Yes	Skilled delivery Emergency obstetric care Postnatal care Others	0	1	1	1	1	Yes	10	Fully	Others	Yes	Fully	Yes	Transport cost Stock out of medicine	0	0	1	0	1	0	0	Bring doctors to hospitals	Very satisfied	Yes	Yes	Keep up the good work	588654150	eba5f954-5ec7-45cd-9ac5-b997a80542d5	2025-10-22 21:52:49			submitted_via_web		vjPvJRHBMydrYcpAtB4ohd		uuid:eba5f954-5ec7-45cd-9ac5-b997a80542d5	8
2025-10-22 22:52:48	2025-10-22 22:55:27	27	Married	Tertiary	Hair stylist	Christianity	Rural	Yes	Friends/family	No		Yes	Antenatal care Skilled delivery Emergency obstetric care Postnatal care Others	1	1	1	1	1	Yes	10	Fully	Health center	Yes	Fully	Yes	Distance to facility Transport cost Stock out of medicine	0	1	1	0	1	0	0	Provide more drugs and create more awareness	Very satisfied	Yes	Yes	Continue their good work	588654697	7ae3cc47-6a9d-4e4f-b5d4-00b694398d3a	2025-10-22 21:55:28			submitted_via_web		vjPvJRHBMydrYcpAtB4ohd		uuid:7ae3cc47-6a9d-4e4f-b5d4-00b694398d3a	9
2025-10-22 22:55:27	2025-10-22 22:57:50	29	Married	Secondary	Trading(Medicine dealer)	Christianity	Rural	Yes	Health facility	No		Yes	Antenatal care Skilled delivery Emergency obstetric care Postnatal care Others	1	1	1	1	1	Yes	5	Fully	Health center	Yes	Fully	Yes	Stock out of medicine	0	0	0	0	1	0	0	Provide more health workers	Very satisfied	Yes	Yes	Extend the service up to five times	588655341	1a6b785d-5169-46eb-8e3a-00010214db75	2025-10-22 21:57:51			submitted_via_web		vjPvJRHBMydrYcpAtB4ohd		uuid:1a6b785d-5169-46eb-8e3a-00010214db75	10
2025-10-22 22:57:50	2025-10-22 23:01:13	35	Married	Secondary	Trader	Christianity	Rural			Yes	Government subsidy	Yes	Antenatal care Skilled delivery Emergency obstetric care Postnatal care Others	1	1	1	1	1	Yes	12	Fully	Others	Yes	Fully	Yes	Distance to facility Transport cost	0	1	1	0	0	0	0	Create more awareness	Very satisfied	Yes	Yes	Extend the programme still 5 years	588656368	11d772f5-a141-403c-9282-d1b8e678facf	2025-10-22 22:01:14			submitted_via_web		vjPvJRHBMydrYcpAtB4ohd		uuid:11d772f5-a141-403c-9282-d1b8e678facf	11
2025-10-22 23:01:13	2025-10-22 23:03:05	27	Married	Secondary	Business	Christianity	Rural	Yes	Health facility	Yes	Government subsidy	Yes	Antenatal care Skilled delivery	1	1	0	0	0	Yes	2	Fully	Health center	Yes	Fully	Yes	Others	0	0	0	0	0	0	1	Include more services	Very satisfied	Yes	Yes	Continue the programme	588656822	5572ebac-5421-4034-8f19-56155c39b918	2025-10-22 22:03:09			submitted_via_web		vjPvJRHBMydrYcpAtB4ohd		uuid:5572ebac-5421-4034-8f19-56155c39b918	12
2025-10-22 23:03:05	2025-10-22 23:11:40	27	Married	No formal education	Farmer	Islam	Urban	Yes	Health facility	Yes	Government subsidy	Yes	Antenatal care	1	0	0	0	0	Yes	13	Partially	Health center	Yes	Fully	Yes	Distance to facility	0	1	0	0	0	0	0		Neutral	Yes	Yes	No	588659035	c110ad8f-5c4a-4d01-a101-9d899924f38d	2025-10-22 22:11:43			submitted_via_web		vjPvJRHBMydrYcpAtB4ohd		uuid:c110ad8f-5c4a-4d01-a101-9d899924f38d	13
2025-10-22 23:11:41	2025-10-22 23:13:09	28		Secondary		Christianity	Rural	Yes	Health facility	Yes	Government subsidy	Yes	Antenatal care	1	0	0	0	0	Yes	14	Fully	Health center	Yes	Partially	Yes	Distance to facility	0	1	0	0	0	0	0		Neutral	Yes	Yes	No	588659447	bf54a140-8746-4292-96dd-e91b07ffd288	2025-10-22 22:13:10			submitted_via_web		vjPvJRHBMydrYcpAtB4ohd		uuid:bf54a140-8746-4292-96dd-e91b07ffd288	14
2025-10-22 23:13:09	2025-10-22 23:14:39	24	Married	Secondary	House wife	Christianity	Urban	Yes	Radio/TV	Yes	Government subsidy	Yes	Postnatal care	0	0	0	1	0	Yes	12	Fully	Health center	Yes	Fully	Yes	Transport cost	0	0	1	0	0	0	0		Neutral	Yes	Yes	No	588659799	710eb508-3036-421f-a33d-99f85d58c41b	2025-10-22 22:14:40			submitted_via_web		vjPvJRHBMydrYcpAtB4ohd		uuid:710eb508-3036-421f-a33d-99f85d58c41b	15
2025-10-22 23:14:39	2025-10-22 23:16:06	20	Married	Primary	No occupation	Christianity	Rural	Yes	Health facility	Yes	Government subsidy	Yes	Antenatal care	1	0	0	0	0	Yes	11	Fully	Health center	Yes	Fully	Yes	Distance to facility	0	1	0	0	0	0	0		Very satisfied	Yes	Yes	No	588660129	a31f6765-5dd2-4d70-bda4-b3813aec3b2e	2025-10-22 22:16:07			submitted_via_web		vjPvJRHBMydrYcpAtB4ohd		uuid:a31f6765-5dd2-4d70-bda4-b3813aec3b2e	16
2025-10-22 23:16:06	2025-10-22 23:17:44	25	Married	Tertiary	Teacher	Christianity	Rural			Yes	Spouse/family	Yes	Antenatal care	1	0	0	0	0	Yes	18	Fully	Health center	Yes	Fully	Yes	Transport cost	0	0	1	0	0	0	0		Very satisfied	Yes	Yes	No	588660469	25c7f4af-6295-4c94-a0dd-7fb2723d8501	2025-10-22 22:17:45			submitted_via_web		vjPvJRHBMydrYcpAtB4ohd		uuid:25c7f4af-6295-4c94-a0dd-7fb2723d8501	17
2025-10-22 23:17:44	2025-10-22 23:20:04	29	Married	Secondary	Farmer	Christianity	Rural	Yes	Health facility	Yes	Government subsidy	Yes	Antenatal care	1	0	0	0	0	Yes	12	Fully	Health center	Yes	Fully	Yes	Distance to facility	0	1	0	0	0	0	0		Very satisfied	Yes	Yes	No	588660981	0f4c0c99-698d-4a7e-b8ed-99943f56ef7b	2025-10-22 22:20:05			submitted_via_web		vjPvJRHBMydrYcpAtB4ohd		uuid:0f4c0c99-698d-4a7e-b8ed-99943f56ef7b	18
2025-10-22 23:20:04	2025-10-22 23:21:49	22		Secondary	Hairstyles	Christianity	Rural	Yes	Health facility	Yes	Government subsidy	Yes	Postnatal care	0	0	0	1	0	Yes	10	Fully	Health center	Yes	Fully	Yes	Distance to facility	0	1	0	0	0	0	0		Satisfied	Yes	Yes	No	588661272	04218357-44a0-4a56-b54c-3525e23831cb	2025-10-22 22:21:50			submitted_via_web		vjPvJRHBMydrYcpAtB4ohd		uuid:04218357-44a0-4a56-b54c-3525e23831cb	19
2025-10-22 23:21:49	2025-10-22 23:23:29	17		Secondary	Business woman	Christianity	Rural	Yes	Health facility	Yes	Government subsidy								Yes	9	Fully	Health center	Yes	Partially		Distance to facility	0	1	0	0	0	0	0		Satisfied	Yes	Yes	No	588661642	aa1febfd-1b97-4a31-a704-e88c9aeecfc8	2025-10-22 22:23:29			submitted_via_web		vjPvJRHBMydrYcpAtB4ohd		uuid:aa1febfd-1b97-4a31-a704-e88c9aeecfc8	20
2025-10-22 23:23:29	2025-10-22 23:24:46	19	Single	Secondary	Student	Christianity	Rural	Yes	Health facility	Yes	Government subsidy								Yes	40	Fully	Health center	Yes	Fully	Yes	Distance to facility Transport cost	0	1	1	0	0	0	0		Neutral	Yes	Yes	No	588661999	813ad0f6-0a66-4054-9596-42d71d3996a9	2025-10-22 22:24:48			submitted_via_web		vjPvJRHBMydrYcpAtB4ohd		uuid:813ad0f6-0a66-4054-9596-42d71d3996a9	21
2025-10-22 23:24:47	2025-10-22 23:26:17	38	Married	Tertiary	Business.ess woman	Christianity	Rural	Yes	Health facility	Yes	Government subsidy	Yes	Antenatal care Postnatal care	1	0	0	1	0	Yes	10	Fully	Health center	Yes	Fully		Lack of awareness	1	0	0	0	0	0	0		Neutral	Yes	Yes		588662366	ba270f7c-0d3a-44f4-b0da-d93e962f453e	2025-10-22 22:26:18			submitted_via_web		vjPvJRHBMydrYcpAtB4ohd		uuid:ba270f7c-0d3a-44f4-b0da-d93e962f453e	22
2025-10-22 11:26:06	2025-10-23 04:18:45	19	Single	Secondary	Nothing	Christianity	Rural	Yes	Health facility	Yes	Government subsidy	Yes	Antenatal care Skilled delivery	1	1	0	0	0	Yes	4	Fully	Health center	Yes	Fully	Yes										Satisfied	Yes	Yes		588741658	1009ea16-e743-4850-9e9c-5aad0860ad11	2025-10-23 03:18:48			submitted_via_web		vjPvJRHBMydrYcpAtB4ohd		uuid:1009ea16-e743-4850-9e9c-5aad0860ad11	23
2025-10-23 04:18:45	2025-10-23 04:21:40	28	Married	Tertiary	Public servant	Christianity	Rural	Yes	Community leader	Yes	Government subsidy	Yes	Antenatal care Skilled delivery	1	1	0	0	0	Yes	5	Partially	General hospital	Yes	Partially	Yes	Lack of awareness	1	0	0	0	0	0	0	Creating more awareness	Very satisfied	Yes	Yes	God bless the government and all the IMSHIA team for making it workout in imo state and promoting healthy maternal service	588742547	38d68784-a76c-43b2-87a3-c27b6fbb884b	2025-10-23 03:21:42			submitted_via_web		vjPvJRHBMydrYcpAtB4ohd		uuid:38d68784-a76c-43b2-87a3-c27b6fbb884b	24
2025-10-23 04:21:40	2025-10-23 04:23:41	34	Divorced/Separated	Tertiary	Civil servant	Islam	Urban	Yes	Community leader	Yes	Self	Yes	Antenatal care Skilled delivery Emergency obstetric care Postnatal care	1	1	1	1	0	Yes	24	Partially	Others	Yes	Partially	Yes									Advertisement and awareness creation	Very satisfied	Yes	Yes	God bless you Government send. Hope Uzodimma	588743231	74c013e8-b92b-46c6-a68e-86e1610a7969	2025-10-23 03:23:45			submitted_via_web		vjPvJRHBMydrYcpAtB4ohd		uuid:74c013e8-b92b-46c6-a68e-86e1610a7969	25
2025-10-23 04:23:41	2025-10-23 04:27:33	32	Divorced/Separated	Tertiary	Unemployed	Christianity	Rural	Yes	Friends/family	Yes	Government subsidy	Yes	Antenatal care Skilled delivery Emergency obstetric care	1	1	1	0	0	Yes		Fully	Others	Yes	Fully	Yes									Health talk to rural areas, creating awareness, educating ok the need and use of IMSHIA service	Very satisfied	Yes	Yes	IMSHIA is a financial life saver. I am thankful to IMSHIA God bless you and I suggest awareness to the leas privilege people to take part	588744847	d3b10712-13f9-4889-ba75-78ed751091d8	2025-10-23 03:27:35			submitted_via_web		vjPvJRHBMydrYcpAtB4ohd		uuid:d3b10712-13f9-4889-ba75-78ed751091d8	26
2025-10-23 04:27:33	2025-10-23 04:29:30	32	Married	Tertiary	Self employed	Christianity	Rural	Yes	Friends/family	Yes	Spouse/family	Yes	Antenatal care Skilled delivery Emergency obstetric care Postnatal care	1	1	1	1	0	Yes	18	Fully	Others	Yes	Fully	Yes	Lack of awareness	1	0	0	0	0	0	0	Creating awareness in rural areas through the health center	Very satisfied	Yes	No		588745722	9f3c7704-51cc-4d77-b69a-8e906044d16e	2025-10-23 03:29:32			submitted_via_web		vjPvJRHBMydrYcpAtB4ohd		uuid:9f3c7704-51cc-4d77-b69a-8e906044d16e	27
2025-10-23 04:29:30	2025-10-23 04:31:15	24	Married	Tertiary	Trader	Christianity	Rural	Yes	Health facility	Yes	Government subsidy	Yes	Antenatal care Skilled delivery Emergency obstetric care Postnatal care	1	1	1	1	0	Yes	22	Fully	Health center	Yes	Fully	Yes	Lack of awareness	1	0	0	0	0	0	0	Going to the rural areas and sensitize the women about IMSHIA	Very satisfied	Yes	Yes	Thanks to the government and all the organizers of IMSHIA	588746383	ac7c6d14-ad4f-43ba-88a3-e2d81dd56811	2025-10-23 03:31:18			submitted_via_web		vjPvJRHBMydrYcpAtB4ohd		uuid:ac7c6d14-ad4f-43ba-88a3-e2d81dd56811	28
2025-10-23 04:31:15	2025-10-23 04:32:28	26	Married	Tertiary	Private worker	Christianity	Urban	Yes	Radio/TV	Yes	Employer	Yes	Antenatal care Skilled delivery Emergency obstetric care Postnatal care	1	1	1	1	0	Yes	17	Partially	Others	Yes	Partially	Yes	Lack of awareness Transport cost	1	0	1	0	0	0	0	Advertise more about IMSHIA	Very satisfied	Yes	Yes		588746851	370ea414-a5c8-47b4-8412-410df14a44f1	2025-10-23 03:32:30			submitted_via_web		vjPvJRHBMydrYcpAtB4ohd		uuid:370ea414-a5c8-47b4-8412-410df14a44f1	29
2025-10-23 04:32:28	2025-10-23 04:33:33	27	Married	Tertiary	Business woman	Christianity	Urban	Yes	Friends/family	Yes	Self	Yes	Antenatal care	1	0	0	0	0	Yes	16	Fully	Others	Yes	Fully	Yes	Distance to facility	0	1	0	0	0	0	0	Creat more awareness	Satisfied	Yes	Yes		588747089	189908c1-383e-466b-a768-c3d2d7c6cc79	2025-10-23 03:33:36			submitted_via_web		vjPvJRHBMydrYcpAtB4ohd		uuid:189908c1-383e-466b-a768-c3d2d7c6cc79	30
2025-10-23 04:33:33	2025-10-23 04:35:53	32	Married	Tertiary	Artist	Christianity	Rural	Yes	Radio/TV	Yes	Government subsidy	Yes	Antenatal care Skilled delivery Emergency obstetric care Postnatal care	1	1	1	1	0	Yes	14	Partially	Others	Yes	Fully	Yes	Others	0	0	0	0	0	0	1	More enlightenment and creating more awareness	Very satisfied	Yes	Yes	Am grateful to IMSHIA for the good work they have done and I pray almighty God to give them more financial open door to help others	588747766	67803eb9-3c41-45ba-953f-1ec493829097	2025-10-23 03:35:55			submitted_via_web		vjPvJRHBMydrYcpAtB4ohd		uuid:67803eb9-3c41-45ba-953f-1ec493829097	31
2025-10-23 04:35:53	2025-10-23 04:37:10	30	Married	Tertiary	Administrator	Christianity	Urban	Yes	Health facility	Yes	Self	Yes	Antenatal care Skilled delivery Emergency obstetric care Postnatal care	1	1	1	1	0	Yes	9	Fully	Others	Yes	Fully	Yes	Lack of awareness Transport cost	1	0	1	0	0	0	0	Awareness creation	Very satisfied	Yes	Yes	Creat more awareness	588748109	e7577f82-2aa0-4d7e-81d3-072046ec7832	2025-10-23 03:37:12			submitted_via_web		vjPvJRHBMydrYcpAtB4ohd		uuid:e7577f82-2aa0-4d7e-81d3-072046ec7832	32
2025-10-23 04:37:10	2025-10-23 04:38:16	25	Married	Tertiary	Student	Christianity	Urban	Yes	Friends/family	Yes	Spouse/family	Yes	Antenatal care Skilled delivery Emergency obstetric care Postnatal care	1	1	1	1	0	Yes	16	Partially	Others	Yes	Partially	Yes	Distance to facility Transport cost	0	1	1	0	0	0	0	Sensitization	Satisfied	Yes	Yes		588748458	7ae454e6-72e7-42a8-ab87-f174619a3e76	2025-10-23 03:38:19			submitted_via_web		vjPvJRHBMydrYcpAtB4ohd		uuid:7ae454e6-72e7-42a8-ab87-f174619a3e76	33
2025-10-23 04:38:17	2025-10-23 04:39:15	28	Married	Secondary	Trading	Islam	Rural	Yes	Friends/family	Yes	Government subsidy	Yes	Antenatal care Skilled delivery Emergency obstetric care Postnatal care	1	1	1	1	0	Yes	2	Fully	Health center	Yes	Fully	Yes										Very satisfied	Yes	Yes		588748822	8a4235c0-0275-4762-a608-ec89b379ed55	2025-10-23 03:39:18			submitted_via_web		vjPvJRHBMydrYcpAtB4ohd		uuid:8a4235c0-0275-4762-a608-ec89b379ed55	34
2025-10-23 04:39:15	2025-10-23 04:40:33	17	Single	Secondary		Christianity	Urban	Yes	Friends/family	Yes	Employer	Yes	Antenatal care Skilled delivery Postnatal care	1	1	0	1	0	Yes	7	Fully	General hospital	Yes	Fully	Yes	Distance to facility	0	1	0	0	0	0	0	Create more awareness especially in rural areas	Very satisfied	Yes	Yes	None	588749344	a10ff71c-4bef-4e43-a608-291db35964ed	2025-10-23 03:40:35			submitted_via_web		vjPvJRHBMydrYcpAtB4ohd		uuid:a10ff71c-4bef-4e43-a608-291db35964ed	35
2025-10-23 04:40:33	2025-10-23 04:41:56	36	Divorced/Separated	Tertiary	Staff of immaculate heart hospital	Islam	Rural	Yes	Friends/family	Yes	Self	No							Yes	3	Fully	Others	Yes	Fully	Yes	Lack of awareness	1	0	0	0	0	0	0		Satisfied	Yes	Yes	Nothing but continue doing the needful to us and God blessings abead amen	588749822	a592b238-348c-4e5b-b141-6ec02ae28262	2025-10-23 03:41:58			submitted_via_web		vjPvJRHBMydrYcpAtB4ohd		uuid:a592b238-348c-4e5b-b141-6ec02ae28262	36
2025-10-23 04:41:56	2025-10-23 04:43:12	25	Divorced/Separated	Tertiary	Trading	Christianity	Rural	Yes	Health facility	Yes	Self	Yes	Antenatal care Skilled delivery Postnatal care	1	1	0	1	0	Yes	4	Fully	Health center	Yes	Fully	Yes	Transport cost	0	0	1	0	0	0	0	More skilled health workers are needed	Satisfied	Yes	Yes		588750199	b0b3e5e0-4ff4-4ba0-b56a-ffd722868961	2025-10-23 03:43:14			submitted_via_web		vjPvJRHBMydrYcpAtB4ohd		uuid:b0b3e5e0-4ff4-4ba0-b56a-ffd722868961	37
2025-10-23 04:43:12	2025-10-23 04:44:32	19	Married	Secondary	House wife	Christianity	Urban	Yes	Health facility	Yes	Government subsidy	Yes	Antenatal care Skilled delivery	1	1	0	0	0	Yes	4		Health center	Yes	Fully	Yes	Distance to facility Transport cost	0	1	1	0	0	0	0	More staff the the health center	Very satisfied	Yes	Yes	They done much	588750574	128cb9ed-3c44-43e2-8f5f-0003bdc4905f	2025-10-23 03:44:34			submitted_via_web		vjPvJRHBMydrYcpAtB4ohd		uuid:128cb9ed-3c44-43e2-8f5f-0003bdc4905f	38
2025-10-23 04:44:32	2025-10-23 04:45:49	23	Married	Secondary	Trading	Christianity	Rural	Yes	Health facility	Yes	Self	Yes	Skilled delivery Emergency obstetric care Postnatal care	0	1	1	1	0	Yes	5	Partially	Health center	Yes	Fully	Yes	Distance to facility Transport cost	0	1	1	0	0	0	0	More staff to the health center	Very satisfied	Yes	Yes	They have done much	588751045	7f275c65-10da-46e2-a399-7edd70e82425	2025-10-23 03:45:52			submitted_via_web		vjPvJRHBMydrYcpAtB4ohd		uuid:7f275c65-10da-46e2-a399-7edd70e82425	39
2025-10-23 04:45:50	2025-10-23 04:47:12	24	Married	Secondary	Srmistress	Christianity	Urban	Yes	Health facility	Yes	Government subsidy	Yes	Emergency obstetric care	0	0	1	0	0	Yes	4	Fully	Health center	Yes	Fully	Yes	Distance to facility Transport cost Others	0	1	1	0	0	0	1		Very satisfied	Yes	Yes	More grace to their elbow	588751503	5c39dc5e-ee19-4030-a2b6-a3c6f2284ea6	2025-10-23 03:47:14			submitted_via_web		vjPvJRHBMydrYcpAtB4ohd		uuid:5c39dc5e-ee19-4030-a2b6-a3c6f2284ea6	40
2025-10-23 04:47:12	2025-10-23 04:47:56	51	Single	Secondary	Nurs	Christianity	Rural	Yes	Health facility	Yes	Self	Yes																							Very satisfied	Yes	Yes		588751727	0b6b5552-50b6-458c-b0ae-83e550cd4aa8	2025-10-23 03:47:58			submitted_via_web		vjPvJRHBMydrYcpAtB4ohd		uuid:0b6b5552-50b6-458c-b0ae-83e550cd4aa8	41
2025-10-23 04:47:57	2025-10-23 04:48:57	39	Married	Secondary	Farmer	Christianity	Rural	Yes	Health facility	Yes	Government subsidy								Yes	6	Partially	Others	Yes	Partially	Yes	Others	0	0	0	0	0	0	1	None	Satisfied	Yes	Yes		588752188	f30b09ed-b5a1-4412-8e31-b96f5884579f	2025-10-23 03:48:59			submitted_via_web		vjPvJRHBMydrYcpAtB4ohd		uuid:f30b09ed-b5a1-4412-8e31-b96f5884579f	42
2025-10-23 04:48:57	2025-10-23 04:50:09	34		Secondary	Trading	Others	Rural	Yes	Health facility	Yes	Government subsidy	Yes	Skilled delivery Emergency obstetric care	0	1	1	0	0	Yes	2	Fully	Health center	Yes	Fully	Yes	Distance to facility Negative attitude of health workers	0	1	0	1	0	0	0	More staff	Very satisfied	Yes	Yes	God bless them	588752655	7598f9a5-70d7-4614-91ab-6e0d3a558b08	2025-10-23 03:50:11			submitted_via_web		vjPvJRHBMydrYcpAtB4ohd		uuid:7598f9a5-70d7-4614-91ab-6e0d3a558b08	43
2025-10-23 04:50:09	2025-10-23 04:51:25	35	Married	Secondary	Trading	Christianity	Rural	Yes	Health facility	Yes	Government subsidy	Yes	Antenatal care Skilled delivery Emergency obstetric care Postnatal care Others	1	1	1	1	1	Yes	4	Fully	Health center	Yes	Fully	Yes	Transport cost	0	0	1	0	0	0	0	Insensitive	Satisfied	Yes	Yes	None	588753158	9ccb693f-19db-4760-80ff-fa662001f1ee	2025-10-23 03:51:27			submitted_via_web		vjPvJRHBMydrYcpAtB4ohd		uuid:9ccb693f-19db-4760-80ff-fa662001f1ee	44
2025-10-23 04:51:25	2025-10-23 04:53:00	25	Married	Secondary	Trading	Islam	Rural	Yes	Health facility	Yes	Government subsidy	Yes	Antenatal care Skilled delivery Emergency obstetric care Postnatal care	1	1	1	1	0	Yes	8	Fully	Health center		Fully	Yes									Their service was okay	Very satisfied	Yes	Yes	No	588753762	72a0136d-08ab-4eea-ac42-2629281716bc	2025-10-23 03:53:02			submitted_via_web		vjPvJRHBMydrYcpAtB4ohd		uuid:72a0136d-08ab-4eea-ac42-2629281716bc	45
2025-10-23 04:53:00	2025-10-23 04:54:11	30	Divorced/Separated	Tertiary	Trading	Christianity	Rural	Yes	Health facility	Yes	Government subsidy	Yes	Antenatal care Skilled delivery Emergency obstetric care Postnatal care	1	1	1	1	0	Yes	12	Fully		Yes	Fully	Yes	Others	0	0	0	0	0	0	1	Service rendered was ok	Very satisfied	Yes	Yes	No	588754110	e303df61-e883-43d7-afab-f904c28075cf	2025-10-23 03:54:14			submitted_via_web		vjPvJRHBMydrYcpAtB4ohd		uuid:e303df61-e883-43d7-afab-f904c28075cf	46
2025-10-23 04:54:12	2025-10-23 04:55:30	30	Married	Secondary	Trading	Christianity	Rural	Yes	Health facility	Yes	Government subsidy	Yes	Antenatal care Skilled delivery Emergency obstetric care Postnatal care	1	1	1	1	0	Yes	4	Fully	Health center	Yes	Fully	Yes	Lack of awareness	1	0	0	0	0	0	0	Enough mobilization	Very satisfied	Yes	Yes	Thank you IMSHIA	588754464	4a00310f-5722-4e4d-9f69-aec518f36139	2025-10-23 03:55:33			submitted_via_web		vjPvJRHBMydrYcpAtB4ohd		uuid:4a00310f-5722-4e4d-9f69-aec518f36139	47
2025-10-23 04:55:31	2025-10-23 04:56:54	36	Married	Tertiary	Trading	Christianity	Rural	Yes	Health facility	Yes	Government subsidy	Yes	Antenatal care Skilled delivery Emergency obstetric care Postnatal care	1	1	1	1	0	Yes	8	Fully	Health center	Yes	Fully	Yes	Others	0	0	0	0	0	0	1	More sensitization	Very satisfied	Yes	Yes	Kudos to IMSHIA	588754682	4c136bdd-f7fd-4412-ab6a-6fb2e102e507	2025-10-23 03:56:56			submitted_via_web		vjPvJRHBMydrYcpAtB4ohd		uuid:4c136bdd-f7fd-4412-ab6a-6fb2e102e507	48
2025-10-23 04:56:54	2025-10-23 04:58:16	22	Married	Tertiary	Trading		Rural	Yes	Community leader	Yes	Government subsidy	Yes	Antenatal care Skilled delivery Emergency obstetric care Others	1	1	1	0	1	Yes	5	Fully	Health center	Yes	Fully	Yes	Distance to facility Transport cost	0	1	1	0	0	0	0	More health workers	Very satisfied	Yes	Yes		588754997	041b5ef8-1ad2-4f9d-8789-3c9f8294f2d1	2025-10-23 03:58:18			submitted_via_web		vjPvJRHBMydrYcpAtB4ohd		uuid:041b5ef8-1ad2-4f9d-8789-3c9f8294f2d1	49
2025-10-23 04:58:16	2025-10-23 04:59:52	33	Married	Secondary	Trading	Christianity	Rural	Yes	Community leader	Yes	Government subsidy	Yes	Antenatal care Skilled delivery Emergency obstetric care Postnatal care	1	1	1	1	0	Yes	5	Fully	Health center	Yes	Fully	Yes	Distance to facility Transport cost	0	1	1	0	0	0	0	More health workers to support those already available	Very satisfied	Yes	Yes	Close hospital to be chosen for secondary health care services	588755432	5f9a31fd-d4b1-46d5-b0f5-504a72a45567	2025-10-23 03:59:54			submitted_via_web		vjPvJRHBMydrYcpAtB4ohd		uuid:5f9a31fd-d4b1-46d5-b0f5-504a72a45567	50
2025-10-23 04:59:52	2025-10-23 05:02:00	17	Married	Secondary	Student	Christianity	Rural	No		Yes		Yes	Antenatal care	1	0	0	0	0	Yes	4	Fully	Health center	Yes	Fully	Yes	Distance to facility Transport cost	0	1	1	0	0	0	0	Secondary health care to be made closer to the primary health care Incase if emergency	Very satisfied	Yes	Yes	IMSHIA to be continued if undegent people in the village	588756313	2fe3840b-63d0-43d6-a68d-19d391e45266	2025-10-23 04:02:02			submitted_via_web		vjPvJRHBMydrYcpAtB4ohd		uuid:2fe3840b-63d0-43d6-a68d-19d391e45266	51
2025-10-23 05:02:00	2025-10-23 05:03:17	20	Married	Secondary	Trading	Christianity	Rural	Yes	Friends/family	Yes	Employer	Yes	Antenatal care Skilled delivery Emergency obstetric care	1	1	1	0	0	Yes	5	Fully	Health center	Yes	Fully	Yes	Distance to facility Transport cost	0	1	1	0	0	0	0	More health workers needed	Very satisfied	Yes	Yes		588756801	476411d2-81cd-44d9-8815-650a93cb3e51	2025-10-23 04:03:19			submitted_via_web		vjPvJRHBMydrYcpAtB4ohd		uuid:476411d2-81cd-44d9-8815-650a93cb3e51	52
2025-10-23 05:03:17	2025-10-23 05:04:47	24	Married	Secondary	Secondary	Christianity	Rural	Yes	Community leader	Yes	Government subsidy	Yes	Antenatal care Skilled delivery Emergency obstetric care Postnatal care	1	1	1	1	0	Yes	3	Fully	Health center	Yes	Fully	Yes	Distance to facility	0	1	0	0	0	0	0	Intervention	Satisfied	Yes	Yes	I thank IMSHIA and our Governor for the IMSHIA programs	588757710	02d074e4-8abc-4a68-b8bc-ecfb5b3afbde	2025-10-23 04:04:49			submitted_via_web		vjPvJRHBMydrYcpAtB4ohd		uuid:02d074e4-8abc-4a68-b8bc-ecfb5b3afbde	53
2025-10-23 05:04:47	2025-10-23 05:06:16	25	Single	Secondary	Trading	Islam	Rural	Yes	Friends/family	Yes		Yes	Antenatal care Skilled delivery Emergency obstetric care Postnatal care	1	1	1	1	0	Yes		Fully	Health center	Yes	Fully	Yes	Transport cost	0	0	1	0	0	0	0		Very satisfied				588758336	ef4f0a49-9c95-4aaf-883a-2d7f65d222cc	2025-10-23 04:06:18			submitted_via_web		vjPvJRHBMydrYcpAtB4ohd		uuid:ef4f0a49-9c95-4aaf-883a-2d7f65d222cc	54
2025-10-23 05:06:16	2025-10-23 05:07:24	35		Secondary	House wife	Traditional	Rural	Yes	Friends/family	Yes		Yes	Antenatal care Skilled delivery Emergency obstetric care Postnatal care	1	1	1	1	0	Yes	9	Fully	Health center	Yes	Fully	Yes	Transport cost	0	0	1	0	0	0	0		Very satisfied	Yes	Yes		588758815	b2123781-303e-42e8-b346-61e9355903fd	2025-10-23 04:07:27			submitted_via_web		vjPvJRHBMydrYcpAtB4ohd		uuid:b2123781-303e-42e8-b346-61e9355903fd	55
2025-10-23 05:07:24	2025-10-23 05:08:47	35	Divorced/Separated	Tertiary	Civil servant	Islam	Rural	Yes				Yes	Antenatal care Skilled delivery Emergency obstetric care Postnatal care	1	1	1	1	0	Yes	9	Fully	Health center	Yes	Fully	Yes	Transport cost	0	0	1	0	0	0	0		Very satisfied	Yes	Yes		588759414	bd06fe8a-7381-4137-89b8-716cbdba2b8a	2025-10-23 04:08:49			submitted_via_web		vjPvJRHBMydrYcpAtB4ohd		uuid:bd06fe8a-7381-4137-89b8-716cbdba2b8a	56
2025-10-23 05:08:47	2025-10-23 05:09:56	36	Married	Secondary	Trading	Christianity	Rural	Yes	Health facility	Yes	Government subsidy	Yes	Antenatal care Skilled delivery Emergency obstetric care Postnatal care	1	1	1	1	0	Yes	4	Partially	Health center	Yes	Fully	Yes	Transport cost	0	0	1	0	0	0	0		Very satisfied	Yes			588759947	4f73374f-ad2b-4373-bf23-50853ca1f08a	2025-10-23 04:09:59			submitted_via_web		vjPvJRHBMydrYcpAtB4ohd		uuid:4f73374f-ad2b-4373-bf23-50853ca1f08a	57
2025-10-23 05:09:56	2025-10-23 05:11:08	27	Married	Secondary	Trading	Christianity	Rural	Yes	Health facility	Yes	Government subsidy	Yes	Antenatal care Skilled delivery Emergency obstetric care Postnatal care	1	1	1	1	0	Yes	3	Fully	Health center	Yes	Fully	Yes	Transport cost	0	0	1	0	0	0	0		Very satisfied	Yes	Yes		588760447	2f1d85b4-344e-41ea-9ed9-5f0386a8f82f	2025-10-23 04:11:10			submitted_via_web		vjPvJRHBMydrYcpAtB4ohd		uuid:2f1d85b4-344e-41ea-9ed9-5f0386a8f82f	58
2025-10-23 05:11:08	2025-10-23 05:12:11	32	Married	Secondary	Trading	Christianity	Rural	Yes	Health facility	Yes		Yes	Antenatal care Skilled delivery Emergency obstetric care Postnatal care	1	1	1	1	0	Yes	3	Fully	Health center	Yes	Fully	Yes										Very satisfied		Yes		588761313	82fe641b-6bc8-480d-b693-718c7188b006	2025-10-23 04:13:06			submitted_via_web		vjPvJRHBMydrYcpAtB4ohd		uuid:82fe641b-6bc8-480d-b693-718c7188b006	59
2025-10-23 05:12:11	2025-10-23 05:13:59	32	Married	Secondary	Trading	Islam	Rural	Yes	Health facility	Yes		Yes	Antenatal care Skilled delivery Emergency obstetric care Postnatal care	1	1	1	1	0	Yes	3	Fully	Health center	Yes	Fully	Yes										Very satisfied	Yes	Yes		588761748	9bd56650-78ee-48c4-ae2c-29e826ad3af5	2025-10-23 04:14:01			submitted_via_web		vjPvJRHBMydrYcpAtB4ohd		uuid:9bd56650-78ee-48c4-ae2c-29e826ad3af5	60
2025-10-23 05:13:59	2025-10-23 05:14:53	30	Married	Secondary	Trading	Christianity	Rural	Yes	Health facility	Yes	Government subsidy	Yes	Antenatal care Skilled delivery Emergency obstetric care Postnatal care	1	1	1	1	0	Yes	4		Health center	Yes	Fully	Yes	Transport cost	0	0	1	0	0	0	0		Very satisfied	Yes	Yes		588762066	e099b560-aa22-4782-a52f-68df313ab961	2025-10-23 04:14:54			submitted_via_web		vjPvJRHBMydrYcpAtB4ohd		uuid:e099b560-aa22-4782-a52f-68df313ab961	61
2025-10-23 05:14:53	2025-10-23 05:15:49	35	Divorced/Separated		Fashion designer	Christianity	Rural	Yes	Health facility	Yes		Yes	Antenatal care Skilled delivery Emergency obstetric care	1	1	1	0	0	Yes	4	Fully	Health center	Yes	Fully	Yes	Transport cost	0	0	1	0	0	0	0		Very satisfied	Yes	Yes		588762412	c8333164-c0a8-4c99-a50e-3fea06e9141e	2025-10-23 04:15:51			submitted_via_web		vjPvJRHBMydrYcpAtB4ohd		uuid:c8333164-c0a8-4c99-a50e-3fea06e9141e	62
2025-10-23 05:15:49	2025-10-23 05:17:11	41	Married	Secondary	Trading	Christianity	Rural	Yes	Health facility	Yes	Government subsidy	Yes	Antenatal care Skilled delivery Emergency obstetric care Others	1	1	1	0	1	Yes	3	Partially	Health center	Yes	Fully	Yes	Distance to facility Transport cost	0	1	1	0	0	0	0	More fund	Very satisfied	Yes	Yes	Keep it up	588762870	8cee6a4c-eb54-4781-bfcb-dc7ac81fefd8	2025-10-23 04:17:13			submitted_via_web		vjPvJRHBMydrYcpAtB4ohd		uuid:8cee6a4c-eb54-4781-bfcb-dc7ac81fefd8	63
2025-10-23 05:17:11	2025-10-23 05:18:27	33	Married	Tertiary	Farmer	Christianity	Rural	Yes	Health facility	Yes	Government subsidy	Yes	Antenatal care Skilled delivery Emergency obstetric care Postnatal care	1	1	1	1	0	Yes	6	Fully	Health center	Yes	Fully	Yes	Lack of awareness	1	0	0	0	0	0	0	More awareness	Very satisfied	Yes	Yes	More fund needed	588763343	56bcf5ec-a9fb-4fdd-9848-48ec93cf2027	2025-10-23 04:18:30			submitted_via_web		vjPvJRHBMydrYcpAtB4ohd		uuid:56bcf5ec-a9fb-4fdd-9848-48ec93cf2027	64
2025-10-23 05:18:27	2025-10-23 05:19:43	28	Divorced/Separated	Tertiary	Trader	Christianity	Rural	Yes	Radio/TV	Yes		Yes	Antenatal care Skilled delivery Emergency obstetric care Others	1	1	1	0	1	Yes	4	Fully	Health center	Yes	Fully	Yes	Distance to facility Negative attitude of health workers Cultural preference for home delivery	0	1	0	1	0	1	0	Create awareness					588763850	3d74aa15-7bbd-44f5-a288-c3f81cd06887	2025-10-23 04:19:46			submitted_via_web		vjPvJRHBMydrYcpAtB4ohd		uuid:3d74aa15-7bbd-44f5-a288-c3f81cd06887	65
2025-10-23 05:19:44	2025-10-23 05:20:59		Married	Tertiary	Self employed	Christianity		Yes		Yes	Self	Yes							Yes			Health center	Yes	Not at all		Transport cost	0	0	1	0	0	0	0		Very satisfied	Yes	Yes		588764408	528a7078-d6fa-4e27-b8ab-b53e555cb571	2025-10-23 04:21:01			submitted_via_web		vjPvJRHBMydrYcpAtB4ohd		uuid:528a7078-d6fa-4e27-b8ab-b53e555cb571	66
2025-10-23 05:20:59	2025-10-23 05:22:02							Yes	Radio/TV	Yes	Government subsidy	Yes	Skilled delivery	0	1	0	0	0	Yes	8	Fully	Health center	Yes	Fully	Yes	Transport cost	0	0	1	0	0	0	0	More awareness	Satisfied	Yes	Yes	More awareness	588765015	6eb4a9ac-dc6f-48de-ac6a-35ef7222ead8	2025-10-23 04:22:05			submitted_via_web		vjPvJRHBMydrYcpAtB4ohd		uuid:6eb4a9ac-dc6f-48de-ac6a-35ef7222ead8	67
2025-10-23 05:22:02	2025-10-23 05:23:39	31	Married	Tertiary	Civil servant	Christianity	Rural	Yes	Others			Yes	Antenatal care Skilled delivery Emergency obstetric care Postnatal care Others	1	1	1	1	1	Yes	18	Not at all	Home	Yes	Not at all	Yes	Transport cost Cultural preference for home delivery	0	0	1	0	0	1	0	More staff to be employed to aid services	Very satisfied	Yes	Yes	Please more awareness and separation of their center from L.G.A	588765846	eac174af-3885-479c-af69-1171419de73c	2025-10-23 04:23:42			submitted_via_web		vjPvJRHBMydrYcpAtB4ohd		uuid:eac174af-3885-479c-af69-1171419de73c	68
2025-10-23 05:23:39	2025-10-23 05:25:35	30	Married	Tertiary	Teaching	Christianity	Rural	Yes	Community leader	Yes	Government subsidy	Yes	Antenatal care Skilled delivery Emergency obstetric care Postnatal care	1	1	1	1	0	Yes	4	Fully	Health center	Yes	Fully	Yes	Lack of awareness	1	0	0	0	0	0	0	More awareness at the grassrout	Satisfied	Yes	Yes	The government should continued IMSHIA program because, it has really received the porrin the community	588766729	49b92db2-a0ea-4695-b2d4-ef234a720db4	2025-10-23 04:25:38			submitted_via_web		vjPvJRHBMydrYcpAtB4ohd		uuid:49b92db2-a0ea-4695-b2d4-ef234a720db4	69
2025-10-23 05:25:35	2025-10-23 05:28:58	28	Married	Primary	House wife	Christianity	Rural	Yes	Community leader	Yes		Yes	Antenatal care Skilled delivery Postnatal care Others	1	1	0	1	1	Yes	6	Fully	Health center	Yes	Fully	Yes	Transport cost Others	0	0	1	0	0	0	1	The issue if NIN will be a problem to them because all the issues this less privilege women don't have NIN	Satisfied	Yes	Yes	My suggestion is to plead IMSHIA to continue the program to help mor people and save lives of many people	588768258	313516ce-a19e-4114-b56d-d6f4688e0a59	2025-10-23 04:29:01			submitted_via_web		vjPvJRHBMydrYcpAtB4ohd		uuid:313516ce-a19e-4114-b56d-d6f4688e0a59	70
2025-10-23 05:28:58	2025-10-23 05:30:13	40	Married	Secondary	Teacher	Christianity	Rural	Yes	Friends/family	Yes	Government subsidy	Yes	Antenatal care Skilled delivery Postnatal care	1	1	0	1	0	Yes	6	Fully	Health center	Yes	Fully	Yes	Distance to facility Negative attitude of health workers	0	1	0	1	0	0	0	By supply of drugs	Very satisfied	Yes	Yes	IMSHIA Carry go	588768748	ab7f313a-a7b7-4c05-8478-024b9968ee42	2025-10-23 04:30:16			submitted_via_web		vjPvJRHBMydrYcpAtB4ohd		uuid:ab7f313a-a7b7-4c05-8478-024b9968ee42	71
2025-10-23 05:30:13	2025-10-23 05:31:20	29	Single	Secondary	House wife	Christianity	Rural	Yes	Radio/TV	Yes	Government subsidy	Yes	Skilled delivery Emergency obstetric care Postnatal care	0	1	1	1	0	Yes	8	Fully	Health center	Yes	Fully	Yes	Transport cost	0	0	1	0	0	0	0		Very satisfied	Yes	Yes	No	588769228	f8bca974-896e-4dbb-b1b1-d32f4303a247	2025-10-23 04:31:22			submitted_via_web		vjPvJRHBMydrYcpAtB4ohd		uuid:f8bca974-896e-4dbb-b1b1-d32f4303a247	72
2025-10-23 05:31:20	2025-10-23 05:33:45	27	Married	Secondary	House wife	Islam	Rural	Yes	Friends/family	Yes	Government subsidy	Yes	Skilled delivery Emergency obstetric care Postnatal care	0	1	1	1	0	Yes	8	Fully	Health center	Yes	Fully	Yes	Transport cost	0	0	1	0	0	0	0	IMSHIA is already ok	Very satisfied	Yes	Yes	No	588770107	488889ab-2a3b-433d-b516-557ea8f616e6	2025-10-23 04:33:48			submitted_via_web		vjPvJRHBMydrYcpAtB4ohd		uuid:488889ab-2a3b-433d-b516-557ea8f616e6	73
2025-10-23 05:33:46	2025-10-23 05:35:46	23	Married	Secondary	Business	Christianity	Rural	No				No							Yes	18		Home	Yes	Not at all	Yes	Others	0	0	0	0	0	0	1		Neutral	No		Please redo the registration so that those who did not hear can register	588770653	eb33a48d-b517-44ef-9966-3e3e23788325	2025-10-23 04:35:49			submitted_via_web		vjPvJRHBMydrYcpAtB4ohd		uuid:eb33a48d-b517-44ef-9966-3e3e23788325	74
2025-10-23 05:35:46	2025-10-23 05:37:04	32	Single	Tertiary	Teacher	Christianity	Rural	Yes	Health facility	Yes	Government subsidy	Yes	Antenatal care Skilled delivery Emergency obstetric care Postnatal care	1	1	1	1	0	Yes	8	Fully	Health center	Yes	Fully	Yes	Others	0	0	0	0	0	0	1	More facilities to be added	Satisfied	Yes	Yes		588771037	2e05b406-a51b-4996-9e46-20fa7b669888	2025-10-23 04:37:06			submitted_via_web		vjPvJRHBMydrYcpAtB4ohd		uuid:2e05b406-a51b-4996-9e46-20fa7b669888	75
2025-10-23 05:37:04	2025-10-23 05:38:23	36	Single	Tertiary	Tailor	Christianity	Urban	Yes	Radio/TV	Yes	Government subsidy	Yes	Antenatal care Skilled delivery Emergency obstetric care Postnatal care	1	1	1	1	0	Yes	8	Fully	Others	Yes	Fully	Yes	Distance to facility	0	1	0	0	0	0	0	More awareness and more facility to reduce distance	Very satisfied	Yes	Yes		588771446	84dcde07-2b94-46fd-9742-d1e4f8b81be0	2025-10-23 04:38:27			submitted_via_web		vjPvJRHBMydrYcpAtB4ohd		uuid:84dcde07-2b94-46fd-9742-d1e4f8b81be0	76
2025-10-23 05:38:23	2025-10-23 05:40:04	33	Married	Secondary	Trader	Christianity	Rural	Yes	Community leader	Yes	Government subsidy	Yes	Antenatal care Skilled delivery Emergency obstetric care Postnatal care	1	1	1	1	0	Yes	8	Fully	Health center	Yes	Fully	Yes	Negative attitude of health workers	0	0	0	1	0	0	0	More awareness and retraining of staff	Satisfied	Yes	Yes	Na	588772204	78240710-42c3-4fc3-87ad-90068182d417	2025-10-23 04:40:06			submitted_via_web		vjPvJRHBMydrYcpAtB4ohd		uuid:78240710-42c3-4fc3-87ad-90068182d417	77
2025-10-23 05:40:04	2025-10-23 05:41:22	28	Married	Secondary	Trader	Christianity	Rural	Yes	Community leader	Yes	Government subsidy	Yes	Antenatal care Skilled delivery Emergency obstetric care Postnatal care	1	1	1	1	0	Yes	6	Fully	Health center	Yes	Partially	Yes	Distance to facility	0	1	0	0	0	0	0	More awareness	Very satisfied	Yes	Yes	N/A	588772924	3fb8e32a-6853-4c85-b5ff-6e4d862ea9a6	2025-10-23 04:41:24			submitted_via_web		vjPvJRHBMydrYcpAtB4ohd		uuid:3fb8e32a-6853-4c85-b5ff-6e4d862ea9a6	78
2025-10-23 05:41:22	2025-10-23 05:42:27	30	Married	Secondary	Trader	Christianity	Rural	Yes	Health facility	Yes	Government subsidy	Yes	Antenatal care Skilled delivery Emergency obstetric care Postnatal care	1	1	1	1	0	Yes		Fully	Others	Yes	Fully	Yes	Distance to facility	0	1	0	0	0	0	0	More sensitization	Very satisfied	Yes	Yes	N/A	588773439	895dd0cc-2daa-4adf-b6e6-b708ccd9c3c3	2025-10-23 04:42:30			submitted_via_web		vjPvJRHBMydrYcpAtB4ohd		uuid:895dd0cc-2daa-4adf-b6e6-b708ccd9c3c3	79
2025-10-23 05:42:27	2025-10-23 05:43:23	29	Married	Secondary	Business	Christianity	Rural	Yes	Health facility	Yes		Yes	Antenatal care Skilled delivery Emergency obstetric care	1	1	1	0	0	Yes	3	Fully	Health center	Yes	Fully		Transport cost	0	0	1	0	0	0	0		Very satisfied	Yes	Yes		588773852	8b63acf2-0601-4349-be60-b7054cf21aba	2025-10-23 04:43:25			submitted_via_web		vjPvJRHBMydrYcpAtB4ohd		uuid:8b63acf2-0601-4349-be60-b7054cf21aba	80
2025-10-23 05:43:23	2025-10-23 05:44:24	24	Married	Tertiary	Student	Christianity	Rural	Yes	Radio/TV	Yes	Spouse/family	Yes	Antenatal care Skilled delivery Emergency obstetric care Postnatal care	1	1	1	1	0	Yes	6	Fully	Health center	Yes	Fully	Yes	Distance to facility Transport cost	0	1	1	0	0	0	0	More grassroot awareness	Very satisfied	Yes	Yes		588774506	ca631d09-140c-40a5-9dca-ba6429b7f0e6	2025-10-23 04:44:26			submitted_via_web		vjPvJRHBMydrYcpAtB4ohd		uuid:ca631d09-140c-40a5-9dca-ba6429b7f0e6	81
2025-10-23 05:44:24	2025-10-23 05:45:42	33	Married	Tertiary	Tailor	Christianity	Rural	Yes	Community leader	Yes	Government subsidy	Yes	Antenatal care Skilled delivery	1	1	0	0	0	Yes	6	Fully	Health center	Yes	Fully	Yes										Very satisfied	Yes	Yes		588775296	e6176460-b522-408e-9f68-3dc4d109f71a	2025-10-23 04:45:44			submitted_via_web		vjPvJRHBMydrYcpAtB4ohd		uuid:e6176460-b522-408e-9f68-3dc4d109f71a	82
2025-10-23 05:45:43	2025-10-23 05:46:42	23	Married	Secondary	House wife	Christianity	Rural	Yes	Health facility	Yes	Government subsidy	Yes	Antenatal care Emergency obstetric care	1	0	1	0	0	Yes	3	Partially	Health center	Yes	Fully	Yes										Very satisfied	Yes	Yes		588775839	e37b6c03-778c-40f3-87b2-a040e1ed10cd	2025-10-23 04:46:45			submitted_via_web		vjPvJRHBMydrYcpAtB4ohd		uuid:e37b6c03-778c-40f3-87b2-a040e1ed10cd	83
2025-10-23 05:46:43	2025-10-23 05:47:43	28	Married	Tertiary	Teaching	Christianity	Rural	Yes	Radio/TV	Yes	Government subsidy	Yes	Antenatal care Skilled delivery Emergency obstetric care Postnatal care	1	1	1	1	0	Yes	7	Fully	Others	Yes	Fully	Yes									To create more information	Very satisfied	Yes	Yes		588776444	014402b5-e72f-46a8-a6e9-1359b180eab2	2025-10-23 04:47:45			submitted_via_web		vjPvJRHBMydrYcpAtB4ohd		uuid:014402b5-e72f-46a8-a6e9-1359b180eab2	84
2025-10-23 05:47:43	2025-10-23 05:48:40	35	Married	Secondary	Farming	Christianity	Rural	Yes	Health facility	Yes	Government subsidy	Yes	Antenatal care Skilled delivery Emergency obstetric care Postnatal care	1	1	1	1	0	Yes	3	Fully	Health center	Yes	Fully	Yes										Very satisfied	Yes	Yes		588777041	b4bc36fe-1d18-43a0-b7ed-068666b540ea	2025-10-23 04:48:42			submitted_via_web		vjPvJRHBMydrYcpAtB4ohd		uuid:b4bc36fe-1d18-43a0-b7ed-068666b540ea	85
2025-10-23 05:48:40	2025-10-23 05:49:26	28	Married	Secondary	Farming	Islam	Rural	Yes	Radio/TV	Yes	Government subsidy	Yes	Postnatal care	0	0	0	1	0	Yes		Fully	Health center	Yes	Fully	Yes	Distance to facility Transport cost	0	1	1	0	0	0	0		Very satisfied	Yes	Yes	More hands	588777522	9e2dce3f-220c-45ad-9771-1a9606f3da0b	2025-10-23 04:49:28			submitted_via_web		vjPvJRHBMydrYcpAtB4ohd		uuid:9e2dce3f-220c-45ad-9771-1a9606f3da0b	86
2025-10-23 05:49:26	2025-10-23 05:50:31	31	Married	Tertiary	Teaching	Islam	Urban	Yes	Health facility	Yes	Government subsidy	Yes	Skilled delivery Emergency obstetric care	0	1	1	0	0	Yes	2	Fully	General hospital	Yes	Fully	Yes	Distance to facility Transport cost	0	1	1	0	0	0	0	We need more hands	Satisfied	Yes	Yes	They have tried	588778079	bf9056a2-5a16-419e-a528-05ec2e61f002	2025-10-23 04:50:34			submitted_via_web		vjPvJRHBMydrYcpAtB4ohd		uuid:bf9056a2-5a16-419e-a528-05ec2e61f002	87
2025-10-23 05:50:32	2025-10-23 05:51:45	30	Married	Secondary	Trading	Christianity	Rural	Yes	Health facility	Yes	Government subsidy	Yes	Antenatal care Skilled delivery Emergency obstetric care Postnatal care	1	1	1	1	0	Yes	1	Partially	Health center	Yes	Fully	Yes										Very satisfied	Yes	Yes		588778754	b7bf98a4-5618-4ac4-b563-c0622a8a9cb2	2025-10-23 04:51:48			submitted_via_web		vjPvJRHBMydrYcpAtB4ohd		uuid:b7bf98a4-5618-4ac4-b563-c0622a8a9cb2	88
2025-10-23 05:51:45	2025-10-23 05:53:00	24	Married	Secondary	Trading	Christianity	Rural	Yes	Health facility	Yes	Government subsidy	Yes	Antenatal care Skilled delivery Emergency obstetric care Postnatal care	1	1	1	1	0	Yes	3	Fully	Health center	Yes	Fully	Yes	Distance to facility Transport cost Cultural preference for home delivery	0	1	1	0	0	1	0	More staff should be employ	Very satisfied	Yes	Yes	More grease to their elbow	588779396	4d72a86e-4e0b-4d73-b998-ec22e8247257	2025-10-23 04:53:02			submitted_via_web		vjPvJRHBMydrYcpAtB4ohd		uuid:4d72a86e-4e0b-4d73-b998-ec22e8247257	89
2025-10-23 05:53:00	2025-10-23 05:53:56	33	Married	Secondary		Christianity	Urban	Yes	Health facility	Yes									Yes	4	Fully	Health center	Yes	Fully	Yes										Very satisfied	Yes	Yes	More hands	588779822	14ae7091-3d88-4c37-b466-70457301a0bf	2025-10-23 04:53:58			submitted_via_web		vjPvJRHBMydrYcpAtB4ohd		uuid:14ae7091-3d88-4c37-b466-70457301a0bf	90
2025-10-23 05:53:56	2025-10-23 05:54:38	29	Married	Secondary	Business	Christianity	Rural	Yes	Health facility	Yes	Government subsidy	Yes	Antenatal care Skilled delivery Emergency obstetric care Postnatal care	1	1	1	1	0	Yes	2	Partially	Health center	Yes	Fully	Yes										Very satisfied	Yes	Yes		588780094	9e110da2-f9c6-49c4-8608-a89f50e39641	2025-10-23 04:54:40			submitted_via_web		vjPvJRHBMydrYcpAtB4ohd		uuid:9e110da2-f9c6-49c4-8608-a89f50e39641	91
2025-10-23 05:54:38	2025-10-23 05:56:23	29	Married	Secondary	Farming	Christianity	Rural	Yes	Community leader	Yes	Government subsidy	Yes	Antenatal care Skilled delivery Emergency obstetric care Postnatal care	1	1	1	1	0	Yes	4	Fully	Health center	Yes	Fully	Yes	Lack of awareness Distance to facility	1	1	0	0	0	0	0	Provision of ambulance for the emergency is needed urgently	Satisfied	Yes	Yes	Very happy to be one of the beneficiaries, God bless you amen	588780890	181b27a7-5d11-4bf7-a5ed-414e06f65280	2025-10-23 04:56:25			submitted_via_web		vjPvJRHBMydrYcpAtB4ohd		uuid:181b27a7-5d11-4bf7-a5ed-414e06f65280	92
2025-10-23 05:56:23	2025-10-23 05:57:14	35	Married	Secondary	Business	Christianity	Rural	Yes	Health facility	Yes	Government subsidy	Yes	Antenatal care Skilled delivery Emergency obstetric care Postnatal care	1	1	1	1	0	Yes	1	Fully	Home	Yes	Fully	Yes										Very satisfied	Yes	Yes		588781216	ca96cd4e-4b5b-4a4f-a89c-ca968adca49e	2025-10-23 04:57:16			submitted_via_web		vjPvJRHBMydrYcpAtB4ohd		uuid:ca96cd4e-4b5b-4a4f-a89c-ca968adca49e	93
2025-10-23 05:57:14	2025-10-23 05:58:38	31	Married	Secondary	Business	Christianity	Rural	Yes	Community leader	Yes	Government subsidy	Yes	Antenatal care Skilled delivery Emergency obstetric care Postnatal care	1	1	1	1	0	Yes	4	Fully	Health center	Yes	Fully	Yes	Transport cost	0	0	1	0	0	0	0	More money is needed	Satisfied	Yes	Yes		588781797	8934d346-e927-4f53-809e-67f9a90ae2be	2025-10-23 04:58:40			submitted_via_web		vjPvJRHBMydrYcpAtB4ohd		uuid:8934d346-e927-4f53-809e-67f9a90ae2be	94
2025-10-23 05:58:38	2025-10-23 05:59:35	32	Married	Tertiary	Teacher	Christianity	Rural	Yes	Health facility	Yes	Government subsidy	Yes	Antenatal care Skilled delivery Emergency obstetric care Postnatal care	1	1	1	1	0	Yes	7	Fully	Health center	Yes	Fully	Yes	Others	0	0	0	0	0	0	1		Satisfied	Yes	Yes	God bless	588782141	59e402c5-1527-495f-bffe-80f8149499c1	2025-10-23 04:59:37			submitted_via_web		vjPvJRHBMydrYcpAtB4ohd		uuid:59e402c5-1527-495f-bffe-80f8149499c1	95
2025-10-23 05:59:35	2025-10-23 07:11:57	29	Married	Secondary	Teaching	Christianity	Rural	Yes	Health facility	Yes	Employer	Yes	Antenatal care Skilled delivery Postnatal care	1	1	0	1	0	Yes	6	Fully	Health center	Yes	Fully	Yes	Others	0	0	0	0	0	0	1	Provision of food	Satisfied	Yes	Yes	God bless	588819152	29c003bb-0aec-4bc7-a180-1bfc9d3a9e70	2025-10-23 06:12:00			submitted_via_web		vjPvJRHBMydrYcpAtB4ohd		uuid:29c003bb-0aec-4bc7-a180-1bfc9d3a9e70	96
2025-10-23 07:11:58	2025-10-23 07:13:02	34	Married	Secondary	Trading	Christianity	Rural	Yes	Health facility	Yes	Government subsidy	Yes	Antenatal care Skilled delivery Postnatal care	1	1	0	1	0	Yes	5	Fully	Health center	Yes	Fully	Yes	Others	0	0	0	0	0	0	1	Food	Satisfied	Yes	Yes	God bless you all	588819716	f386327b-b8f0-4fb9-98ee-e412000796be	2025-10-23 06:13:05			submitted_via_web		vjPvJRHBMydrYcpAtB4ohd		uuid:f386327b-b8f0-4fb9-98ee-e412000796be	97
2025-10-23 07:13:02	2025-10-23 07:14:12	33	Married	Secondary	Trading	Christianity	Rural	Yes	Health facility	Yes	Employer	Yes	Antenatal care Emergency obstetric care Postnatal care	1	0	1	1	0	Yes	7	Fully	Health center	Yes	Fully	No	Others	0	0	0	0	0	0	1	Provision of more funds	Satisfied	Yes	Yes	Thank you all	588820343	0eee8bdd-4ae0-4dbf-9bee-d039d6e62419	2025-10-23 06:14:14			submitted_via_web		vjPvJRHBMydrYcpAtB4ohd		uuid:0eee8bdd-4ae0-4dbf-9bee-d039d6e62419	98
2025-10-23 07:14:12	2025-10-23 07:15:01	19	Divorced/Separated	Secondary	Business	Christianity	Urban	Yes	Health facility	Yes	Government subsidy	Yes	Antenatal care Skilled delivery	1	1	0	0	0	Yes	5	Fully	Health center	Yes		Yes	Transport cost	0	0	1	0	0	0	0		Very satisfied	Yes	Yes		588820816	ab69129e-8d30-44ca-a8ce-b76aae411a0b	2025-10-23 06:15:03			submitted_via_web		vjPvJRHBMydrYcpAtB4ohd		uuid:ab69129e-8d30-44ca-a8ce-b76aae411a0b	99
2025-10-23 07:15:01	2025-10-23 07:15:47	40	Married	Tertiary	Business	Christianity	Urban	Yes	Health facility	Yes	Employer	Yes	Antenatal care Skilled delivery Emergency obstetric care Postnatal care	1	1	1	1	0	Yes	2	Fully	Health center	Yes	Fully	Yes	Transport cost	0	0	1	0	0	0	0		Very satisfied	Yes	Yes		588821266	be918415-5557-4f7c-b8d7-89d4a283d145	2025-10-23 06:15:50			submitted_via_web		vjPvJRHBMydrYcpAtB4ohd		uuid:be918415-5557-4f7c-b8d7-89d4a283d145	100
2025-10-23 07:15:47	2025-10-23 07:17:11	39	Married	Tertiary	Hair stylist	Christianity	Rural	Yes	Health facility	Yes	Government subsidy	Yes	Antenatal care Skilled delivery Postnatal care	1	1	0	1	0	Yes	8	Fully	Health center	Yes	Fully	Yes	Others	0	0	0	0	0	0	1	Provision of fund	Neutral	Yes	Yes	We are grateful thank you all	588821968	db91180e-53c4-4b56-a37c-bfb357dd00d2	2025-10-23 06:17:14			submitted_via_web		vjPvJRHBMydrYcpAtB4ohd		uuid:db91180e-53c4-4b56-a37c-bfb357dd00d2	101
2025-10-23 07:17:12	2025-10-23 07:18:01	29	Married	Secondary	Trader	Christianity	Urban	Yes	Health facility	Yes	Government subsidy	Yes	Antenatal care Skilled delivery Emergency obstetric care Postnatal care	1	1	1	1	0	Yes	4	Fully	Health center	Yes			Transport cost	0	0	1	0	0	0	0		Very satisfied	Yes	Yes		588822395	4623cc62-6f30-47cd-af15-0417c76d40f2	2025-10-23 06:18:03			submitted_via_web		vjPvJRHBMydrYcpAtB4ohd		uuid:4623cc62-6f30-47cd-af15-0417c76d40f2	102
2025-10-23 07:18:01	2025-10-23 07:18:54	36	Married	Secondary	Trader	Christianity	Rural	Yes	Friends/family	Yes	Government subsidy	Yes	Antenatal care Skilled delivery Emergency obstetric care Postnatal care	1	1	1	1	0	Yes	8	Fully	Health center	Yes	Fully	No	Distance to facility Transport cost	0	1	1	0	0	0	0		Satisfied	Yes	Yes	Continue awareness	588823014	e237f366-e99b-47ef-b00c-a62d42982aca	2025-10-23 06:18:57			submitted_via_web		vjPvJRHBMydrYcpAtB4ohd		uuid:e237f366-e99b-47ef-b00c-a62d42982aca	103
2025-10-23 07:18:54	2025-10-23 07:19:57	28		Secondary	Business	Christianity	Rural	Yes	Health facility	Yes	Government subsidy	Yes	Antenatal care Skilled delivery Postnatal care	1	1	0	1	0	Yes	5	Fully	Health center	Yes	Fully	Yes	Others	0	0	0	0	0	0	1	Provision of fund			Yes	They are trying but more effort	588823816	fd68d954-e53e-4cbf-bacc-896d5dd02b40	2025-10-23 06:20:00			submitted_via_web		vjPvJRHBMydrYcpAtB4ohd		uuid:fd68d954-e53e-4cbf-bacc-896d5dd02b40	104
2025-10-23 07:19:57	2025-10-23 07:21:16	32	Married	Primary		Christianity	Rural	Yes	Health facility	Yes	Government subsidy	Yes	Antenatal care Skilled delivery Emergency obstetric care	1	1	1	0	0	Yes	6	Fully	Health center	Yes	Fully	Yes									Please make una no stop the free treatment	Very satisfied	Yes	Yes		588824796	61c8a8a7-d848-4901-acf4-7d8b553b25a2	2025-10-23 06:21:18			submitted_via_web		vjPvJRHBMydrYcpAtB4ohd		uuid:61c8a8a7-d848-4901-acf4-7d8b553b25a2	105
2025-10-23 07:21:16	2025-10-23 07:22:13	31	Married	Secondary	Treader	Christianity	Rural	Yes	Health facility	Yes	Government subsidy	Yes	Antenatal care Skilled delivery	1	1	0	0	0	Yes	2	Fully	Health center	Yes	Fully	Yes										Very satisfied	Yes	Yes		588825406	f7599190-68be-4366-86df-e316b4b555d4	2025-10-23 06:22:15			submitted_via_web		vjPvJRHBMydrYcpAtB4ohd		uuid:f7599190-68be-4366-86df-e316b4b555d4	106
2025-10-23 07:22:13	2025-10-23 07:23:37	30	Married		Teaching	Christianity	Urban	Yes	Radio/TV	Yes	Government subsidy	Yes	Antenatal care Skilled delivery Emergency obstetric care	1	1	1	0	0	Yes	3	Fully	Others	Yes	Fully	Yes										Very satisfied	Yes	Yes	Hope MISHA has come to stay	588826507	eb325c26-aea7-4e54-85fa-a6608dd3ab19	2025-10-23 06:23:40			submitted_via_web		vjPvJRHBMydrYcpAtB4ohd		uuid:eb325c26-aea7-4e54-85fa-a6608dd3ab19	107
2025-10-23 07:23:38	2025-10-23 07:24:31	26	Married	Secondary	Self employed	Christianity	Rural	Yes	Community leader	Yes	Government subsidy	Yes	Antenatal care Skilled delivery	1	1	0	0	0	Yes	7	Fully	Health center	Yes	Fully	Yes									Continue awareness	Very satisfied	Yes	Yes	No	588827205	933ac128-ddb7-4b78-bcf7-1b3ab0c39aa4	2025-10-23 06:24:34			submitted_via_web		vjPvJRHBMydrYcpAtB4ohd		uuid:933ac128-ddb7-4b78-bcf7-1b3ab0c39aa4	108
2025-10-23 07:24:31	2025-10-23 07:25:26	21	Married	Secondary	House wife	Christianity	Rural	Yes	Health facility	Yes	Government subsidy	Yes	Antenatal care Skilled delivery	1	1	0	0	0	Yes	4	Fully	Health center	Yes	Fully	Yes									Continue awareness	Very satisfied	Yes	Yes	No	588827819	04844f7a-a004-4c45-b2c9-eced9542464d	2025-10-23 06:25:28			submitted_via_web		vjPvJRHBMydrYcpAtB4ohd		uuid:04844f7a-a004-4c45-b2c9-eced9542464d	109
2025-10-23 07:25:26	2025-10-23 07:26:16	25	Married	Secondary	Business	Christianity	Rural	Yes	Community leader	Yes	Government subsidy	Yes	Antenatal care Skilled delivery	1	1	0	0	0	Yes	6	Fully	Health center	Yes	Fully	Yes										Very satisfied	Yes	Yes	No	588828291	85e9aacb-bee4-417a-9739-cfe7aeda5211	2025-10-23 06:26:19			submitted_via_web		vjPvJRHBMydrYcpAtB4ohd		uuid:85e9aacb-bee4-417a-9739-cfe7aeda5211	110
2025-10-23 07:26:16	2025-10-23 07:27:17	20	Married	Secondary	Trading	Christianity	Rural	Yes	Health facility	Yes	Government subsidy	Yes	Antenatal care Skilled delivery	1	1	0	0	0	Yes	4	Fully	Health center	Yes	Fully	Yes										Very satisfied	Yes	Yes	No	588828882	4eaa06e5-539e-4476-80c3-7a7df4a4a301	2025-10-23 06:27:20			submitted_via_web		vjPvJRHBMydrYcpAtB4ohd		uuid:4eaa06e5-539e-4476-80c3-7a7df4a4a301	111
2025-10-23 07:27:17	2025-10-23 07:28:15	39	Single	Secondary	Business	Christianity	Rural	Yes	Community leader	Yes	Government subsidy	Yes	Antenatal care Skilled delivery Emergency obstetric care	1	1	1	0	0	Yes	5	Fully	Health center	Yes	Fully	Yes									To keep up with the program	Very satisfied	Yes	Yes	No	588829499	a7b14995-5b4c-45a3-a8cb-eb24994ecd37	2025-10-23 06:28:18			submitted_via_web		vjPvJRHBMydrYcpAtB4ohd		uuid:a7b14995-5b4c-45a3-a8cb-eb24994ecd37	112
2025-10-23 07:28:15	2025-10-23 07:29:28	35	Married	Secondary	Business	Christianity	Rural	Yes	Health facility	Yes	Government subsidy	Yes	Antenatal care Emergency obstetric care Postnatal care	1	0	1	1	0	Yes	3	Fully	Others	Yes	Fully	Yes									Not to end the program	Very satisfied	Yes	Yes	No	588830309	5a8545cf-6b9c-4bb4-94b8-efbf7ab8dfbc	2025-10-23 06:29:30			submitted_via_web		vjPvJRHBMydrYcpAtB4ohd		uuid:5a8545cf-6b9c-4bb4-94b8-efbf7ab8dfbc	113
2025-10-23 07:29:28	2025-10-23 07:30:15	23	Married	Secondary	House wife	Christianity	Rural	Yes	Community leader	Yes	Government subsidy	Yes	Antenatal care Skilled delivery	1	1	0	0	0	Yes	4	Fully	Health center	Yes	Fully	Yes											Yes	Yes	Not	588830905	2d555ab3-3ab4-4a2a-8bc7-3137c0e886f4	2025-10-23 06:30:18			submitted_via_web		vjPvJRHBMydrYcpAtB4ohd		uuid:2d555ab3-3ab4-4a2a-8bc7-3137c0e886f4	114
2025-10-23 07:30:16	2025-10-23 07:31:12	23	Married	Tertiary	Teacher	Christianity	Rural	Yes	Community leader	Yes	Government subsidy	Yes	Antenatal care Postnatal care	1	0	0	1	0	Yes	16	Fully	Health center	Yes	Fully	Yes	Lack of awareness Distance to facility Transport cost	1	1	1	0	0	0	0			Yes	Yes	No	588831477	1c2dc972-2e84-44ee-9c3a-6920235c4961	2025-10-23 06:31:15			submitted_via_web		vjPvJRHBMydrYcpAtB4ohd		uuid:1c2dc972-2e84-44ee-9c3a-6920235c4961	115
2025-10-23 07:31:12	2025-10-23 07:32:02	23	Married	Secondary	House wife	Christianity	Rural	Yes	Health facility	Yes	Government subsidy	Yes	Antenatal care Postnatal care	1	0	0	1	0	Yes	13	Fully	Health center	Yes	Fully	Yes										Neutral	Yes	Yes	No	588831983	1e292411-6809-4f84-9065-f823c5f2006e	2025-10-23 06:32:05			submitted_via_web		vjPvJRHBMydrYcpAtB4ohd		uuid:1e292411-6809-4f84-9065-f823c5f2006e	116
2025-10-23 07:32:03	2025-10-23 07:32:49	30	Married	Tertiary	Teacher	Christianity	Rural	Yes	Community leader	Yes	Government subsidy	Yes	Antenatal care Skilled delivery	1	1	0	0	0	Yes	17	Fully	Health center	Yes	Fully															588832422	e6a6e44c-e683-4c7a-91ec-67e593a80125	2025-10-23 06:32:51			submitted_via_web		vjPvJRHBMydrYcpAtB4ohd		uuid:e6a6e44c-e683-4c7a-91ec-67e593a80125	117
2025-10-23 07:32:49	2025-10-23 07:33:46	27	Divorced/Separated		House wife	Christianity	Rural	Yes	Health facility	Yes		Yes	Antenatal care Skilled delivery	1	1	0	0	0	Yes	16		Health center	Yes	Fully	Yes	Distance to facility Transport cost	0	1	1	0	0	0	0		Satisfied	Yes	Yes		588833041	2bb9f3e6-77d4-4deb-a572-d800ee751ee4	2025-10-23 06:33:48			submitted_via_web		vjPvJRHBMydrYcpAtB4ohd		uuid:2bb9f3e6-77d4-4deb-a572-d800ee751ee4	118
2025-10-23 07:33:46	2025-10-23 07:34:46	21	Married	Secondary	Farmer	Christianity	Rural	Yes	Health facility	Yes		Yes	Antenatal care	1	0	0	0	0	Yes	19	Fully	Health center	Yes	Fully	Yes	Lack of awareness Distance to facility Transport cost	1	1	1	0	0	0	0		Satisfied	Yes	Yes	No	588833698	e9d7340d-1e7a-4b85-86d2-d6adf4b43739	2025-10-23 06:34:48			submitted_via_web		vjPvJRHBMydrYcpAtB4ohd		uuid:e9d7340d-1e7a-4b85-86d2-d6adf4b43739	119
2025-10-23 07:34:46	2025-10-23 07:35:54	39	Divorced/Separated	Secondary	Business woman	Christianity		Yes	Health facility	Yes		Yes	Antenatal care	1	0	0	0	0	Yes	18	Fully	Health center	Yes	Fully	Yes	Lack of awareness Distance to facility	1	1	0	0	0	0	0			Yes	Yes	Bo	588834310	d69dabc9-876f-4838-86a6-2b3af86f7893	2025-10-23 06:35:57			submitted_via_web		vjPvJRHBMydrYcpAtB4ohd		uuid:d69dabc9-876f-4838-86a6-2b3af86f7893	120
2025-10-23 07:35:55	2025-10-23 07:36:54	37	Married	Secondary	Business woman	Christianity	Rural	Yes	Health facility	Yes	Government subsidy	Yes	Antenatal care	1	0	0	0	0	Yes	17	Fully	Health center	Yes	Fully	Yes	Lack of awareness Distance to facility	1	1	0	0	0	0	0		Satisfied	Yes	Yes	No	588834862	cd3b2580-bba1-4e70-891a-46344c8d6be0	2025-10-23 06:36:56			submitted_via_web		vjPvJRHBMydrYcpAtB4ohd		uuid:cd3b2580-bba1-4e70-891a-46344c8d6be0	121
2025-10-23 07:36:54	2025-10-23 07:37:55	25	Married	Secondary		Christianity	Rural	Yes	Health facility	Yes	Government subsidy	Yes	Antenatal care	1	0	0	0	0	Yes	12	Fully	Health center	Yes	Fully	Yes	Distance to facility Negative attitude of health workers	0	1	0	1	0	0	0		Satisfied	Yes	Yes	No	588835372	fe43607f-6d30-4041-b9bd-62f75f33f3d7	2025-10-23 06:37:57			submitted_via_web		vjPvJRHBMydrYcpAtB4ohd		uuid:fe43607f-6d30-4041-b9bd-62f75f33f3d7	122
2025-10-23 07:37:55	2025-10-23 07:39:12	24	Married	Secondary	Farmer	Christianity	Rural	Yes	Health facility	Yes	Government subsidy	Yes	Antenatal care	1	0	0	0	0	Yes	14	Fully	Health center	Yes	Fully	Yes	Lack of awareness Distance to facility	1	1	0	0	0	0	0			Yes	Yes	No	588835944	1090a833-7eea-468c-bef5-c4941c57367b	2025-10-23 06:39:14			submitted_via_web		vjPvJRHBMydrYcpAtB4ohd		uuid:1090a833-7eea-468c-bef5-c4941c57367b	123
2025-10-23 07:39:12	2025-10-23 07:40:55	43		Secondary	Farmer	Christianity	Rural	Yes	Health facility	Yes	Government subsidy	Yes	Antenatal care	1	0	0	0	0	Yes	17	Fully	Health center	Yes	Fully	Yes	Lack of awareness Distance to facility	1	1	0	0	0	0	0		Satisfied	Yes	Yes	No	588837043	55eaea2d-4475-4d0c-81ca-60c2c437e375	2025-10-23 06:40:57			submitted_via_web		vjPvJRHBMydrYcpAtB4ohd		uuid:55eaea2d-4475-4d0c-81ca-60c2c437e375	124
2025-10-23 07:40:55	2025-10-23 07:42:19	30	Married	Secondary	Trader	Christianity	Rural	Yes	Health facility	Yes	Government subsidy	Yes	Skilled delivery Emergency obstetric care Postnatal care	0	1	1	1	0	Yes	7	Fully	Health center	Yes	Fully	Yes	Others	0	0	0	0	0	0	1	Every facility should offer the service	Very satisfied	Yes	Yes	No	588838043	90f70f78-3d03-4283-b4fe-b5c0baeed420	2025-10-23 06:42:21			submitted_via_web		vjPvJRHBMydrYcpAtB4ohd		uuid:90f70f78-3d03-4283-b4fe-b5c0baeed420	125
2025-10-23 07:42:19	2025-10-23 07:43:56	29	Married	Secondary	Teacher	Christianity	Rural	Yes	Friends/family	Yes	Government subsidy	Yes	Antenatal care Skilled delivery Postnatal care	1	1	0	1	0	Yes	4	Fully	Health center	Yes	Fully	Yes	Others	0	0	0	0	0	0	1	To provide for all services	Very satisfied	Yes	Yes	Agreed because they are doing well	588839183	47c36d79-19e5-417a-88a7-69d626d79266	2025-10-23 06:43:58			submitted_via_web		vjPvJRHBMydrYcpAtB4ohd		uuid:47c36d79-19e5-417a-88a7-69d626d79266	126
2025-10-23 07:43:56	2025-10-23 07:44:50	40	Single	Tertiary	Artisan	Islam	Rural	Yes	Community leader	No									No															Awareness	Satisfied	Yes	Yes	Quality assurance	588839870	da123214-664b-4eaa-86a4-19208ac601fb	2025-10-23 06:44:52			submitted_via_web		vjPvJRHBMydrYcpAtB4ohd		uuid:da123214-664b-4eaa-86a4-19208ac601fb	127
2025-10-23 07:44:50	2025-10-23 07:46:01	30	Married		Public health worker	Christianity	Rural	Yes	Friends/family	Yes	Government subsidy	Yes	Antenatal care Skilled delivery Emergency obstetric care Others	1	1	1	0	1	Yes		Fully														Satisfied	Yes	Yes		588840667	9683fcc2-5a82-4bb4-bd16-bd7b7e6b58dc	2025-10-23 06:46:03			submitted_via_web		vjPvJRHBMydrYcpAtB4ohd		uuid:9683fcc2-5a82-4bb4-bd16-bd7b7e6b58dc	128
2025-10-23 07:46:01	2025-10-23 07:46:45	41	Married	Tertiary	Health care provider	Christianity	Rural	Yes	Health facility	Yes		Yes														Transport cost	0	0	1	0	0	0	0		Very satisfied	Yes	Yes		588841206	5bed1a4f-9b7a-4c11-9b89-63ca4a861d3f	2025-10-23 06:46:47			submitted_via_web		vjPvJRHBMydrYcpAtB4ohd		uuid:5bed1a4f-9b7a-4c11-9b89-63ca4a861d3f	129
2025-10-23 07:46:45	2025-10-23 07:48:42	31	Married	Tertiary	Health volunteer officer	Islam	Rural	Yes	Friends/family	No		Yes	Skilled delivery	0	1	0	0	0	Yes		Not at all		Yes	Fully	Yes	Transport cost	0	0	1	0	0	0	0	Paper check up	Neutral	Yes	Yes		588842581	0628def5-3e34-4383-987b-56e37a9d71e3	2025-10-23 06:48:47			submitted_via_web		vjPvJRHBMydrYcpAtB4ohd		uuid:0628def5-3e34-4383-987b-56e37a9d71e3	130
2025-10-23 07:48:42	2025-10-23 07:50:51	30	Single		Business/student	Christianity	Rural	Yes	Friends/family	Yes	Government subsidy	Yes	Antenatal care Others	1	0	0	0	1	Yes	4	Fully	Health center	Yes	Fully	Yes	Distance to facility	0	1	0	0	0	0	0	Providing accurate facility	Satisfied	Yes	Yes	IMSHIA is good and I suggest the should provide more facility to health care center	588844249	76940e90-c711-43b1-b144-54a71d823242	2025-10-23 06:50:54			submitted_via_web		vjPvJRHBMydrYcpAtB4ohd		uuid:76940e90-c711-43b1-b144-54a71d823242	131
2025-10-23 07:50:51	2025-10-23 07:54:48	30	Married	Tertiary	Student/business woman	Christianity	Rural	Yes	Friends/family	No									Yes		Fully	Health center	Yes	Fully	Yes	Transport cost	0	0	1	0	0	0	0	Women's use of IMSHIA services can be improved through greater awareness, easier access and more supportive environment	Satisfied	Yes	Yes	Improving awareness access and trust key to increase women's uptake of IMSHIA services	588846978	8ecac1db-f784-4c2a-82d6-7bf3f1533fd4	2025-10-23 06:54:50			submitted_via_web		vjPvJRHBMydrYcpAtB4ohd		uuid:8ecac1db-f784-4c2a-82d6-7bf3f1533fd4	132
2025-10-23 07:54:48	2025-10-23 07:56:52	29	Married	Tertiary	Student/trader	Christianity	Rural	Yes	Health facility	No		No							Yes	3	Partially	Teaching hospital	Yes	Partially	Yes	Lack of awareness	1	0	0	0	0	0	0	Create adequate awareness program	Satisfied	Yes	Yes	IMSHIA improve maternal health care and I suggest a creative awareness IMSHIA program should be made to improve care	588848168	9c20abe2-92c9-4c92-8f6e-10cd6a83e278	2025-10-23 06:56:55			submitted_via_web		vjPvJRHBMydrYcpAtB4ohd		uuid:9c20abe2-92c9-4c92-8f6e-10cd6a83e278	133
2025-10-23 07:56:53	2025-10-23 07:58:07	28	Married	Secondary	House wife	Islam	Rural	Yes	Health facility	Yes	Government subsidy	Yes	Antenatal care Skilled delivery Emergency obstetric care	1	1	1	0	0	Yes	5	Fully	Health center	Yes	Fully	Yes	Others	0	0	0	0	0	0	1	To make sure they provide all services	Very satisfied	Yes	Yes	Agreed because they are doing well	588848900	f939cd51-fef8-4496-99a7-45a9ac64a989	2025-10-23 06:58:09			submitted_via_web		vjPvJRHBMydrYcpAtB4ohd		uuid:f939cd51-fef8-4496-99a7-45a9ac64a989	134
2025-10-23 07:58:07	2025-10-23 07:59:35	26	Married	Tertiary	Farmer	Christianity	Urban	Yes	Health facility	Yes	Government subsidy	Yes	Antenatal care Skilled delivery Emergency obstetric care Postnatal care	1	1	1	1	0	Yes	4	Fully	Health center	Yes	Fully	Yes	Distance to facility Transport cost Cultural preference for home delivery	0	1	1	0	0	1	0	Creating awareness through magazine, newspaper, radio and television stations	Very satisfied	Yes	Yes		588849886	5920d521-c437-495e-a70a-0597d0107dd3	2025-10-23 06:59:38			submitted_via_web		vjPvJRHBMydrYcpAtB4ohd		uuid:5920d521-c437-495e-a70a-0597d0107dd3	135
2025-10-23 07:59:35	2025-10-23 08:00:40	26	Married	Secondary	Trader	Christianity	Urban	Yes	Health facility	Yes	Government subsidy	Yes	Antenatal care Skilled delivery Emergency obstetric care Postnatal care	1	1	1	1	0	Yes	5	Not at all	Health center	Yes	Not at all	Yes									Create more awareness through community mobilization	Satisfied	Yes	Yes	No	588850510	afbd5fdb-a8e1-4313-acef-09872883f11b	2025-10-23 07:00:42			submitted_via_web		vjPvJRHBMydrYcpAtB4ohd		uuid:afbd5fdb-a8e1-4313-acef-09872883f11b	136
2025-10-23 08:00:40	2025-10-23 08:03:21	35	Divorced/Separated	Tertiary	Trader	Christianity	Rural	Yes	Friends/family	Yes		Yes	Antenatal care Skilled delivery Emergency obstetric care Postnatal care	1	1	1	1	0																To create awareness on IMSHIA services	Very satisfied	Yes	Yes	Kudos to imo state government. Keep the good work IMSHIA we move	588852349	3267cf14-51e0-4137-94f4-690e94555ac5	2025-10-23 07:03:23			submitted_via_web		vjPvJRHBMydrYcpAtB4ohd		uuid:3267cf14-51e0-4137-94f4-690e94555ac5	137
2025-10-23 08:03:21	2025-10-23 08:06:20	28	Married	Tertiary	Trader		Urban	Yes	Friends/family	Yes	Self	Yes	Skilled delivery Emergency obstetric care Postnatal care	0	1	1	1	0	Yes	3	Fully	Health center	Yes	Fully	Yes	Transport cost	0	0	1	0	0	0	0	Provision of funds	Satisfied	Yes	Yes		588854599	e84a8533-5a00-4517-be9e-277b5f418af1	2025-10-23 07:06:22			submitted_via_web		vjPvJRHBMydrYcpAtB4ohd		uuid:e84a8533-5a00-4517-be9e-277b5f418af1	138
2025-10-23 08:06:20	2025-10-23 08:07:37	55	Married	Secondary	Trading	Islam	Rural	Yes	Health facility	Yes	Government subsidy	Yes	Skilled delivery Emergency obstetric care Postnatal care	0	1	1	1	0	Yes	3	Not at all	General hospital	Yes	Not at all	Yes									Sensitization during women meeting	Satisfied	Yes	Yes	No	588855373	43c72f56-90c3-4429-989c-ad00cc9c980e	2025-10-23 07:07:41			submitted_via_web		vjPvJRHBMydrYcpAtB4ohd		uuid:43c72f56-90c3-4429-989c-ad00cc9c980e	139
2025-10-23 08:07:38	2025-10-23 08:09:15	32	Married	Secondary	Trading	Christianity	Urban	Yes	Health facility	Yes	Government subsidy	Yes	Antenatal care Skilled delivery Emergency obstetric care Postnatal care	1	1	1	1	0	Yes	4	Fully	Health center	Yes	Fully	Yes									Creat more awareness through churches	Very satisfied	Yes	Yes	Nil	588856617	f7c7cb3f-5df0-4c9a-aedf-ae7735d60bf6	2025-10-23 07:09:17			submitted_via_web		vjPvJRHBMydrYcpAtB4ohd		uuid:f7c7cb3f-5df0-4c9a-aedf-ae7735d60bf6	140
2025-10-23 08:09:15	2025-10-23 08:12:33	40	Married	Secondary	Tailor	Christianity	Urban	Yes	Health facility	Yes	Government subsidy	Yes	Antenatal care	1	0	0	0	0	Yes	5	Fully	Health center	Yes	Fully	Yes	Others	0	0	0	0	0	0	1	Create more awareness to the people	Satisfied	Yes	Yes	Paying health workers so that the can perform their Job very well	588859015	e344c535-a22b-49fd-b82a-f8142a97cb49	2025-10-23 07:12:35			submitted_via_web		vjPvJRHBMydrYcpAtB4ohd		uuid:e344c535-a22b-49fd-b82a-f8142a97cb49	141
2025-10-23 08:12:33	2025-10-23 08:15:05	40	Married	Tertiary	Farmer	Christianity	Rural			No		Yes	Antenatal care	1	0	0	0	0	Yes	4	Fully	Health center	Yes	Fully	Yes	Others	0	0	0	0	0	0	1	More registration	Very satisfied	Yes	Yes	Abeg make una try dey give health workers money so that then go they happen	588860831	34bacc55-5039-41fe-b386-c103c0748fd2	2025-10-23 07:15:08			submitted_via_web		vjPvJRHBMydrYcpAtB4ohd		uuid:34bacc55-5039-41fe-b386-c103c0748fd2	142
2025-10-23 08:15:06	2025-10-23 08:17:19	30	Married	Tertiary	Business	Christianity	Urban	Yes	Health facility	No		No							Yes		Fully	Health center	Yes	Fully	Yes	Others	0	0	0	0	0	0	1	Proper care services	Very satisfied	Yes	Yes	They should pay worker	588862279	b5d0a2f5-2f41-4c70-9d6b-b03777d5b630	2025-10-23 07:17:22			submitted_via_web		vjPvJRHBMydrYcpAtB4ohd		uuid:b5d0a2f5-2f41-4c70-9d6b-b03777d5b630	143
2025-10-23 08:17:19	2025-10-23 08:18:48	38	Married	Tertiary	Civil servant	Christianity	Rural	Yes	Health facility	Yes	Self	Yes	Antenatal care Skilled delivery Emergency obstetric care	1	1	1	0	0	Yes	6	Not at all	Teaching hospital	Yes	Not at all	Yes	Others	0	0	0	0	0	0	1	Health education	Very satisfied	Yes	Yes	To continue	588863314	62e3df34-7540-4475-b8fa-d659b6eeb267	2025-10-23 07:18:50			submitted_via_web		vjPvJRHBMydrYcpAtB4ohd		uuid:62e3df34-7540-4475-b8fa-d659b6eeb267	144
2025-10-23 08:18:48	2025-10-23 08:20:34	23	Married	Secondary	Tailor	Christianity	Rural	Yes											Yes		Not at all	Health center	Yes	Not at all	Yes											Yes	Yes		588864424	0eb26652-2efa-4984-95be-642bf50385be	2025-10-23 07:20:36			submitted_via_web		vjPvJRHBMydrYcpAtB4ohd		uuid:0eb26652-2efa-4984-95be-642bf50385be	145
2025-10-23 08:20:34	2025-10-23 08:21:50	35	Married	Tertiary	Teacher	Christianity	Rural			No		No							No			Health center	Yes	Not at all	No											Yes	Yes		588865360	3f46d284-dd07-4519-b0e3-2dce78a4cf63	2025-10-23 07:21:53			submitted_via_web		vjPvJRHBMydrYcpAtB4ohd		uuid:3f46d284-dd07-4519-b0e3-2dce78a4cf63	146
2025-10-23 08:21:51	2025-10-23 08:23:27	26	Married	Tertiary		Christianity	Rural	Yes	Health facility	No		No									Not at all	Health center	Yes	Not at all	No											Yes	Yes		588866771	f4c8c5dd-e91d-4f7a-a814-50160d675cae	2025-10-23 07:23:30			submitted_via_web		vjPvJRHBMydrYcpAtB4ohd		uuid:f4c8c5dd-e91d-4f7a-a814-50160d675cae	147
2025-10-23 08:23:27	2025-10-23 08:24:10	27	Married		Business	Christianity	Urban	No				No							No		Not at all	Health center	Yes	Not at all	No											Yes	Yes		588867289	b291a036-a307-4abb-9dad-b3a1e5ffaab2	2025-10-23 07:24:13			submitted_via_web		vjPvJRHBMydrYcpAtB4ohd		uuid:b291a036-a307-4abb-9dad-b3a1e5ffaab2	148
2025-10-23 08:24:10	2025-10-23 08:25:04	25	Married	Tertiary	Student	Christianity	Rural	Yes	Health facility	Yes	Government subsidy	Yes	Skilled delivery	0	1	0	0	0	Yes	16	Partially	Home	Yes	Fully	No	Distance to facility	0	1	0	0	0	0	0		Very satisfied	Yes	Yes		588867861	f12dd7c9-02d5-4427-a8d6-b6e793dedcda	2025-10-23 07:25:06			submitted_via_web		vjPvJRHBMydrYcpAtB4ohd		uuid:f12dd7c9-02d5-4427-a8d6-b6e793dedcda	149
2025-10-23 08:25:04	2025-10-23 08:25:52	30	Married	Tertiary	Business woman	Christianity	Rural	Yes	Health facility	Yes	Government subsidy	Yes	Skilled delivery	0	1	0	0	0	Yes		Partially	Health center	Yes	Fully	No	Transport cost	0	0	1	0	0	0	0		Satisfied	Yes	Yes		588868531	abc0e552-20e3-4677-a224-63fd6055886b	2025-10-23 07:25:54			submitted_via_web		vjPvJRHBMydrYcpAtB4ohd		uuid:abc0e552-20e3-4677-a224-63fd6055886b	150
2025-10-23 08:25:52	2025-10-23 08:27:46	35	Married	Tertiary	Teacher	Christianity	Rural	Yes	Health facility	Yes	Government subsidy	Yes	Skilled delivery	0	1	0	0	0	Yes	11	Partially	Health center	Yes	Fully	No	Distance to facility	0	1	0	0	0	0	0		Satisfied	Yes	Yes		588870132	539ebaf0-9912-461c-96ac-704b3e4a44fb	2025-10-23 07:27:48			submitted_via_web		vjPvJRHBMydrYcpAtB4ohd		uuid:539ebaf0-9912-461c-96ac-704b3e4a44fb	151
2025-10-23 08:27:46	2025-10-23 08:28:54	24	Married	Tertiary	Student	Christianity	Rural	Yes	Health facility	Yes	Government subsidy	Yes	Skilled delivery	0	1	0	0	0	Yes		Partially	Health center	Yes	Fully	No	Transport cost	0	0	1	0	0	0	0		Satisfied	Yes	Yes		588870926	750855cf-8075-4d1d-a8ab-e9ecceedf2f3	2025-10-23 07:28:56			submitted_via_web		vjPvJRHBMydrYcpAtB4ohd		uuid:750855cf-8075-4d1d-a8ab-e9ecceedf2f3	152
2025-10-23 08:28:54	2025-10-23 08:30:00	22	Married	Secondary	Business woman	Christianity	Rural	No		No									Yes	13	Not at all	Health center	Yes		No														588871649	513a507f-5da0-413e-bf2e-ae86da2ccf8d	2025-10-23 07:30:02			submitted_via_web		vjPvJRHBMydrYcpAtB4ohd		uuid:513a507f-5da0-413e-bf2e-ae86da2ccf8d	153
2025-10-23 08:30:00	2025-10-23 08:30:54	42	Married	Secondary	Business woman	Christianity	Rural	No		No		No							No			General hospital	Yes		Yes											No	No		588872254	b28aaa21-a823-4b2a-bec9-c7ec522c97ff	2025-10-23 07:30:56			submitted_via_web		vjPvJRHBMydrYcpAtB4ohd		uuid:b28aaa21-a823-4b2a-bec9-c7ec522c97ff	154
2025-10-23 08:30:54	2025-10-23 08:32:05	22	Married	Secondary	Business	Christianity	Rural			Yes	Government subsidy	Yes	Antenatal care Skilled delivery	1	1	0	0	0	Yes	2	Fully	Health center	Yes	Fully	Yes										Very satisfied	Yes	Yes	No	588873203	341cbf53-d68d-4efc-85e9-ad9bd062378f	2025-10-23 07:32:12			submitted_via_web		vjPvJRHBMydrYcpAtB4ohd		uuid:341cbf53-d68d-4efc-85e9-ad9bd062378f	155
2025-10-23 08:32:05	2025-10-23 08:33:49	27	Married	Tertiary	Self employed	Christianity	Urban	Yes	Friends/family	Yes	Self	Yes	Antenatal care Emergency obstetric care	1	0	1	0	0	Yes	3	Partially	Others	Yes	Not at all	Yes	Others	0	0	0	0	0	0	1	More awareness like MTN	Satisfied	Yes	Yes	Reduce their waiting period for CS	588874507	35ff8526-1f25-4673-8754-06df106e29dd	2025-10-23 07:33:52			submitted_via_web		vjPvJRHBMydrYcpAtB4ohd		uuid:35ff8526-1f25-4673-8754-06df106e29dd	156
2025-10-23 08:33:49	2025-10-23 08:35:34	34	Married	Tertiary	Business	Christianity	Urban	Yes	Friends/family	Yes	Spouse/family	Yes	Antenatal care Skilled delivery Emergency obstetric care Postnatal care	1	1	1	1	0	Yes	3	Partially	General hospital	No	Partially	Yes	Others	0	0	0	0	0	0	1	Ti educate women about the benefit of IMSHIA	Very satisfied	Yes	Yes	More awareness creation about IMSHIA	588876059	0a8fb406-1628-43c7-8779-ccf961289d1c	2025-10-23 07:35:38			submitted_via_web		vjPvJRHBMydrYcpAtB4ohd		uuid:0a8fb406-1628-43c7-8779-ccf961289d1c	157
2025-10-23 08:35:34	2025-10-23 08:36:30	32	Married	Secondary	Trading	Christianity	Rural	Yes	Health facility	Yes	Government subsidy	Yes	Antenatal care Skilled delivery Emergency obstetric care Postnatal care	1	1	1	1	0	Yes	2	Fully	Health center	Yes	Fully	Yes										Very satisfied	Yes	Yes		588876758	05a717b3-5c53-4685-ae36-6d3a3b35894b	2025-10-23 07:36:32			submitted_via_web		vjPvJRHBMydrYcpAtB4ohd		uuid:05a717b3-5c53-4685-ae36-6d3a3b35894b	158
2025-10-23 08:36:30	2025-10-23 08:38:28	27	Married	Primary	Farming	Christianity	Rural	Yes	Health facility	Yes	Government subsidy	Yes	Antenatal care Skilled delivery Emergency obstetric care Postnatal care	1	1	1	1	0	Yes	3	Fully	Health center	Yes	Fully	Yes	Others	0	0	0	0	0	0	1	Provision of more adequate find is needed	Satisfied	Yes	Yes	I appreciate our Governor for his Kindness and good work at least today am very healthy and strong I pray that God will strengthen him to save more lives for him	588878194	e3c581ce-d63c-49d0-b2ea-efc66a532954	2025-10-23 07:38:31			submitted_via_web		vjPvJRHBMydrYcpAtB4ohd		uuid:e3c581ce-d63c-49d0-b2ea-efc66a532954	159
2025-10-23 08:38:28	2025-10-23 08:40:04	32	Married	Secondary	House wife	Christianity	Rural	Yes	Health facility	Yes	Government subsidy	Yes	Antenatal care Skilled delivery Others	1	1	0	0	1	Yes	5	Fully	Health center	Yes	Fully	Yes	Distance to facility Transport cost	0	1	1	0	0	0	0	Provision of adequate fund is needed	Satisfied	Yes	Yes		588879315	9f846f0b-5356-486d-be56-b3ff4c688488	2025-10-23 07:40:06			submitted_via_web		vjPvJRHBMydrYcpAtB4ohd		uuid:9f846f0b-5356-486d-be56-b3ff4c688488	160
2025-10-23 08:40:04	2025-10-23 08:41:06	31	Married	Secondary	Trading	Christianity	Rural	Yes	Health facility	Yes	Government subsidy	Yes	Antenatal care Skilled delivery Emergency obstetric care Postnatal care	1	1	1	1	0	Yes	3	Fully	Health center	Yes	Fully	Yes										Very satisfied	Yes	Yes		588879996	22de0733-b665-47a4-bc83-3297f2eb10b1	2025-10-23 07:41:08			submitted_via_web		vjPvJRHBMydrYcpAtB4ohd		uuid:22de0733-b665-47a4-bc83-3297f2eb10b1	161
2025-10-23 08:41:06	2025-10-23 08:42:15	26				Christianity	Rural	Yes	Health facility	Yes	Government subsidy	Yes	Antenatal care Skilled delivery Emergency obstetric care Postnatal care	1	1	1	1	0	Yes	7	Fully	Health center	Yes	Fully	Yes	Distance to facility	0	1	0	0	0	0	0	Provision of more adequate funds for the service is needed	Very satisfied	Yes	Yes		588880923	e1ce48d2-2ab9-4883-8a9a-8f47ad9521ca	2025-10-23 07:42:17			submitted_via_web		vjPvJRHBMydrYcpAtB4ohd		uuid:e1ce48d2-2ab9-4883-8a9a-8f47ad9521ca	162
2025-10-23 08:42:15	2025-10-23 08:43:32	30	Married	Secondary	Trader	Christianity	Rural	Yes	Health facility	Yes	Government subsidy	Yes	Antenatal care Skilled delivery Emergency obstetric care Others	1	1	1	0	1	Yes	8	Fully	Health center	Yes	Fully	Yes									More fund to pronounce medicine	Very satisfied	Yes	Yes		588881840	db6c956b-0cbf-4040-ba93-5795ada83b4d	2025-10-23 07:43:34			submitted_via_web		vjPvJRHBMydrYcpAtB4ohd		uuid:db6c956b-0cbf-4040-ba93-5795ada83b4d	163
2025-10-23 08:43:32	2025-10-23 08:44:32	34	Married	Secondary	Trader	Christianity	Rural	Yes	Friends/family	Yes	Government subsidy	Yes	Antenatal care Skilled delivery Emergency obstetric care Postnatal care	1	1	1	1	0	Yes	8	Fully	Health center	Yes	Fully	Yes											Yes	Yes		588882495	6e6a11c1-63fd-44e9-af5a-0c8816374e2b	2025-10-23 07:44:34			submitted_via_web		vjPvJRHBMydrYcpAtB4ohd		uuid:6e6a11c1-63fd-44e9-af5a-0c8816374e2b	164
2025-10-23 08:44:33	2025-10-23 08:45:59	26	Married	Primary	Farming	Christianity	Urban	Yes	Community leader	Yes	Government subsidy	Yes	Antenatal care Skilled delivery Emergency obstetric care	1	1	1	0	0	Yes	2	Fully	Health center	Yes	Fully	Yes	Distance to facility Transport cost	0	1	1	0	0	0	0	More grace	Very satisfied	Yes	Yes	God bless	588883489	bf868cfd-1385-440c-874f-127b67bcebdb	2025-10-23 07:46:02			submitted_via_web		vjPvJRHBMydrYcpAtB4ohd		uuid:bf868cfd-1385-440c-874f-127b67bcebdb	165
2025-10-23 08:46:00	2025-10-23 08:47:36	37	Married	Secondary	Business	Islam	Rural	Yes	Friends/family	Yes	Spouse/family	No							No			Health center		Fully	Yes	Transport cost	0	0	1	0	0	0	0	Please to cover all necessary treatment in the hospital	Very satisfied	Yes	Yes		588884991	c4e2256b-b15c-4cf5-9358-fef8bfb31362	2025-10-23 07:47:38			submitted_via_web		vjPvJRHBMydrYcpAtB4ohd		uuid:c4e2256b-b15c-4cf5-9358-fef8bfb31362	166
2025-10-23 08:47:36	2025-10-23 08:49:22	35	Married	Tertiary	Civil servant	Christianity	Urban	Yes	Health facility	No		Yes	Antenatal care Emergency obstetric care Postnatal care	1	0	1	1	0	Yes	15	Not at all	Teaching hospital	Yes	Not at all	No	Others	0	0	0	0	0	0	1	Reducing the cost of IMSHIA registration	Satisfied	Yes	Yes	Bring down the cost of IMSHIA registration for easy accessibilities	588886300	b3fab2a6-1c91-45fc-8d7c-3ad61358ea0c	2025-10-23 07:49:24			submitted_via_web		vjPvJRHBMydrYcpAtB4ohd		uuid:b3fab2a6-1c91-45fc-8d7c-3ad61358ea0c	167
2025-10-23 08:49:23	2025-10-23 08:50:13	21	Single	Tertiary	Health worker	Christianity	Urban	Yes	Friends/family	No		Yes	Antenatal care Skilled delivery Emergency obstetric care Postnatal care	1	1	1	1	0	No			Health center	Yes	Fully	Yes	Others	0	0	0	0	0	0	1		Satisfied	Yes	Yes	No	588886919	d9bf779d-5d5b-44b8-8dd3-6626f8380121	2025-10-23 07:50:15			submitted_via_web		vjPvJRHBMydrYcpAtB4ohd		uuid:d9bf779d-5d5b-44b8-8dd3-6626f8380121	168
2025-10-23 08:50:13	2025-10-23 08:51:00	28	Married	Secondary	Trading	Christianity	Rural	Yes	Health facility	Yes	Government subsidy	Yes	Antenatal care Skilled delivery Emergency obstetric care Postnatal care	1	1	1	1	0	Yes	3	Fully	Health center	Yes	Fully	Yes										Very satisfied	Yes	Yes		588887628	b64900a6-baf3-4b7f-a2f8-73398411e2e5	2025-10-23 07:51:02			submitted_via_web		vjPvJRHBMydrYcpAtB4ohd		uuid:b64900a6-baf3-4b7f-a2f8-73398411e2e5	169
2025-10-23 08:51:00	2025-10-23 08:51:52	28	Single	Secondary		Christianity	Urban	Yes	Health facility	Yes	Government subsidy	Yes	Antenatal care Skilled delivery Emergency obstetric care Postnatal care	1	1	1	1	0	Yes	4	Fully	General hospital	Yes	Fully	Yes	Others	0	0	0	0	0	0	1	More awareness	Very satisfied	Yes	Yes	No	588888407	77d4d452-6757-4f0a-98bf-d01e5e8dfb73	2025-10-23 07:51:54			submitted_via_web		vjPvJRHBMydrYcpAtB4ohd		uuid:77d4d452-6757-4f0a-98bf-d01e5e8dfb73	170
2025-10-23 08:51:52	2025-10-23 08:54:16	25	Married	Secondary	Farming	Christianity	Rural	Yes	Health facility	Yes	Government subsidy	Yes	Antenatal care Skilled delivery Emergency obstetric care Postnatal care	1	1	1	1	0	Yes	5	Fully	Health center	Yes	Fully	Yes	Transport cost	0	0	1	0	0	0	0	Provision of ambulance motor for the emergency and referral	Very satisfied	Yes	Yes	I am very happy to be one of the beneficiaries may God bless all of you that make me to be a happiest woman and a healthy person today	588890234	3592815c-d032-4268-8211-ffd2e4b50cf2	2025-10-23 07:54:18			submitted_via_web		vjPvJRHBMydrYcpAtB4ohd		uuid:3592815c-d032-4268-8211-ffd2e4b50cf2	171
2025-10-23 08:54:16	2025-10-23 08:55:06	30	Married	Secondary	Business	Christianity	Rural	Yes	Health facility	Yes	Government subsidy	Yes	Emergency obstetric care Postnatal care Others	0	0	1	1	1	Yes	2	Fully	Health center	Yes	Fully	Yes										Very satisfied	Yes	Yes		588890856	ab34e89a-8be5-4c40-a13a-f9ec1f5c53a6	2025-10-23 07:55:08			submitted_via_web		vjPvJRHBMydrYcpAtB4ohd		uuid:ab34e89a-8be5-4c40-a13a-f9ec1f5c53a6	172
2025-10-23 08:55:06	2025-10-23 08:56:00	33	Married	Secondary	Trading	Christianity	Rural	Yes	Health facility	Yes	Government subsidy	Yes	Antenatal care Skilled delivery Emergency obstetric care	1	1	1	0	0	Yes		Fully	Health center	Yes	Fully	Yes										Very satisfied	Yes			588891466	a19bcef6-08cf-4aea-af54-2f974b22f2e8	2025-10-23 07:56:02			submitted_via_web		vjPvJRHBMydrYcpAtB4ohd		uuid:a19bcef6-08cf-4aea-af54-2f974b22f2e8	173
2025-10-23 08:56:00	2025-10-23 08:57:31	21	Married	Secondary	House wife	Christianity	Rural	Yes	Health facility	Yes	Government subsidy	Yes	Skilled delivery Emergency obstetric care Postnatal care Others	0	1	1	1	1	Yes	4	Partially	Others	Yes	Fully	Yes	Distance to facility Transport cost Cultural preference for home delivery	0	1	1	0	0	1	0	Lack of ambulance for emergency	Very satisfied	Yes	Yes	God bless them	588892469	e12bb55d-e57e-43dd-8299-4a6c62ab959b	2025-10-23 07:57:35			submitted_via_web		vjPvJRHBMydrYcpAtB4ohd		uuid:e12bb55d-e57e-43dd-8299-4a6c62ab959b	174
2025-10-23 08:57:32	2025-10-23 09:00:37	29	Married	Secondary	Farmer	Christianity	Rural	Yes	Health facility	Yes	Government subsidy	Yes	Antenatal care Skilled delivery Emergency obstetric care Others	1	1	1	0	1	Yes	5	Fully	Health center	Yes	Fully	Yes	Others	0	0	0	0	0	0	1	Creating more awareness	Very satisfied	Yes	Yes	Funding	588894862	c3bed97a-44c4-44c3-a86b-3eee9caa1ff8	2025-10-23 08:00:39			submitted_via_web		vjPvJRHBMydrYcpAtB4ohd		uuid:c3bed97a-44c4-44c3-a86b-3eee9caa1ff8	175
2025-10-23 09:00:37	2025-10-23 09:04:39	24	Married	Secondary	Hair dressing	Christianity	Rural	Yes	Health facility	Yes	Government subsidy	Yes	Antenatal care Skilled delivery Emergency obstetric care Postnatal care Others	1	1	1	1	1	Yes	4	Fully	Health center	Yes	Fully	Yes	Lack of awareness	1	0	0	0	0	0	0	Creating more awareness	Very satisfied	Yes	Yes	IMSHIA is the best	588898289	4c1818d7-0222-4ec4-835f-4e2c24c4ea72	2025-10-23 08:04:42			submitted_via_web		vjPvJRHBMydrYcpAtB4ohd		uuid:4c1818d7-0222-4ec4-835f-4e2c24c4ea72	176
2025-10-23 09:04:39	2025-10-23 09:05:44	32	Married	Secondary	Tailor	Christianity	Rural	Yes	Health facility	Yes	Government subsidy	Yes	Antenatal care Skilled delivery Emergency obstetric care Postnatal care	1	1	1	1	0	Yes	6	Fully	Health center	Yes	Fully	Yes	Lack of awareness	1	0	0	0	0	0	0	More awareness should be done	Very satisfied	Yes	Yes	More fund	588899190	4c2f5da6-f4be-4224-8fd6-efc376aa80d2	2025-10-23 08:05:46			submitted_via_web		vjPvJRHBMydrYcpAtB4ohd		uuid:4c2f5da6-f4be-4224-8fd6-efc376aa80d2	177
2025-10-23 09:05:44	2025-10-23 09:08:07	26	Married	Secondary	Caterer	Christianity	Rural	Yes	Friends/family	Yes	Government subsidy	Yes	Antenatal care Skilled delivery Emergency obstetric care Postnatal care	1	1	1	1	0	Yes	4	Fully	Health center	Yes	Fully	Yes	Lack of awareness	1	0	0	0	0	0	0	More fund	Very satisfied	Yes	Yes	Women love IMSHIA	588901436	583b5dc0-b015-4e73-a96d-e4762ddb4bf4	2025-10-23 08:08:10			submitted_via_web		vjPvJRHBMydrYcpAtB4ohd		uuid:583b5dc0-b015-4e73-a96d-e4762ddb4bf4	178
2025-10-23 09:08:08	2025-10-23 09:09:45	28	Married	Secondary	Hair dresser	Christianity	Rural	Yes	Health facility	Yes	Government subsidy	Yes	Antenatal care Skilled delivery Emergency obstetric care Postnatal care	1	1	1	1	0	Yes	4	Fully	Health center	Yes	Fully	Yes	Others	0	0	0	0	0	0	1	Creating more awareness	Very satisfied	Yes	Yes	Kudos to our more amiable Governor and to IMSHIA	588902799	75dbba3e-e71f-475e-b084-adf419cbfb62	2025-10-23 08:09:47			submitted_via_web		vjPvJRHBMydrYcpAtB4ohd		uuid:75dbba3e-e71f-475e-b084-adf419cbfb62	179
2025-10-23 09:09:45	2025-10-23 09:10:55	26	Married	Secondary	House wife	Christianity	Rural	Yes	Friends/family	Yes	Government subsidy	Yes	Antenatal care Skilled delivery Emergency obstetric care Postnatal care	1	1	1	1	0	Yes	5	Fully	Health center												More awareness	Very satisfied	Yes	Yes	More fund	588903726	430f70f2-9912-4b3a-b54b-dad91d986d62	2025-10-23 08:10:57			submitted_via_web		vjPvJRHBMydrYcpAtB4ohd		uuid:430f70f2-9912-4b3a-b54b-dad91d986d62	180
2025-10-23 09:10:55	2025-10-23 09:11:57	24	Married	Tertiary	Srmistress	Christianity	Rural	Yes	Health facility	Yes	Government subsidy	Yes	Antenatal care Skilled delivery Emergency obstetric care Postnatal care	1	1	1	1	0	Yes	6	Fully	Health center	Yes	Fully	Yes	Lack of awareness	1	0	0	0	0	0	0	More awareness	Very satisfied	Yes	Yes	IMSHIA is the best	588904516	c3bef24c-4b6c-4cc7-8374-c2a585208df0	2025-10-23 08:11:59			submitted_via_web		vjPvJRHBMydrYcpAtB4ohd		uuid:c3bef24c-4b6c-4cc7-8374-c2a585208df0	181
2025-10-23 09:11:57	2025-10-23 09:13:24	30	Married	Secondary	House wife	Christianity	Rural	Yes	Community leader	Yes	Government subsidy	Yes	Antenatal care Skilled delivery Emergency obstetric care Postnatal care Others	1	1	1	1	1	Yes	6	Fully	Health center	Yes	Fully	Yes	Others	0	0	0	0	0	0	1		Very satisfied	Yes	Yes	IMSHIA is all the way	588905593	b47ed194-731a-45f3-8e5a-ef1034420e56	2025-10-23 08:13:26			submitted_via_web		vjPvJRHBMydrYcpAtB4ohd		uuid:b47ed194-731a-45f3-8e5a-ef1034420e56	182
2025-10-23 09:13:24	2025-10-23 09:15:23	34	Married	Secondary	Farming	Christianity	Rural	Yes	Health facility	Yes	Government subsidy	Yes	Antenatal care Skilled delivery Emergency obstetric care Postnatal care	1	1	1	1	0	Yes	3	Fully	Health center	Yes	Fully	Yes	Distance to facility	0	1	0	0	0	0	0	To build health center close to the community or village	Very satisfied	Yes	Yes	May Almighty God bless them abundantly	588907263	931ff455-4b56-43d3-97df-7bb2f9c9205b	2025-10-23 08:15:26			submitted_via_web		vjPvJRHBMydrYcpAtB4ohd		uuid:931ff455-4b56-43d3-97df-7bb2f9c9205b	183
2025-10-23 09:15:23	2025-10-23 09:18:13	28	Married		Farming	Christianity	Rural	Yes	Health facility	Yes	Government subsidy	Yes	Antenatal care Skilled delivery Emergency obstetric care Postnatal care Others	1	1	1	1	1	Yes	6	Fully	Health center	Yes	Fully	Yes	Lack of awareness	1	0	0	0	0	0	0	Creating more awareness	Very satisfied	Yes	Yes	More funding	588909194	4542748f-a681-4b4f-ab3a-0509d68c3678	2025-10-23 08:18:16			submitted_via_web		vjPvJRHBMydrYcpAtB4ohd		uuid:4542748f-a681-4b4f-ab3a-0509d68c3678	184
2025-10-23 09:18:13	2025-10-23 09:20:28	25	Married	Secondary	Farming	Christianity	Rural	Yes	Community leader	Yes	Government subsidy	Yes	Antenatal care Emergency obstetric care	1	0	1	0	0	Yes	4	Fully	General hospital	Yes	Fully	Yes	Distance to facility Transport cost	0	1	1	0	0	0	0		Very satisfied	Yes	Yes	IMSHIA should keep it up	588910815	79837bb1-4e27-478e-83ce-4f97e293f53a	2025-10-23 08:20:31			submitted_via_web		vjPvJRHBMydrYcpAtB4ohd		uuid:79837bb1-4e27-478e-83ce-4f97e293f53a	185
2025-10-23 09:20:28	2025-10-23 09:23:49	25	Married	Tertiary	Civil servant	Christianity	Urban	Yes	Friends/family	Yes	Government subsidy	Yes	Antenatal care Skilled delivery	1	1	0	0	0	Yes	8	Fully	Health center	Yes	Fully	Yes	Distance to facility Transport cost Negative attitude of health workers	0	1	1	1	0	0	0	More awareness should be created general Should be put in facility nearest to them to avoid spending much transport	Very satisfied	Yes	Yes		588913687	c6b39c84-19d1-47f9-aeb2-eeef8b8036cc	2025-10-23 08:23:51			submitted_via_web		vjPvJRHBMydrYcpAtB4ohd		uuid:c6b39c84-19d1-47f9-aeb2-eeef8b8036cc	186
2025-10-23 09:23:49	2025-10-23 09:25:06	30	Married	Secondary	Bus	Christianity	Urban	Yes	Health facility	Yes	Government subsidy	Yes	Antenatal care Skilled delivery	1	1	0	0	0	Yes	3	Fully	Health center	Yes	Fully	Yes	Distance to facility Transport cost	0	1	1	0	0	0	0		Very satisfied	Yes	Yes		588914649	e37a0050-6000-4ed4-a4a8-79711fdc44de	2025-10-23 08:25:08			submitted_via_web		vjPvJRHBMydrYcpAtB4ohd		uuid:e37a0050-6000-4ed4-a4a8-79711fdc44de	187
2025-10-23 09:25:06	2025-10-23 09:26:05	27	Married	Tertiary	Civil servant	Christianity	Urban	Yes	Radio/TV	Yes	Government subsidy	Yes	Antenatal care Skilled delivery Emergency obstetric care	1	1	1	0	0	Yes	5	Fully	Teaching hospital	Yes	Fully	No										Very satisfied	Yes	Yes		588915400	7d52ce45-2419-40ae-a96c-8c75d906e23b	2025-10-23 08:26:07			submitted_via_web		vjPvJRHBMydrYcpAtB4ohd		uuid:7d52ce45-2419-40ae-a96c-8c75d906e23b	188
2025-10-23 09:26:05	2025-10-23 09:27:50	35	Married	Tertiary	Nurse	Christianity		Yes	Radio/TV	Yes	Government subsidy	Yes	Antenatal care Skilled delivery Emergency obstetric care Postnatal care	1	1	1	1	0	Yes	6	Fully	Others	Yes	Fully	Yes	Transport cost	0	0	1	0	0	0	0	To create more awareness, especially in local language	Very satisfied	Yes	Yes	IMSHIA to keep the program running	588916977	1f08b2bf-7cb9-4364-b131-3c819b80c433	2025-10-23 08:27:53			submitted_via_web		vjPvJRHBMydrYcpAtB4ohd		uuid:1f08b2bf-7cb9-4364-b131-3c819b80c433	189
2025-10-23 09:27:51	2025-10-23 09:29:40	35	Married	Tertiary	Teaching	Christianity		Yes	Radio/TV	Yes	Government subsidy	Yes	Antenatal care Skilled delivery Emergency obstetric care	1	1	1	0	0	Yes	5	Fully	Teaching hospital	Yes	Fully	Yes	Others	0	0	0	0	0	0	1	More awareness	Very satisfied	Yes	Yes	To keep the program going	588918508	44d4fcf4-b54a-4e01-b9f1-05299846d95b	2025-10-23 08:29:42			submitted_via_web		vjPvJRHBMydrYcpAtB4ohd		uuid:44d4fcf4-b54a-4e01-b9f1-05299846d95b	190
2025-10-23 09:29:40	2025-10-23 09:31:09	45	Widowed	Secondary	Self employed	Christianity	Urban	Yes	Radio/TV	Yes	Self	Yes	Antenatal care Skilled delivery Emergency obstetric care	1	1	1	0	0	Yes	4	Fully	Others	Yes	Fully	Yes	Transport cost	0	0	1	0	0	0	0		Very satisfied	Yes	Yes	Not to stop the program	588919695	33d062ee-77ac-4843-bec6-19d52409e88d	2025-10-23 08:31:11			submitted_via_web		vjPvJRHBMydrYcpAtB4ohd		uuid:33d062ee-77ac-4843-bec6-19d52409e88d	191
2025-10-23 09:31:09	2025-10-23 09:34:07	22	Married	Secondary	Trader	Christianity	Rural	Yes	Health facility	Yes	Government subsidy	Yes	Antenatal care Skilled delivery Emergency obstetric care	1	1	1	0	0	Yes	7	Fully	Health center	Yes	Fully		Distance to facility Transport cost	0	1	1	0	0	0	0		Very satisfied	Yes	Yes		588921859	29fa440c-ee98-442b-ba8a-655c62a6dcad	2025-10-23 08:34:09			submitted_via_web		vjPvJRHBMydrYcpAtB4ohd		uuid:29fa440c-ee98-442b-ba8a-655c62a6dcad	192
2025-10-23 09:34:07	2025-10-23 09:36:19	40	Divorced/Separated	Secondary	Business	Christianity	Urban	Yes	Radio/TV	Yes	Government subsidy	Yes	Antenatal care Skilled delivery Emergency obstetric care	1	1	1	0	0	Yes	3	Fully	Health center	Yes	Fully	Yes	Transport cost	0	0	1	0	0	0	0	More awareness	Satisfied	Yes	Yes	IMSHIA should keep the program	588923797	a77ac6c5-559c-4116-b1d6-01c19f064852	2025-10-23 08:36:24			submitted_via_web		vjPvJRHBMydrYcpAtB4ohd		uuid:a77ac6c5-559c-4116-b1d6-01c19f064852	193
2025-10-23 09:36:20	2025-10-23 09:37:33	20	Married	Secondary	House wife	Christianity	Rural	Yes	Community leader	Yes	Government subsidy	Yes	Antenatal care Skilled delivery	1	1	0	0	0	Yes	5	Fully	Health center	No	Fully	No	Others	0	0	0	0	0	0	1	More information	Very satisfied	Yes	Yes		588924590	7cd093e2-bb73-49d0-84f6-612d562fb61a	2025-10-23 08:37:36			submitted_via_web		vjPvJRHBMydrYcpAtB4ohd		uuid:7cd093e2-bb73-49d0-84f6-612d562fb61a	194
2025-10-22 23:26:17	2025-10-23 11:06:43	28	Married	Secondary	Trading	Christianity	Rural	Yes	Health facility	Yes	Government subsidy	Yes	Antenatal care Skilled delivery Emergency obstetric care	1	1	1	0	0	Yes	5	Fully	Health center	Yes	Fully	Yes	Others	0	0	0	0	0	0	1	To accredited all the pHC's in all the political ward	Very satisfied	Yes	Yes	No	588997380	3616a0a9-4f87-47ea-92f4-13c544a0c7d6	2025-10-23 10:06:44			submitted_via_web		vjPvJRHBMydrYcpAtB4ohd		uuid:3616a0a9-4f87-47ea-92f4-13c544a0c7d6	195
2025-10-23 11:06:43	2025-10-23 11:08:33	32	Married	Secondary	Fashion designer	Christianity	Urban	Yes	Community leader	Yes	Government subsidy	Yes	Antenatal care Skilled delivery Emergency obstetric care Postnatal care Others	1	1	1	1	1	Yes	6	Fully	Health center	Yes	Fully	Yes	Distance to facility Transport cost	0	1	1	0	0	0	0	Provision. Of more health facilities in our land	Very satisfied	Yes	Yes	No	588999326	2fba3083-6a85-48db-89c6-f1be767f4c9a	2025-10-23 10:08:35			submitted_via_web		vjPvJRHBMydrYcpAtB4ohd		uuid:2fba3083-6a85-48db-89c6-f1be767f4c9a	196
2025-10-23 11:08:34	2025-10-23 11:10:22	30	Married	No formal education	House wife	Christianity	Rural	Yes	Health facility	Yes	Government subsidy	Yes	Antenatal care Skilled delivery Emergency obstetric care Postnatal care Others	1	1	1	1	1	Yes	5	Fully	Health center	Yes	Fully	Yes	Distance to facility Transport cost Others	0	1	1	0	0	0	1	More health workers needed	Very satisfied	Yes	Yes	No	589001050	da31a38e-1979-4599-94b5-28aac98fdadb	2025-10-23 10:10:23			submitted_via_web		vjPvJRHBMydrYcpAtB4ohd		uuid:da31a38e-1979-4599-94b5-28aac98fdadb	197
2025-10-23 11:10:22	2025-10-23 11:12:17	23	Single	Secondary	Nil	Christianity	Rural	Yes	Friends/family	Yes	Government subsidy	Yes	Antenatal care Skilled delivery Emergency obstetric care Postnatal care Others	1	1	1	1	1	Yes	4	Fully	Health center	Yes	Fully	Yes	Distance to facility Transport cost	0	1	1	0	0	0	0	More health workers	Very satisfied	Yes	Yes	Government should continue to provide for health services	589003031	aa9f5b83-7f92-4258-848e-077931b7ebb1	2025-10-23 10:12:18			submitted_via_web		vjPvJRHBMydrYcpAtB4ohd		uuid:aa9f5b83-7f92-4258-848e-077931b7ebb1	198
2025-10-23 11:12:17	2025-10-23 11:13:40	35	Married	Secondary	Stylist	Christianity	Rural	Yes	Health facility	Yes	Government subsidy	Yes	Antenatal care Skilled delivery Emergency obstetric care Postnatal care Others	1	1	1	1	1	Yes	7	Fully	Health center	Yes	Fully	Yes	Distance to facility Transport cost	0	1	1	0	0	0	0	Create more health centres	Very satisfied	Yes	Yes	No	589004508	8ba40154-db9c-4d7d-b9c6-78c28a70f5eb	2025-10-23 10:13:42			submitted_via_web		vjPvJRHBMydrYcpAtB4ohd		uuid:8ba40154-db9c-4d7d-b9c6-78c28a70f5eb	199
2025-10-23 11:13:40	2025-10-23 11:15:17	24	Married	Secondary	House wife	Christianity	Rural	Yes	Health facility	Yes	Government subsidy	Yes	Antenatal care Skilled delivery Emergency obstetric care Postnatal care Others	1	1	1	1	1	Yes	8	Fully	Others	Yes	Fully	Yes	Distance to facility Transport cost	0	1	1	0	0	0	0		Very satisfied	Yes	Yes		589006029	61d4b450-85f2-4fae-938f-94275dd0d831	2025-10-23 10:15:22			submitted_via_web		vjPvJRHBMydrYcpAtB4ohd		uuid:61d4b450-85f2-4fae-938f-94275dd0d831	200
2025-10-23 11:15:17	2025-10-23 11:16:30	19	Single	Primary	Nil	Christianity	Rural	Yes	Health facility	Yes	Government subsidy	Yes	Antenatal care Skilled delivery Emergency obstetric care Postnatal care	1	1	1	1	0	Yes	5	Fully	Health center	Yes	Fully	Yes	Distance to facility Transport cost	0	1	1	0	0	0	0	Bring more workers	Very satisfied	Yes	Yes		589007106	f1841c1d-7a59-4822-805b-6c01cffce70a	2025-10-23 10:16:31			submitted_via_web		vjPvJRHBMydrYcpAtB4ohd		uuid:f1841c1d-7a59-4822-805b-6c01cffce70a	201
2025-10-23 11:16:30	2025-10-23 11:18:20	26	Married	Secondary	Artisan	Christianity	Rural	Yes	Health facility	Yes	Government subsidy	Yes	Antenatal care Skilled delivery Emergency obstetric care Postnatal care	1	1	1	1	0	Yes	4	Fully	Home	No		Yes	Distance to facility Transport cost	0	1	1	0	0	0	0		Very satisfied	Yes	Yes		589008732	88c1339a-b933-446f-a20a-048b0a411519	2025-10-23 10:18:21			submitted_via_web		vjPvJRHBMydrYcpAtB4ohd		uuid:88c1339a-b933-446f-a20a-048b0a411519	202
2025-10-23 11:18:20	2025-10-23 11:19:54	28	Married	Secondary	Trader	Christianity	Rural			Yes	Government subsidy	Yes	Antenatal care Skilled delivery Emergency obstetric care Postnatal care Others	1	1	1	1	1	Yes	6	Fully	General hospital	Yes	Fully		Distance to facility Transport cost	0	1	1	0	0	0	0	Provision of more health personnel	Very satisfied	Yes	Yes		589010047	fc86010a-e8f7-49ae-83fd-425d2078b9e2	2025-10-23 10:19:57			submitted_via_web		vjPvJRHBMydrYcpAtB4ohd		uuid:fc86010a-e8f7-49ae-83fd-425d2078b9e2	203
2025-10-23 11:19:55	2025-10-23 11:21:24	29	Single	Primary	Trader	Christianity	Rural	Yes	Others	No		No							Yes	5	Not at all	Others	No	Not at all	No	Others	0	0	0	0	0	0	1			Yes	Yes		589011507	4c6cad9b-763c-4bc6-a400-bc18d6ffa722	2025-10-23 10:21:25			submitted_via_web		vjPvJRHBMydrYcpAtB4ohd		uuid:4c6cad9b-763c-4bc6-a400-bc18d6ffa722	204
2025-10-23 11:21:24	2025-10-23 11:32:31	31	Married	Tertiary	Trader	Christianity	Urban	Yes	Friends/family	Yes	Government subsidy	Yes	Antenatal care Skilled delivery Emergency obstetric care Postnatal care Others	1	1	1	1	1	Yes	2	Partially	Teaching hospital	Yes	Fully	Yes	Others	0	0	0	0	0	0	1	More awareness and sensitization	Very satisfied	Yes	Yes	Keep it up	589021827	99ce5e61-4252-489f-b8a7-94353c1a29ae	2025-10-23 10:32:32			submitted_via_web		vjPvJRHBMydrYcpAtB4ohd		uuid:99ce5e61-4252-489f-b8a7-94353c1a29ae	205
2025-10-23 11:32:31	2025-10-23 11:34:19	36	Married	Secondary	Business	Christianity	Urban	Yes	Community leader	Yes	Government subsidy	Yes	Antenatal care Skilled delivery Emergency obstetric care	1	1	1	0	0	Yes	3	Fully	General hospital	Yes	Fully	Yes									Jingles in local dialect	Very satisfied	Yes	Yes	Government has done well for women	589023433	66466cd7-a8c9-4f25-9cc5-85f5bea611f6	2025-10-23 10:34:20			submitted_via_web		vjPvJRHBMydrYcpAtB4ohd		uuid:66466cd7-a8c9-4f25-9cc5-85f5bea611f6	206
2025-10-23 11:34:19	2025-10-23 11:36:24	34	Married	Secondary	Business	Christianity	Urban	Yes	Health facility	Yes	Government subsidy	Yes	Antenatal care Skilled delivery Emergency obstetric care	1	1	1	0	0	Yes	4	Fully	General hospital	Yes	Fully	Yes									Tge insurance desk officer at general hospital need to be more oversight and orientative	Very satisfied	Yes	Yes	Imsha should keep it up	589025191	c5f4466b-b25b-4ff6-ab03-2c1f2e93e7d6	2025-10-23 10:36:25			submitted_via_web		vjPvJRHBMydrYcpAtB4ohd		uuid:c5f4466b-b25b-4ff6-ab03-2c1f2e93e7d6	207
2025-10-23 11:36:24	2025-10-23 11:38:57	38	Married	Tertiary	Teacher(Private school)	Christianity	Urban	Yes	Friends/family	Yes	Government subsidy	Yes	Antenatal care Skilled delivery Emergency obstetric care Postnatal care	1	1	1	1	0	Yes	6	Fully	General hospital	Yes	Fully	Yes	Others	0	0	0	0	0	0	1	IMO state specialist IMSHIA Desk officer behaviour	Very satisfied	Yes	Yes	Please keep it up	589027487	28f8b7fe-c755-44b9-84a6-818c26ffd163	2025-10-23 10:38:58			submitted_via_web		vjPvJRHBMydrYcpAtB4ohd		uuid:28f8b7fe-c755-44b9-84a6-818c26ffd163	208
2025-10-23 11:38:57	2025-10-23 11:40:16	35	Single	Secondary	Trader	Christianity	Urban	Yes	Health facility	Yes	Government subsidy	Yes	Antenatal care Skilled delivery Emergency obstetric care Postnatal care Others	1	1	1	1	1	Yes	8	Fully	Others	Yes	Fully	Yes									Nothing	Very satisfied	Yes	Yes		589028617	65a1d3eb-c658-4cec-bb26-0122052b2d6d	2025-10-23 10:40:17			submitted_via_web		vjPvJRHBMydrYcpAtB4ohd		uuid:65a1d3eb-c658-4cec-bb26-0122052b2d6d	209
2025-10-23 11:40:16	2025-10-23 11:41:47	22	Married	Secondary	House wife	Christianity	Urban	Yes	Health facility	Yes	Government subsidy	Yes	Antenatal care Skilled delivery Emergency obstetric care	1	1	1	0	0	Yes	8	Fully	Others	Yes	Fully	Yes	Others	0	0	0	0	0	0	1	Nothing for now	Very satisfied	Yes	Yes		589029840	74f6f927-2aff-4bde-9cca-5746e8485a8c	2025-10-23 10:41:48			submitted_via_web		vjPvJRHBMydrYcpAtB4ohd		uuid:74f6f927-2aff-4bde-9cca-5746e8485a8c	210
2025-10-23 11:41:47	2025-10-23 11:43:17	38	Married			Christianity	Urban	Yes	Friends/family	Yes	Government subsidy	Yes	Antenatal care Skilled delivery Emergency obstetric care Postnatal care	1	1	1	1	0	Yes	3	Fully	General hospital	Yes	Fully	Yes	Others	0	0	0	0	0	0	1		Very satisfied	Yes	Yes	Add rhesus factor care	589031023	7fcc64c2-c376-460c-9ba3-21192371ea0b	2025-10-23 10:43:18			submitted_via_web		vjPvJRHBMydrYcpAtB4ohd		uuid:7fcc64c2-c376-460c-9ba3-21192371ea0b	211
2025-10-23 11:43:17	2025-10-23 11:44:16	21	Married	Secondary	House wife	Islam	Rural	Yes	Friends/family	Yes	Government subsidy	Yes	Antenatal care Skilled delivery	1	1	0	0	0	Yes	3	Fully	Health center	Yes	Fully	Yes											Yes	Yes		589031998	575b567c-4ca7-4331-bac0-d3fc599f3e4d	2025-10-23 10:44:17			submitted_via_web		vjPvJRHBMydrYcpAtB4ohd		uuid:575b567c-4ca7-4331-bac0-d3fc599f3e4d	212
2025-10-23 11:44:16	2025-10-23 11:45:26	42	Married	Secondary	Business	Christianity	Urban	Yes	Radio/TV	Yes	Government subsidy	Yes	Antenatal care Skilled delivery Emergency obstetric care	1	1	1	0	0	Yes	4	Fully	Health center	Yes	Fully	Yes									Continue awareness	Very satisfied	Yes	Yes		589033295	55fb210d-b5a6-4569-925a-ea87717e571b	2025-10-23 10:45:46			submitted_via_web		vjPvJRHBMydrYcpAtB4ohd		uuid:55fb210d-b5a6-4569-925a-ea87717e571b	213
2025-10-23 11:45:26	2025-10-23 11:46:36	18	Single	Secondary		Christianity	Urban	Yes	Community leader	Yes	Government subsidy	Yes	Antenatal care Emergency obstetric care	1	0	1	0	0	Yes	8	Fully	Health center	Yes	Fully	Yes										Very satisfied	Yes	Yes		589033975	7d21d2e4-52fd-44c0-8230-59f31728a775	2025-10-23 10:46:38			submitted_via_web		vjPvJRHBMydrYcpAtB4ohd		uuid:7d21d2e4-52fd-44c0-8230-59f31728a775	214
2025-10-23 11:46:37	2025-10-23 11:48:50	34	Married	Secondary	Business woman	Christianity	Rural	Yes	Health facility	Yes	Government subsidy	Yes	Antenatal care	1	0	0	0	0	Yes	16	Fully	Health center	Yes	Fully	Yes	Distance to facility Transport cost	0	1	1	0	0	0	0		Satisfied	Yes	Yes	No	589036038	f7a52a0a-b91c-4607-98b6-d90343fb2bd5	2025-10-23 10:48:51			submitted_via_web		vjPvJRHBMydrYcpAtB4ohd		uuid:f7a52a0a-b91c-4607-98b6-d90343fb2bd5	215
2025-10-23 11:48:51	2025-10-23 11:50:13	38	Married	Secondary	Farmer	Christianity	Rural	Yes	Health facility	Yes	Government subsidy	Yes	Antenatal care	1	0	0	0	0	Yes			Health center	Yes	Fully	Yes	Lack of awareness Distance to facility	1	1	0	0	0	0	0		Satisfied	Yes	Yes	No	589037271	473b1bb8-a111-4170-aeeb-ee938c1a1861	2025-10-23 10:50:14			submitted_via_web		vjPvJRHBMydrYcpAtB4ohd		uuid:473b1bb8-a111-4170-aeeb-ee938c1a1861	216
2025-10-23 11:50:13	2025-10-23 11:51:51	32	Married	Tertiary	Farmer	Christianity	Rural	Yes	Community leader	Yes	Government subsidy	Yes	Antenatal care	1	0	0	0	0	Yes	12	Fully	Health center	Yes	Fully	Yes	Distance to facility Transport cost	0	1	1	0	0	0	0		Very satisfied		Yes	No	589038687	3a247231-1c76-4e54-9c6d-bef06c3ed094	2025-10-23 10:51:52			submitted_via_web		vjPvJRHBMydrYcpAtB4ohd		uuid:3a247231-1c76-4e54-9c6d-bef06c3ed094	217
2025-10-23 11:51:51	2025-10-23 11:53:57	21	Married	Secondary	Hair dresser	Christianity	Rural	Yes	Health facility	Yes	Government subsidy	Yes	Antenatal care Skilled delivery	1	1	0	0	0	Yes	4	Fully	Health center	Yes	Fully	Yes	Distance to facility Transport cost	0	1	1	0	0	0	0	Create more awareness about this programme	Very satisfied	Yes	Yes	Let tge programme continue	589040232	60b93201-c291-4b62-b093-91fec7247f4b	2025-10-23 10:53:58			submitted_via_web		vjPvJRHBMydrYcpAtB4ohd		uuid:60b93201-c291-4b62-b093-91fec7247f4b	218
2025-10-23 11:53:57	2025-10-23 11:55:15	27	Single	Tertiary	Teacher	Christianity	Rural	Yes	Health facility	Yes		Yes	Antenatal care Skilled delivery Emergency obstetric care Postnatal care Others	1	1	1	1	1	Yes	5	Fully	Health center	Yes	Fully	Yes	Transport cost	0	0	1	0	0	0	0		Very satisfied	Yes	Yes	This programme be sustained	589041377	0cf913ff-e7f5-43d8-a903-114a393a4be9	2025-10-23 10:55:16			submitted_via_web		vjPvJRHBMydrYcpAtB4ohd		uuid:0cf913ff-e7f5-43d8-a903-114a393a4be9	219
2025-10-23 11:55:15	2025-10-23 11:56:48	41	Single	Secondary	Trader	Christianity	Rural	Yes	Health facility	Yes	Government subsidy	Yes	Skilled delivery Postnatal care	0	1	0	1	0	Yes	6	Fully	Health center			Yes	Distance to facility Transport cost	0	1	1	0	0	0	0	Sensitisation to community	Very satisfied	Yes	Yes	No	589042916	9762aa0b-e042-44d9-8532-c528a6f6eb24	2025-10-23 10:56:49			submitted_via_web		vjPvJRHBMydrYcpAtB4ohd		uuid:9762aa0b-e042-44d9-8532-c528a6f6eb24	220
2025-10-23 11:56:48	2025-10-23 11:58:23	37	Married	Secondary	Trader	Christianity	Rural	Yes	Health facility	Yes	Government subsidy	Yes	Antenatal care Skilled delivery Postnatal care	1	1	0	1	0	Yes	7	Fully	Health center	Yes	Fully	Yes									Build acco.odation for workers so they can be resident	Very satisfied	Yes	Yes	No	589044499	2599d02a-448f-49c1-b9d6-ab2a0356ffdf	2025-10-23 10:58:23			submitted_via_web		vjPvJRHBMydrYcpAtB4ohd		uuid:2599d02a-448f-49c1-b9d6-ab2a0356ffdf	221
2025-10-23 11:58:23	2025-10-23 12:00:30	28	Single	Secondary	Petty trader	Christianity	Rural	Yes	Health facility	Yes	Government subsidy	Yes	Antenatal care Skilled delivery	1	1	0	0	0	Yes		Fully	Health center	Yes	Fully	Yes	Lack of awareness	1	0	0	0	0	0	0	More workers to assist the ones in The facility	Very satisfied	Yes	Yes		589046567	dfb8164e-dc53-4b95-b39b-096aafc6189f	2025-10-23 11:00:31			submitted_via_web		vjPvJRHBMydrYcpAtB4ohd		uuid:dfb8164e-dc53-4b95-b39b-096aafc6189f	222
2025-10-23 12:00:30	2025-10-23 12:01:50	38	Divorced/Separated		House wife	Christianity	Rural	Yes	Friends/family	Yes		Yes	Antenatal care Skilled delivery Emergency obstetric care Postnatal care	1	1	1	1	0	Yes	8	Fully	General hospital	Yes	Fully	Yes	Others	0	0	0	0	0	0	1		Very satisfied	Yes	Yes		589047890	cc7d54d8-df23-4578-a4cd-458856b48234	2025-10-23 11:01:50			submitted_via_web		vjPvJRHBMydrYcpAtB4ohd		uuid:cc7d54d8-df23-4578-a4cd-458856b48234	223
2025-10-23 12:01:50	2025-10-23 12:03:28	29	Single	Secondary	Trader	Christianity	Rural	Yes	Health facility	Yes		Yes	Postnatal care	0	0	0	1	0	Yes	8	Fully	Health center	Yes	Fully	Yes	Others	0	0	0	0	0	0	1	Imshaia is already helpful	Very satisfied	Yes	Yes		589049365	d8415e8c-6ac0-48e9-af13-617baf6ecac4	2025-10-23 11:03:29			submitted_via_web		vjPvJRHBMydrYcpAtB4ohd		uuid:d8415e8c-6ac0-48e9-af13-617baf6ecac4	224
2025-10-23 12:03:28	2025-10-23 12:25:19	32	Single	Tertiary	Farmer	Christianity	Rural	Yes	Health facility	Yes	Spouse/family	Yes	Antenatal care Postnatal care	1	0	0	1	0	Yes	7	Fully	General hospital	Yes	Fully	Yes	Others	0	0	0	0	0	0	1	Sensitization	Very satisfied	Yes	Yes	Excellent job, the health care workers are really doing well in the various health	589070808	446511db-91b8-4e98-8181-045adb1bae89	2025-10-23 11:25:19			submitted_via_web		vjPvJRHBMydrYcpAtB4ohd		uuid:446511db-91b8-4e98-8181-045adb1bae89	225
2025-10-23 12:25:19	2025-10-23 12:27:10	28	Single	Tertiary	Hair stylist	Christianity	Rural	Yes	Radio/TV	Yes	Self	Yes	Others	0	0	0	0	1	No							Others	0	0	0	0	0	0	1	Advocacy	Very satisfied	Yes	Yes	Impressive work	589072463	38ed78bf-5e20-488b-be70-e77a1637163b	2025-10-23 11:27:11			submitted_via_web		vjPvJRHBMydrYcpAtB4ohd		uuid:38ed78bf-5e20-488b-be70-e77a1637163b	226
2025-10-23 12:27:10	2025-10-23 12:29:19	21	Married	Tertiary	Farmer	Christianity	Rural	Yes	Radio/TV	Yes	Spouse/family	Yes	Antenatal care	1	0	0	0	0	Yes	5	Fully	Health center	Yes	Fully	Yes	Others	0	0	0	0	0	0	1	Sensitization	Very satisfied	Yes	Yes	Imshia is the best	589074244	a4cd96d0-936a-4c27-ae7c-86744da94d2a	2025-10-23 11:29:19			submitted_via_web		vjPvJRHBMydrYcpAtB4ohd		uuid:a4cd96d0-936a-4c27-ae7c-86744da94d2a	227
2025-10-23 12:29:19	2025-10-23 12:30:44	30	Single	Tertiary	Trader	Christianity	Rural	Yes	Community leader	Yes		Yes	Skilled delivery	0	1	0	0	0	Yes	7	Fully	General hospital	Yes	Fully	Yes	Others	0	0	0	0	0	0	1	Sensitization	Very satisfied	Yes	Yes	Satisfactory	589075415	fcd64f17-2a13-47ed-b309-f66ac630eb61	2025-10-23 11:30:44			submitted_via_web		vjPvJRHBMydrYcpAtB4ohd		uuid:fcd64f17-2a13-47ed-b309-f66ac630eb61	228
2025-10-23 12:30:44	2025-10-23 12:32:42	38	Married		Trader	Christianity	Rural	Yes	Health facility	Yes	Self	Yes	Antenatal care	1	0	0	0	0	Yes	7	Fully	Health center	Yes	Fully	Yes									Enlightenment	Very satisfied	Yes	Yes	Keep doing God's work	589077229	7f0ee6cd-032f-4eaf-85a0-f41268b14fd0	2025-10-23 11:32:42			submitted_via_web		vjPvJRHBMydrYcpAtB4ohd		uuid:7f0ee6cd-032f-4eaf-85a0-f41268b14fd0	229
2025-10-23 12:32:42	2025-10-23 12:34:17	30	Married	Tertiary	Hair dresser	Christianity	Rural	Yes	Community leader	Yes	Government subsidy	Yes	Antenatal care	1	0	0	0	0	Yes	7		Health center	Yes	Fully	Yes	Others	0	0	0	0	0	0	1	Enlightenment	Very satisfied	Yes	Yes	Imshia is irreplaceable	589078643	9031c44d-71ed-463a-b24b-101f8736bdca	2025-10-23 11:34:18			submitted_via_web		vjPvJRHBMydrYcpAtB4ohd		uuid:9031c44d-71ed-463a-b24b-101f8736bdca	230
2025-10-23 12:34:17	2025-10-23 12:35:41	18	Single	Secondary	Family dependent	Christianity	Rural	Yes	Health facility	Yes	Government subsidy	Yes	Antenatal care Emergency obstetric care	1	0	1	0	0	Yes	6	Fully	Health center	Yes	Fully	Yes										Very satisfied	Yes	Yes	No	589079843	c239e255-4044-4947-96d3-05ae857a81e3	2025-10-23 11:35:42			submitted_via_web		vjPvJRHBMydrYcpAtB4ohd		uuid:c239e255-4044-4947-96d3-05ae857a81e3	231
2025-10-23 12:35:41	2025-10-23 12:36:44	31	Divorced/Separated	Secondary	Self employed	Christianity	Urban	Yes	Radio/TV	Yes	Spouse/family	Yes	Emergency obstetric care	0	0	1	0	0	Yes	2	Partially	Others	Yes	Fully	Yes										Very satisfied	Yes	Yes		589080817	670cad60-c671-4ba6-b85f-b3e00aaf7b76	2025-10-23 11:36:45			submitted_via_web		vjPvJRHBMydrYcpAtB4ohd		uuid:670cad60-c671-4ba6-b85f-b3e00aaf7b76	232
2025-10-23 12:36:45	2025-10-23 12:37:57	20	Married	Secondary	House wife	Christianity	Rural	Yes	Health facility	Yes	Government subsidy	Yes	Antenatal care Skilled delivery Emergency obstetric care	1	1	1	0	0	Yes	1	Fully	Health center	Yes	Fully	Yes										Satisfied	Yes	Yes	Keep up the programme	589081825	9bd8c6ab-f417-401d-baf3-b5925abea1b6	2025-10-23 11:37:58			submitted_via_web		vjPvJRHBMydrYcpAtB4ohd		uuid:9bd8c6ab-f417-401d-baf3-b5925abea1b6	233
2025-10-23 12:37:57	2025-10-23 12:39:23	28	Married	Tertiary	Student	Christianity	Urban	Yes	Health facility	Yes		Yes	Antenatal care	1	0	0	0	0	Yes	10	Partially	Health center	Yes	Partially	No	Distance to facility	0	1	0	0	0	0	0	Community awareness	Neutral	Yes	Yes	Much appreciated	589083224	5c2dea74-9ab1-402e-be10-89c7a0548ffa	2025-10-23 11:39:24			submitted_via_web		vjPvJRHBMydrYcpAtB4ohd		uuid:5c2dea74-9ab1-402e-be10-89c7a0548ffa	234
2025-10-23 12:39:23	2025-10-23 12:43:44	38	Single	Tertiary	Civil servant	Christianity	Rural	Yes	Radio/TV	Yes		Yes	Others	0	0	0	0	1	Yes	4	Not at all	Health center	Yes	Not at all	No	Lack of awareness	1	0	0	0	0	0	0	Awareness	Very satisfied	Yes	Yes	Imshia is good for people, thank you for doing it	589087698	399ccb4b-0cb5-41be-80e5-8246123e4ad4	2025-10-23 11:43:44			submitted_via_web		vjPvJRHBMydrYcpAtB4ohd		uuid:399ccb4b-0cb5-41be-80e5-8246123e4ad4	235
2025-10-23 12:43:44	2025-10-23 12:45:01	40	Single		Civil servant	Christianity	Rural	Yes	Radio/TV	No		No							Yes	5		Health center	Yes	Not at all	No	Lack of awareness	1	0	0	0	0	0	0	Awareness	Very satisfied	Yes	Yes		589088879	af92132d-4802-41ae-b94d-98e24ac4e59c	2025-10-23 11:45:02			submitted_via_web		vjPvJRHBMydrYcpAtB4ohd		uuid:af92132d-4802-41ae-b94d-98e24ac4e59c	236
2025-10-23 12:45:02	2025-10-23 12:46:15	22	Married	Tertiary		Christianity	Rural	Yes	Radio/TV	No		Yes	Postnatal care	0	0	0	1	0	Yes	3	Not at all	Health center	Yes	Partially	Yes									Awareness	Very satisfied	Yes	Yes		589089753	d81a73e5-13a1-42dd-827e-dccb8a71203d	2025-10-23 11:46:16			submitted_via_web		vjPvJRHBMydrYcpAtB4ohd		uuid:d81a73e5-13a1-42dd-827e-dccb8a71203d	237
2025-10-23 12:46:15	2025-10-23 12:47:48	20	Married	Tertiary	Civil servant	Christianity	Rural	No		No		No							Yes	4	Not at all	Health center	Yes	Not at all	Yes	Lack of awareness	1	0	0	0	0	0	0	Creating awareness	Neutral	Yes	Yes	Satisfactory	589090940	33b58c57-750c-4afd-8eb0-5d9539c910db	2025-10-23 11:47:49			submitted_via_web		vjPvJRHBMydrYcpAtB4ohd		uuid:33b58c57-750c-4afd-8eb0-5d9539c910db	238
2025-10-23 12:47:48	2025-10-23 12:50:13	28	Married	Tertiary	Student	Christianity	Rural	Yes	Friends/family	No		No							Yes	6	Not at all	Health center	Yes	Not at all	Yes	Lack of awareness	1	0	0	0	0	0	0	Creating awareness to the public	Neutral	Yes	Yes	I believe imshia is a good development but they need to Create awareness to the media and health services	589093513	af11b117-d748-4446-8106-076d96ea74f9	2025-10-23 11:50:31			submitted_via_web		vjPvJRHBMydrYcpAtB4ohd		uuid:af11b117-d748-4446-8106-076d96ea74f9	239
2025-10-23 12:50:13	2025-10-23 12:52:06	28	Married	Tertiary	Student	Christianity		Yes	Health facility	No		No							Yes	3	Not at all	Health center	Yes	Not at all	Yes	Negative attitude of health workers	0	0	0	1	0	0	0	Relate with pregnant women to know more about imshia	Neutral	Yes	Yes		589095027	fabfdf74-fd8e-4984-b812-3587252ce15e	2025-10-23 11:52:08			submitted_via_web		vjPvJRHBMydrYcpAtB4ohd		uuid:fabfdf74-fd8e-4984-b812-3587252ce15e	240
2025-10-23 12:52:06	2025-10-23 12:53:29	42	Divorced/Separated	Tertiary	Civil servant	Christianity	Rural	Yes	Health facility	No		Yes	Skilled delivery Emergency obstetric care Postnatal care	0	1	1	1	0	Yes	5	Not at all	Health center	Yes	Partially	Yes	Others	0	0	0	0	0	0	1	Public awareness	Satisfied	Yes	Yes	Incentives for health workers	589096492	8f5078e4-a227-4ead-94cb-3bb55adf1cd5	2025-10-23 11:53:30			submitted_via_web		vjPvJRHBMydrYcpAtB4ohd		uuid:8f5078e4-a227-4ead-94cb-3bb55adf1cd5	241
2025-10-23 12:53:29	2025-10-23 12:55:30	28	Married	Tertiary	Student/Trader	Christianity	Rural	Yes	Health facility	No		Yes	Antenatal care Skilled delivery Emergency obstetric care Postnatal care Others	1	1	1	1	1	Yes		Fully	Health center	Yes	Fully	Yes	Transport cost	0	0	1	0	0	0	0	Modern facilities provision	Satisfied	Yes	Yes	Awareness should be emphasized	589098478	521d4523-008d-4598-a144-e55e83dd48a3	2025-10-23 11:55:31			submitted_via_web		vjPvJRHBMydrYcpAtB4ohd		uuid:521d4523-008d-4598-a144-e55e83dd48a3	242
2025-10-23 12:55:30	2025-10-23 12:57:19	28	Married	Tertiary	Business woman	Christianity	Urban	Yes	Health facility	Yes		Yes	Antenatal care Skilled delivery Emergency obstetric care Postnatal care Others	1	1	1	1	1	Yes			Health center	Yes	Fully	Yes	Transport cost	0	0	1	0	0	0	0		Satisfied	Yes	Yes	Improve co.munity sensitization	589099863	c57a5d26-f730-40ad-9b0c-539eb27dcdd9	2025-10-23 11:57:20			submitted_via_web		vjPvJRHBMydrYcpAtB4ohd		uuid:c57a5d26-f730-40ad-9b0c-539eb27dcdd9	243
2025-10-23 12:57:19	2025-10-23 12:58:45	26	Single		Farmer	Christianity	Rural	Yes	Friends/family	Yes	Self	No							Yes	7	Partially	Health center	Yes	Partially	Yes	Distance to facility Transport cost	0	1	1	0	0	0	0	Community awareness	Satisfied	Yes	Yes		589101116	b95913c2-203b-4f0b-9379-24087f599651	2025-10-23 11:58:47			submitted_via_web		vjPvJRHBMydrYcpAtB4ohd		uuid:b95913c2-203b-4f0b-9379-24087f599651	244
2025-10-23 12:58:45	2025-10-23 13:02:16	22	Married	Secondary	Sewing	Christianity	Rural	Yes	Health facility	Yes	Government subsidy	Yes	Antenatal care Skilled delivery Emergency obstetric care Postnatal care Others	1	1	1	1	1	Yes	8	Fully	Health center	Yes	Fully	Yes	Others	0	0	0	0	0	0	1		Satisfied	Yes	Yes	More programmes	589104396	67e5b882-55c7-4418-9023-cbf26777d2a6	2025-10-23 12:02:18			submitted_via_web		vjPvJRHBMydrYcpAtB4ohd		uuid:67e5b882-55c7-4418-9023-cbf26777d2a6	245
2025-10-23 13:02:16	2025-10-23 13:03:52	28	Married	Tertiary	Fashion designer	Christianity	Rural	Yes	Health facility	Yes	Government subsidy	Yes	Antenatal care Skilled delivery Emergency obstetric care Postnatal care Others	1	1	1	1	1	Yes	15	Fully	Health center	Yes	Fully	Yes	Distance to facility Others	0	1	0	0	0	0	1	Nearby facility	Very satisfied	Yes	Yes	Building of health facilities	589105924	f98caf7c-f0b9-486f-b557-c45df829939e	2025-10-23 12:03:53			submitted_via_web		vjPvJRHBMydrYcpAtB4ohd		uuid:f98caf7c-f0b9-486f-b557-c45df829939e	246
2025-10-23 13:03:52	2025-10-23 13:05:31	25	Married	Tertiary	Trader	Christianity	Rural	Yes	Health facility	Yes	Government subsidy	Yes	Antenatal care Skilled delivery Emergency obstetric care Postnatal care Others	1	1	1	1	1	Yes	10	Fully	Health center	Yes	Fully	Yes	Transport cost	0	0	1	0	0	0	0	Provide transport cost	Very satisfied	Yes	Yes	Thank God for Imshia	589107646	2ce64370-adef-4479-afb8-2491b217c318	2025-10-23 12:05:32			submitted_via_web		vjPvJRHBMydrYcpAtB4ohd		uuid:2ce64370-adef-4479-afb8-2491b217c318	247
2025-10-23 13:05:31	2025-10-23 13:11:43	35	Married	Secondary	Trader	Christianity	Rural	Yes	Community leader	Yes	Government subsidy	Yes	Antenatal care Skilled delivery Emergency obstetric care Postnatal care Others	1	1	1	1	1	Yes	12	Fully	Health center	Yes	Fully	Yes	Transport cost	0	0	1	0	0	0	0	Provision of TP	Very satisfied	Yes	Yes		589113951	0ddc68c9-af05-4b3e-9c5f-367980e373a3	2025-10-23 12:11:45			submitted_via_web		vjPvJRHBMydrYcpAtB4ohd		uuid:0ddc68c9-af05-4b3e-9c5f-367980e373a3	248
2025-10-23 13:11:43	2025-10-23 13:13:03	36	Married	Secondary	Farmer	Christianity	Rural	Yes	Health facility	Yes	Government subsidy	Yes	Antenatal care Skilled delivery Emergency obstetric care Postnatal care Others	1	1	1	1	1	Yes	8	Fully	Health center	Yes	Fully	Yes	Transport cost	0	0	1	0	0	0	0		Very satisfied	Yes	Yes		589115493	3a02cf39-041d-4e08-bf77-2f29596092d9	2025-10-23 12:13:04			submitted_via_web		vjPvJRHBMydrYcpAtB4ohd		uuid:3a02cf39-041d-4e08-bf77-2f29596092d9	249
2025-10-23 13:13:03	2025-10-23 13:15:05	25	Married	Secondary	Trader	Christianity	Rural	Yes	Health facility	Yes	Employer	Yes	Antenatal care Skilled delivery Emergency obstetric care Postnatal care	1	1	1	1	0	Yes	6	Fully	Health center	Yes	Fully	Yes	Others	0	0	0	0	0	0	1	To make sure Imshia provides all services	Very satisfied	Yes	Yes		589117234	46ab18ea-23de-48c1-9a83-4b32e97eb000	2025-10-23 12:15:06			submitted_via_web		vjPvJRHBMydrYcpAtB4ohd		uuid:46ab18ea-23de-48c1-9a83-4b32e97eb000	250
2025-10-23 13:15:05	2025-10-23 13:16:54	30	Married	Tertiary	House wife	Christianity	Rural	Yes	Radio/TV	Yes	Government subsidy	Yes	Antenatal care Skilled delivery Emergency obstetric care Postnatal care Others	1	1	1	1	1	Yes	5	Fully	Health center	Yes	Partially	Yes	Others	0	0	0	0	0	0	1	Make sure that Imshia provides all services	Very satisfied	Yes	Yes	They are doing well	589118946	0d9cc617-3b5d-4a39-9b7d-0019e649838b	2025-10-23 12:16:55			submitted_via_web		vjPvJRHBMydrYcpAtB4ohd		uuid:0d9cc617-3b5d-4a39-9b7d-0019e649838b	251
2025-10-23 13:16:54	2025-10-23 13:18:50	35	Married	Secondary	House wife	Christianity	Rural	Yes	Health facility	Yes	Government subsidy	Yes	Antenatal care Skilled delivery Emergency obstetric care Others	1	1	1	0	1	Yes	7	Fully	Health center	Yes	Fully	Yes	Others	0	0	0	0	0	0	1		Very satisfied	Yes	Yes		589120443	034bb42d-9ef2-446f-b9bd-3751077b8844	2025-10-23 12:18:51			submitted_via_web		vjPvJRHBMydrYcpAtB4ohd		uuid:034bb42d-9ef2-446f-b9bd-3751077b8844	252
2025-10-23 13:18:50	2025-10-23 13:20:42	27	Married	Secondary	Trader	Christianity	Rural	Yes	Health facility	Yes	Government subsidy	Yes	Antenatal care Skilled delivery Emergency obstetric care Postnatal care	1	1	1	1	0	Yes	4	Fully	Health center	Yes	Fully	Yes	Others	0	0	0	0	0	0	1	To make sure Imshia provides all services	Very satisfied	Yes	Yes	They are doing well	589121908	c24787dd-5397-4d76-9513-08774f2a6eeb	2025-10-23 12:20:43			submitted_via_web		vjPvJRHBMydrYcpAtB4ohd		uuid:c24787dd-5397-4d76-9513-08774f2a6eeb	253
2025-10-23 13:20:42	2025-10-23 13:22:55	23	Married	Secondary	Farmer	Christianity	Rural	Yes	Community leader	Yes	Government subsidy	Yes	Antenatal care Skilled delivery Emergency obstetric care Postnatal care	1	1	1	1	0	Yes	8	Fully	Health center	Yes	Fully	Yes									More workers	Very satisfied	Yes	Yes	Thank you to the governor	589123798	a6196daf-a323-4fab-aadb-63b3e5e2b556	2025-10-23 12:22:56			submitted_via_web		vjPvJRHBMydrYcpAtB4ohd		uuid:a6196daf-a323-4fab-aadb-63b3e5e2b556	254
2025-10-23 13:22:55	2025-10-23 13:57:25	40	Married	Tertiary	Health worker	Christianity	Rural	Yes	Friends/family	No		Yes	Antenatal care Skilled delivery Emergency obstetric care	1	1	1	0	0	Yes	10	Not at all	Others	Yes	Not at all	Yes	Lack of awareness	1	0	0	0	0	0	0	Health awareness	Neutral	Yes	Yes	Keep going	589155867	a5e28ef2-8690-47bd-bfe2-4e3930391e14	2025-10-23 12:57:28			submitted_via_web		vjPvJRHBMydrYcpAtB4ohd		uuid:a5e28ef2-8690-47bd-bfe2-4e3930391e14	255
2025-10-23 13:57:25	2025-10-23 13:59:28	38	Married	Tertiary		Christianity	Rural	Yes	Health facility	Yes	Government subsidy	Yes	Antenatal care Skilled delivery Emergency obstetric care Postnatal care	1	1	1	1	0	Yes	4	Fully	General hospital	Yes	Fully	Yes	Lack of awareness Transport cost	1	0	1	0	0	0	0	Community mobilization	Very satisfied	Yes	Yes	No	589157679	f5bae37e-addd-41d7-b048-173f2b6723d2	2025-10-23 12:59:29			submitted_via_web		vjPvJRHBMydrYcpAtB4ohd		uuid:f5bae37e-addd-41d7-b048-173f2b6723d2	256
2025-10-23 13:59:28	2025-10-23 14:02:40	35	Married	Tertiary	Teaching	Christianity	Rural	Yes	Health facility	No		Yes	Antenatal care Skilled delivery Emergency obstetric care Postnatal care	1	1	1	1	0	Yes		Not at all	Others	Yes	Not at all	Yes	Transport cost	0	0	1	0	0	0	0		Neutral	Yes	Yes		589161096	23f6110c-6a00-4075-978d-9d2f672be9ee	2025-10-23 13:02:41			submitted_via_web		vjPvJRHBMydrYcpAtB4ohd		uuid:23f6110c-6a00-4075-978d-9d2f672be9ee	257
2025-10-23 14:02:40	2025-10-23 14:05:23	32	Married	Tertiary	Business woman	Christianity	Rural	Yes	Health facility	Yes	Government subsidy	Yes	Antenatal care Skilled delivery Emergency obstetric care Postnatal care Others	1	1	1	1	1	Yes	14	Partially	Health center	Yes	Fully	No	Transport cost	0	0	1	0	0	0	0		Satisfied	Yes	Yes		589164185	8317edc6-a1fe-4d6a-8352-a691a8167ea0	2025-10-23 13:05:24			submitted_via_web		vjPvJRHBMydrYcpAtB4ohd		uuid:8317edc6-a1fe-4d6a-8352-a691a8167ea0	258
2025-10-23 14:05:23	2025-10-23 14:07:47	29	Married	Tertiary	Teacher	Christianity	Rural	Yes	Health facility	Yes		No							No		Partially	Others	Yes	Fully	Yes	Lack of awareness	1	0	0	0	0	0	0	Adequate funding	Satisfied	Yes	Yes		589166452	4e849efd-f215-49d2-9ccd-2ce2130d4ead	2025-10-23 13:07:48			submitted_via_web		vjPvJRHBMydrYcpAtB4ohd		uuid:4e849efd-f215-49d2-9ccd-2ce2130d4ead	259
2025-10-23 14:07:47	2025-10-23 14:09:30	42	Married		Tailor	Christianity	Urban	No		No		No							Yes	14		Health center	Yes	Not at all	Yes										Satisfied	Yes	Yes		589168091	8fcc6de7-34af-4041-89dc-bfcea5fefb46	2025-10-23 13:09:31			submitted_via_web		vjPvJRHBMydrYcpAtB4ohd		uuid:8fcc6de7-34af-4041-89dc-bfcea5fefb46	260
2025-10-23 14:09:30	2025-10-23 14:11:42	26	Married		Teacher	Christianity	Rural	Yes	Health facility	Yes	Government subsidy	Yes	Antenatal care	1	0	0	0	0	Yes	12	Partially	Health center	Yes	Fully	No	Distance to facility	0	1	0	0	0	0	0		Satisfied	Yes	Yes		589170233	3eae411f-dc55-4b8d-9174-afd7ec7db898	2025-10-23 13:11:43			submitted_via_web		vjPvJRHBMydrYcpAtB4ohd		uuid:3eae411f-dc55-4b8d-9174-afd7ec7db898	261
2025-10-23 14:11:42	2025-10-23 14:13:14	23	Married		Hair stylist	Christianity	Rural	Yes	Health facility	Yes	Government subsidy	Yes	Antenatal care Skilled delivery	1	1	0	0	0	Yes		Partially	Health center	Yes	Fully	No											Yes	Yes		589171828	918b37b9-791f-4ec9-be6a-651a7cac66b2	2025-10-23 13:13:15			submitted_via_web		vjPvJRHBMydrYcpAtB4ohd		uuid:918b37b9-791f-4ec9-be6a-651a7cac66b2	262
2025-10-23 14:13:14	2025-10-23 14:14:45	22	Married			Christianity	Rural	Yes	Health facility	Yes		Yes	Skilled delivery	0	1	0	0	0	Yes		Partially	Health center	Yes	Fully	No										Satisfied	Yes	Yes		589173506	bd2ad079-e187-46b0-a6f1-e5c47c737d45	2025-10-23 13:14:47			submitted_via_web		vjPvJRHBMydrYcpAtB4ohd		uuid:bd2ad079-e187-46b0-a6f1-e5c47c737d45	263
2025-10-23 14:14:46	2025-10-23 14:15:43	30	Married	Tertiary		Christianity	Rural	No		No		No							Yes		Not at all	Health center	Yes	Not at all	No											Yes	Yes		589174666	50bbbffe-13fc-4d60-90a5-07e5a7efdbea	2025-10-23 13:15:44			submitted_via_web		vjPvJRHBMydrYcpAtB4ohd		uuid:50bbbffe-13fc-4d60-90a5-07e5a7efdbea	264
2025-10-23 14:15:43	2025-10-23 14:19:41	31	Married	Tertiary	Business woman	Christianity	Urban	Yes	Friends/family	Yes	Self	No							Yes	4	Fully	Others	Yes	Partially											Satisfied	Yes	Yes		589178000	ceeab809-4e92-4c54-9fa9-697fc8c94896	2025-10-23 13:19:42			submitted_via_web		vjPvJRHBMydrYcpAtB4ohd		uuid:ceeab809-4e92-4c54-9fa9-697fc8c94896	265
2025-10-23 14:19:42	2025-10-23 14:22:01	36	Married	Tertiary	Teacher	Christianity	Urban	Yes	Radio/TV	Yes	Spouse/family	Yes	Antenatal care Skilled delivery	1	1	0	0	0	Yes	4	Fully	General hospital	Yes	Partially										More awareness		Yes	Yes		589180251	7eb1d2ef-0a47-4196-810b-441812a376b5	2025-10-23 13:22:01			submitted_via_web		vjPvJRHBMydrYcpAtB4ohd		uuid:7eb1d2ef-0a47-4196-810b-441812a376b5	266
2025-10-23 14:22:01	2025-10-23 14:26:11	27	Married	Secondary	Trader	Christianity	Rural	Yes	Community leader	Yes	Government subsidy	Yes	Antenatal care	1	0	0	0	0	Yes	5	Fully	Health center	Yes	Fully		Distance to facility	0	1	0	0	0	0	0	Awareness	Satisfied	Yes	Yes		589184880	20421431-9f8e-4008-a1e0-d2efb2cef8d0	2025-10-23 13:26:12			submitted_via_web		vjPvJRHBMydrYcpAtB4ohd		uuid:20421431-9f8e-4008-a1e0-d2efb2cef8d0	267
2025-10-23 14:26:11	2025-10-23 21:47:43	23	Married	Tertiary	Trader	Christianity	Rural	Yes	Health facility	Yes	Government subsidy	Yes	Antenatal care Skilled delivery	1	1	0	0	0	Yes	5	Fully	Health center	Yes	Fully		Distance to facility	0	1	0	0	0	0	0		Satisfied	Yes	Yes		589533584	4d8e051e-2882-4fe4-8c20-f2f3d3cff354	2025-10-23 20:47:46			submitted_via_web		vjPvJRHBMydrYcpAtB4ohd		uuid:4d8e051e-2882-4fe4-8c20-f2f3d3cff354	268
2025-10-23 21:47:43	2025-10-23 21:49:05	30			Business	Islam	Rural	Yes	Radio/TV	Yes		Yes	Antenatal care Postnatal care	1	0	0	1	0	No			Others	Yes	Fully	Yes	Transport cost	0	0	1	0	0	0	0		Very satisfied	Yes	Yes		589534131	e6916931-870d-41c4-ab8e-01b9325bef05	2025-10-23 20:49:06			submitted_via_web		vjPvJRHBMydrYcpAtB4ohd		uuid:e6916931-870d-41c4-ab8e-01b9325bef05	269
2025-10-23 21:49:05	2025-10-23 21:50:21	58	Divorced/Separated	Tertiary	Trader	Christianity	Urban	Yes	Health facility	Yes	Government subsidy	Yes	Antenatal care Skilled delivery Emergency obstetric care Postnatal care	1	1	1	1	0	Yes	8	Fully	Health center	Yes	Fully		Transport cost	0	0	1	0	0	0	0		Very satisfied	Yes	Yes		589534646	f904d624-f95b-4f59-ae5a-d3894a136d40	2025-10-23 20:50:22			submitted_via_web		vjPvJRHBMydrYcpAtB4ohd		uuid:f904d624-f95b-4f59-ae5a-d3894a136d40	270
2025-10-23 21:50:21	2025-10-23 21:51:23	25	Married	Secondary	Business	Christianity	Urban	Yes	Friends/family	Yes	Government subsidy	Yes	Antenatal care Skilled delivery Emergency obstetric care Postnatal care	1	1	1	1	0	Yes	7	Fully	Health center	Yes	Fully	Yes	Transport cost	0	0	1	0	0	0	0		Very satisfied	Yes	Yes		589535133	ce824fbc-2d8f-45ba-ba0d-4f44caf65df4	2025-10-23 20:51:24			submitted_via_web		vjPvJRHBMydrYcpAtB4ohd		uuid:ce824fbc-2d8f-45ba-ba0d-4f44caf65df4	271
2025-10-23 21:51:23	2025-10-23 21:52:51	36	Married	Secondary	Trader	Christianity	Urban	Yes	Friends/family	Yes	Government subsidy	Yes	Antenatal care Skilled delivery Emergency obstetric care Postnatal care	1	1	1	1	0	Yes	7	Fully	Health center	Yes	Fully		Transport cost	0	0	1	0	0	0	0		Very satisfied		Yes		589535755	9250516e-d6ea-4159-a7f2-a960617ac839	2025-10-23 20:52:52			submitted_via_web		vjPvJRHBMydrYcpAtB4ohd		uuid:9250516e-d6ea-4159-a7f2-a960617ac839	272
2025-10-23 21:52:51	2025-10-23 21:54:04	43	Married	Tertiary	Business	Islam	Urban	Yes	Friends/family	Yes	Government subsidy	Yes	Antenatal care Skilled delivery Emergency obstetric care Postnatal care	1	1	1	1	0	Yes	7	Fully	Health center	Yes	Fully	Yes	Transport cost	0	0	1	0	0	0	0		Very satisfied	Yes	Yes		589536340	09d67a29-190d-4a49-acfe-89534ee1a680	2025-10-23 20:54:04			submitted_via_web		vjPvJRHBMydrYcpAtB4ohd		uuid:09d67a29-190d-4a49-acfe-89534ee1a680	273
2025-10-23 21:54:04	2025-10-23 21:55:13	27	Married	Secondary	Trader	Christianity	Urban	Yes	Health facility	Yes	Government subsidy	Yes	Antenatal care Skilled delivery Emergency obstetric care Postnatal care	1	1	1	1	0	Yes	7	Fully	Health center	Yes	Fully	Yes	Transport cost	0	0	1	0	0	0	0		Very satisfied	Yes	Yes		589536745	87517800-faa4-492e-a1d4-9dcc44c04663	2025-10-23 20:55:16			submitted_via_web		vjPvJRHBMydrYcpAtB4ohd		uuid:87517800-faa4-492e-a1d4-9dcc44c04663	274
2025-10-23 21:55:13	2025-10-23 21:56:26	30	Married	Secondary	Family	Christianity	Rural	Yes	Health facility	Yes	Government subsidy	Yes	Antenatal care Skilled delivery Emergency obstetric care Postnatal care	1	1	1	1	0	Yes	5	Fully	Health center	Yes	Fully	Yes	Distance to facility	0	1	0	0	0	0	0		Very satisfied	Yes	Yes		589537107	e0e11320-26ea-41ad-8d27-8a58e039b199	2025-10-23 20:56:26			submitted_via_web		vjPvJRHBMydrYcpAtB4ohd		uuid:e0e11320-26ea-41ad-8d27-8a58e039b199	275
2025-10-23 21:56:26	2025-10-23 21:58:17	30	Married	Secondary	Married	Christianity	Rural	Yes	Health facility	Yes	Government subsidy	Yes	Antenatal care Skilled delivery Emergency obstetric care	1	1	1	0	0	Yes	4	Fully	Health center	Yes	Fully	Yes	Distance to facility Transport cost	0	1	1	0	0	0	0		Very satisfied	Yes	Yes		589537786	30c22c43-01d9-458f-996f-c8e6913c0848	2025-10-23 20:58:18			submitted_via_web		vjPvJRHBMydrYcpAtB4ohd		uuid:30c22c43-01d9-458f-996f-c8e6913c0848	276
2025-10-23 21:58:17	2025-10-23 21:59:38	38	Married		Farming		Rural	Yes	Friends/family	Yes	Employer	Yes	Antenatal care Skilled delivery Emergency obstetric care Postnatal care	1	1	1	1	0	Yes		Fully	General hospital	Yes	Fully	Yes	Lack of awareness Distance to facility Transport cost Cultural preference for home delivery	1	1	1	0	0	1	0	Employ more health workers	Very satisfied	Yes	Yes		589538196	a8b774f3-e312-499e-81d4-1623023d0f91	2025-10-23 20:59:39			submitted_via_web		vjPvJRHBMydrYcpAtB4ohd		uuid:a8b774f3-e312-499e-81d4-1623023d0f91	277
2025-10-23 21:59:38	2025-10-23 22:01:32	26	Married	Secondary	House wife	Christianity	Rural	Yes	Health facility	Yes	Government subsidy	Yes	Antenatal care Skilled delivery Emergency obstetric care Postnatal care	1	1	1	1	0	Yes	4	Fully	Health center	Yes	Fully	Yes	Distance to facility Transport cost Cultural preference for home delivery	0	1	1	0	0	1	0	Awareness	Very satisfied	Yes	Yes		589538900	dd937c76-5275-4b89-8d15-fa141a680193	2025-10-23 21:01:33			submitted_via_web		vjPvJRHBMydrYcpAtB4ohd		uuid:dd937c76-5275-4b89-8d15-fa141a680193	278
2025-10-23 22:01:32	2025-10-23 22:04:08	28	Married	Secondary	Trader	Christianity	Rural	Yes	Health facility	Yes	Government subsidy	Yes	Antenatal care Skilled delivery Emergency obstetric care Postnatal care	1	1	1	1	0	Yes	8	Fully	Health center	Yes	Fully	Yes										Very satisfied	Yes	Yes		589540235	1a8bf747-9941-4045-bb94-08acdbc1dde5	2025-10-23 21:04:09			submitted_via_web		vjPvJRHBMydrYcpAtB4ohd		uuid:1a8bf747-9941-4045-bb94-08acdbc1dde5	279
2025-10-23 22:04:08	2025-10-23 22:05:37	27	Married	Secondary	Trading	Christianity	Rural	Yes	Community leader	Yes	Government subsidy	Yes	Antenatal care Skilled delivery Emergency obstetric care Postnatal care	1	1	1	1	0	Yes	5	Fully	Health center	Yes	Fully	Yes									Increase more money for service	Very satisfied	Yes	Yes		589540947	2e8e0561-43f3-4169-a130-5d1de40b02af	2025-10-23 21:05:38			submitted_via_web		vjPvJRHBMydrYcpAtB4ohd		uuid:2e8e0561-43f3-4169-a130-5d1de40b02af	280
2025-10-23 22:05:38	2025-10-23 22:06:57	30	Married	Secondary	Farming	Christianity	Rural	Yes	Health facility	Yes	Government subsidy	Yes	Antenatal care Skilled delivery Postnatal care	1	1	0	1	0	Yes	4	Fully	Health center	Yes	Fully	Yes									More nurses	Satisfied	Yes	Yes		589541643	8056e600-d1ee-4aa2-83e5-aef29da7678b	2025-10-23 21:06:59			submitted_via_web		vjPvJRHBMydrYcpAtB4ohd		uuid:8056e600-d1ee-4aa2-83e5-aef29da7678b	281
2025-10-23 22:06:57	2025-10-23 22:07:52	29	Married	Secondary	Trading	Christianity	Rural	Yes	Health facility	Yes	Government subsidy	Yes	Antenatal care	1	0	0	0	0	Yes		Fully	Health center	Yes	Fully	Yes										Very satisfied	Yes	Yes		589542071	c87f6c8d-e189-4e09-9238-6ddd519ba58f	2025-10-23 21:07:53			submitted_via_web		vjPvJRHBMydrYcpAtB4ohd		uuid:c87f6c8d-e189-4e09-9238-6ddd519ba58f	282
2025-10-23 22:07:52	2025-10-23 22:10:37	30	Married	Secondary	Business	Christianity	Rural	Yes	Health facility	Yes	Government subsidy	Yes	Antenatal care Skilled delivery Emergency obstetric care Postnatal care	1	1	1	1	0	Yes	3	Fully	Health center	Yes	Fully	Yes										Very satisfied	Yes	Yes		589543209	5ba58b51-44ff-41c3-a90c-03e91c6fe39f	2025-10-23 21:10:38			submitted_via_web		vjPvJRHBMydrYcpAtB4ohd		uuid:5ba58b51-44ff-41c3-a90c-03e91c6fe39f	283
2025-10-23 22:10:37	2025-10-23 22:12:15	37	Married	Secondary	Caterer	Christianity	Rural	Yes	Health facility	Yes	Government subsidy	Yes	Antenatal care Skilled delivery	1	1	0	0	0	Yes	6	Fully	Others	Yes	Fully	Yes										Very dissatisfied	Yes			589544208	095ae890-bc9b-4071-835b-f625dd4bdb2d	2025-10-23 21:12:16			submitted_via_web		vjPvJRHBMydrYcpAtB4ohd		uuid:095ae890-bc9b-4071-835b-f625dd4bdb2d	284
2025-10-23 22:12:15	2025-10-23 22:13:22	32	Single	Tertiary	Nurse	Christianity	Rural	Yes	Health facility	Yes	Government subsidy	Yes	Antenatal care Skilled delivery Emergency obstetric care	1	1	1	0	0	Yes	7	Fully	Others	Yes	Fully	Yes										Very dissatisfied	Yes	Yes		589544692	c2a75b5c-23d7-4f78-85e1-90bef3cd9bb6	2025-10-23 21:13:23			submitted_via_web		vjPvJRHBMydrYcpAtB4ohd		uuid:c2a75b5c-23d7-4f78-85e1-90bef3cd9bb6	285
2025-10-23 22:13:23	2025-10-23 22:14:27	33	Married	Secondary	House wife		Rural	Yes	Health facility	Yes		Yes	Antenatal care Skilled delivery Emergency obstetric care	1	1	1	0	0	Yes	8	Fully	Others	Yes	Fully	Yes										Very dissatisfied	Yes	Yes		589545070	3626f57a-df2e-4b4f-a2b3-18e19af14d91	2025-10-23 21:14:28			submitted_via_web		vjPvJRHBMydrYcpAtB4ohd		uuid:3626f57a-df2e-4b4f-a2b3-18e19af14d91	286
2025-10-23 22:14:27	2025-10-23 22:15:56	31	Married	Tertiary	Trader	Christianity	Rural	Yes	Health facility	Yes	Government subsidy	Yes	Antenatal care Skilled delivery Emergency obstetric care Others	1	1	1	0	1	Yes	8	Fully	Others	Yes	Fully	Yes	Lack of awareness Distance to facility Negative attitude of health workers	1	1	0	1	0	0	0	More facilities should be included	Very satisfied	Yes	Yes	More facilities	589545477	0b057f55-2f36-4a4f-aa4d-0fd21e20d1f6	2025-10-23 21:15:57			submitted_via_web		vjPvJRHBMydrYcpAtB4ohd		uuid:0b057f55-2f36-4a4f-aa4d-0fd21e20d1f6	287
2025-10-23 22:15:56	2025-10-23 22:17:36	29	Married	Secondary	Trading	Christianity	Rural	Yes	Community leader	Yes	Government subsidy	Yes	Antenatal care Skilled delivery Emergency obstetric care Postnatal care	1	1	1	1	0	Yes	6	Fully	Health center	Yes	Fully	Yes									More facilities	Satisfied	Yes	Yes		589546117	46fba571-337a-45d2-adfb-b5835c7bf091	2025-10-23 21:17:37			submitted_via_web		vjPvJRHBMydrYcpAtB4ohd		uuid:46fba571-337a-45d2-adfb-b5835c7bf091	288
2025-10-23 22:17:36	2025-10-23 22:19:41	25	Married		House wife	Christianity	Rural	No		No		Yes	Skilled delivery	0	1	0	0	0	Yes	4	Not at all	Others	Yes	Not at all	Yes											Yes	Yes	Make it continuous	589546593	33a0de83-02bf-4007-ab7c-45ad57a8ca01	2025-10-23 21:19:42			submitted_via_web		vjPvJRHBMydrYcpAtB4ohd		uuid:33a0de83-02bf-4007-ab7c-45ad57a8ca01	289
2025-10-23 22:19:41	2025-10-23 22:22:01	49	Married	Tertiary	Teaching	Christianity	Rural	Yes	Friends/family	No		Yes	Skilled delivery	0	1	0	0	0	Yes	4	Not at all	Others	Yes	Not at all	Yes											Yes	Yes	Women are happy, don't stop make it continuous	589547374	5b48d974-8d3d-470c-9329-033d22f1e3e4	2025-10-23 21:22:02			submitted_via_web		vjPvJRHBMydrYcpAtB4ohd		uuid:5b48d974-8d3d-470c-9329-033d22f1e3e4	290
2025-10-23 22:22:01	2025-10-23 22:23:46	28	Married	Tertiary	Civil servant	Christianity	Rural	Yes	Health facility	Yes	Government subsidy	Yes	Antenatal care Skilled delivery Emergency obstetric care Postnatal care Others	1	1	1	1	1	Yes	6	Fully	Health center	Yes	Fully	Yes	Lack of awareness Distance to facility Transport cost	1	1	1	0	0	0	0	Money for transport	Very satisfied	Yes	Yes	Keep the good work	589548181	0777e4ee-8861-41e4-bb42-efff1c983738	2025-10-23 21:23:47			submitted_via_web		vjPvJRHBMydrYcpAtB4ohd		uuid:0777e4ee-8861-41e4-bb42-efff1c983738	291
2025-10-23 22:23:46	2025-10-23 22:24:56	25	Divorced/Separated	Secondary	Teaching	Christianity	Rural	Yes	Health facility	No		Yes	Skilled delivery	0	1	0	0	0	Yes	5	Not at all	Health center	Yes	Not at all	Yes											Yes	Yes		589548737	b5247be4-4257-4c7b-a996-7365992b8433	2025-10-23 21:24:57			submitted_via_web		vjPvJRHBMydrYcpAtB4ohd		uuid:b5247be4-4257-4c7b-a996-7365992b8433	292
2025-10-23 22:24:56	2025-10-23 22:26:37	23	Married	Tertiary	Teaching	Christianity	Rural	Yes	Health facility	Yes	Government subsidy	Yes	Antenatal care Skilled delivery Emergency obstetric care Postnatal care	1	1	1	1	0	Yes	5	Fully	Others		Fully	Yes	Lack of awareness Distance to facility Transport cost	1	1	1	0	0	0	0	More awareness and employment of more workers	Very satisfied	Yes	Yes		589549466	5995a7ff-59f5-4c8b-9590-46409cad7073	2025-10-23 21:26:47			submitted_via_web		vjPvJRHBMydrYcpAtB4ohd		uuid:5995a7ff-59f5-4c8b-9590-46409cad7073	293
2025-10-23 22:26:37	2025-10-23 22:28:12	28	Married	Tertiary	Business	Christianity	Rural	Yes	Friends/family	Yes		Yes	Antenatal care Skilled delivery Emergency obstetric care Postnatal care	1	1	1	1	0	Yes	4	Fully	Health center	Yes	Fully	Yes	Distance to facility	0	1	0	0	0	0	0	Transportation	Very satisfied	Yes	Yes	Well done	589550126	d5730543-62f6-44ac-ad60-e663fd946d52	2025-10-23 21:28:13			submitted_via_web		vjPvJRHBMydrYcpAtB4ohd		uuid:d5730543-62f6-44ac-ad60-e663fd946d52	294
2025-10-23 22:43:16	2025-10-23 22:45:46	32	Divorced/Separated	Tertiary	Business woman	Christianity	Urban	Yes	Health facility	Yes	Self	Yes	Antenatal care Skilled delivery Emergency obstetric care Postnatal care Others	1	1	1	1	1	Yes	10	Fully	Health center	Yes	Fully	Yes	Others	0	0	0	0	0	0	1	Awareness	Satisfied	Yes	Yes	I'm satisfied with the services rendered	589557897	2fae5a4f-8276-463b-9b50-05ca9aa5538f	2025-10-23 21:45:49			submitted_via_web		vjPvJRHBMydrYcpAtB4ohd		uuid:2fae5a4f-8276-463b-9b50-05ca9aa5538f	295
2025-10-23 22:28:12	2025-10-23 22:48:20	31	Widowed	Secondary	Trader	Christianity	Rural	No		No		No							Yes	12	Not at all	Health center	Yes	Not at all	Yes	Transport cost	0	0	1	0	0	0	0	Community awareness	Neutral	No	No		589558915	14c759e5-fc42-4999-97b2-e0d599437f18	2025-10-23 21:48:20			submitted_via_web		vjPvJRHBMydrYcpAtB4ohd		uuid:14c759e5-fc42-4999-97b2-e0d599437f18	296
2025-10-23 22:45:46	2025-10-23 22:51:40	25	Married		Trading	Christianity	Rural	Yes	Health facility	Yes		Yes	Antenatal care Skilled delivery Emergency obstetric care Postnatal care Others	1	1	1	1	1	Yes	6	Fully	Health center	Yes	Fully	Yes	Distance to facility	0	1	0	0	0	0	0	Employ more skilled attendants	Very satisfied		Yes	I'm grateful to the initiator and funders	589560008	f6d78d86-eafd-4688-b86d-87a9bf62f6e0	2025-10-23 21:51:41			submitted_via_web		vjPvJRHBMydrYcpAtB4ohd		uuid:f6d78d86-eafd-4688-b86d-87a9bf62f6e0	297
2025-10-23 22:55:41	2025-10-23 22:58:32	28	Married	Tertiary	Hair dresser	Christianity	Rural	Yes	Health facility	Yes	Government subsidy	Yes	Antenatal care Skilled delivery Others	1	1	0	0	1	Yes	5	Fully	Health center	Yes	Fully	Yes	Distance to facility	0	1	0	0	0	0	0	Employment of more qualified health worker	Satisfied	Yes	Yes		589562240	b24e92b6-827b-4e2b-964e-d41f49ea49ab	2025-10-23 21:58:34			submitted_via_web		vjPvJRHBMydrYcpAtB4ohd		uuid:b24e92b6-827b-4e2b-964e-d41f49ea49ab	298
2025-10-23 22:58:32	2025-10-23 23:00:50	29	Married	Secondary	Tailor	Christianity	Rural	Yes	Health facility	Yes	Government subsidy	Yes	Antenatal care Skilled delivery Emergency obstetric care Postnatal care Others	1	1	1	1	1	Yes	6	Fully	Health center	Yes	Fully	Yes	Others	0	0	0	0	0	0	1	Create awareness	Very satisfied	Yes	Yes	God's strength to continue	589563001	f17bca0c-1d81-4435-b51a-58605b655f43	2025-10-23 22:00:53			submitted_via_web		vjPvJRHBMydrYcpAtB4ohd		uuid:f17bca0c-1d81-4435-b51a-58605b655f43	299
2025-10-23 23:00:51	2025-10-23 23:02:37	37	Married	Tertiary	Baker	Christianity	Urban	Yes	Health facility	Yes	Self	Yes	Antenatal care Skilled delivery Emergency obstetric care Postnatal care Others	1	1	1	1	1	Yes	9	Fully	Health center	Yes	Fully	Yes	Lack of awareness	1	0	0	0	0	0	0	Public awareness	Very satisfied	Yes	Yes	Imshia continue with your good work to assist others	589563577	9a202777-f508-4020-884a-e334a0c0c114	2025-10-23 22:02:39			submitted_via_web		vjPvJRHBMydrYcpAtB4ohd		uuid:9a202777-f508-4020-884a-e334a0c0c114	300
2025-10-23 23:02:37	2025-10-23 23:04:04	23	Married	Secondary	Farming and trading	Christianity	Rural	Yes	Health facility	Yes		Yes	Antenatal care Skilled delivery Emergency obstetric care Postnatal care Others	1	1	1	1	1	Yes	10	Fully	Health center	Yes	Fully	Yes									Awareness	Very satisfied	Yes	Yes	I'm happy to be enrolled	589564007	c41c1ecd-b158-41c8-84e6-7236c1fc3616	2025-10-23 22:04:06			submitted_via_web		vjPvJRHBMydrYcpAtB4ohd		uuid:c41c1ecd-b158-41c8-84e6-7236c1fc3616	301
2025-10-23 23:04:04	2025-10-23 23:06:48	25	Married	Tertiary	Business woman	Christianity	Urban	No		Yes	Government subsidy	Yes	Skilled delivery	0	1	0	0	0	Yes	2	Fully	Health center	Yes	Not at all	No	Transport cost	0	0	1	0	0	0	0	Community awareness	Very satisfied	Yes	Yes	Imshia has really helped in all areas both immunization, antenatal and delivery care	589564941	59a7c729-1def-4709-9c00-3a41088db9b3	2025-10-23 22:06:50			submitted_via_web		vjPvJRHBMydrYcpAtB4ohd		uuid:59a7c729-1def-4709-9c00-3a41088db9b3	302
2025-10-23 23:06:48	2025-10-23 23:08:46	34	Single	Secondary	Hair dresser	Christianity	Rural	Yes	Friends/family	Yes	Government subsidy	Yes	Antenatal care	1	0	0	0	0	Yes	4	Fully	Home	No	Fully	Yes	Others	0	0	0	0	0	0	1	Educating women on what Imshia is all about	Satisfied	Yes	Yes	Imshia has helped in reduction of drug cost	589565522	c88ca41c-216e-4269-bcec-92a91b10dfa4	2025-10-23 22:08:48			submitted_via_web		vjPvJRHBMydrYcpAtB4ohd		uuid:c88ca41c-216e-4269-bcec-92a91b10dfa4	303
2025-10-23 23:08:46	2025-10-23 23:11:47	29	Married	Tertiary	Make up artist	Christianity	Rural	Yes	Health facility	Yes	Spouse/family	Yes	Antenatal care Skilled delivery Emergency obstetric care Postnatal care Others	1	1	1	1	1	Yes	6	Fully	Health center	Yes	Fully	Yes	Others	0	0	0	0	0	0	1	Awareness	Satisfied	Yes	Yes	I'm grateful for the assistance you have given to pregnant women	589566338	4d33325b-1d68-402a-ad78-c00ed9ccb71d	2025-10-23 22:11:50			submitted_via_web		vjPvJRHBMydrYcpAtB4ohd		uuid:4d33325b-1d68-402a-ad78-c00ed9ccb71d	304
2025-10-23 23:11:47	2025-10-23 23:14:26	20	Single	Secondary	Student	Christianity	Rural	Yes	Health facility	Yes	Government subsidy	No							Yes	27	Fully	Health center	Yes	Fully	Yes	Transport cost	0	0	1	0	0	0	0	Enrollment of more women and children	Very satisfied	Yes	Yes		589567355	e8d0a830-bf5c-4a3f-a833-07c44786e68d	2025-10-23 22:14:27			submitted_via_web		vjPvJRHBMydrYcpAtB4ohd		uuid:e8d0a830-bf5c-4a3f-a833-07c44786e68d	305
2025-10-23 23:14:26	2025-10-23 23:16:13	28	Married	Secondary	Trader	Christianity	Rural	Yes	Health facility	Yes	Government subsidy	Yes	Antenatal care Skilled delivery Emergency obstetric care Postnatal care	1	1	1	1	0	Yes	36	Fully	Health center	Yes	Fully	Yes	Distance to facility Transport cost	0	1	1	0	0	0	0	Need more workers PHC's	Very satisfied	Yes	Yes	I appreciate the opportunity	589567905	f2368b53-2e7b-411d-b833-f3d389a84cb3	2025-10-23 22:16:15			submitted_via_web		vjPvJRHBMydrYcpAtB4ohd		uuid:f2368b53-2e7b-411d-b833-f3d389a84cb3	306
2025-10-23 23:16:13	2025-10-23 23:17:37	32	Married		Student	Islam	Urban	Yes	Health facility	Yes		Yes	Antenatal care Skilled delivery Emergency obstetric care Postnatal care	1	1	1	1	0	Yes	10	Fully	Health center	Yes	Fully	Yes	Transport cost	0	0	1	0	0	0	0	Sensitization	Satisfied	Yes	Yes	I'm happy anytime I think about Imshia	589568388	7ab1bf5d-4767-41fb-8dc6-1a8b3f53cabd	2025-10-23 22:17:39			submitted_via_web		vjPvJRHBMydrYcpAtB4ohd		uuid:7ab1bf5d-4767-41fb-8dc6-1a8b3f53cabd	307
2025-10-23 23:17:37	2025-10-23 23:19:15	39	Married	Tertiary	Business woman	Christianity	Urban	Yes	Friends/family	Yes	Government subsidy	Yes	Antenatal care Skilled delivery Emergency obstetric care	1	1	1	0	0	Yes	6	Fully	Health center	Yes	Fully	Yes	Distance to facility	0	1	0	0	0	0	0	Sensitization	Satisfied	Yes	Yes	Imshia is the best thing that has happened in my life	589569005	86667e2c-e33a-413a-a3eb-8172cbe56c94	2025-10-23 22:19:16			submitted_via_web		vjPvJRHBMydrYcpAtB4ohd		uuid:86667e2c-e33a-413a-a3eb-8172cbe56c94	308
2025-10-23 23:19:15	2025-10-23 23:22:33	19	Married	Secondary	Trader	Islam	Rural	Yes	Health facility	Yes	Government subsidy	Yes	Antenatal care Skilled delivery Emergency obstetric care Postnatal care	1	1	1	1	0	Yes	5	Fully	Health center	Yes	Fully	Yes	Transport cost	0	0	1	0	0	0	0	Sensitization	Very satisfied	Yes	Yes	IMSHIA to the world	589569979	115b2f6f-0f87-4461-b7fd-d3cae7ec8e27	2025-10-23 22:22:36			submitted_via_web		vjPvJRHBMydrYcpAtB4ohd		uuid:115b2f6f-0f87-4461-b7fd-d3cae7ec8e27	309
2025-10-23 23:22:33	2025-10-23 23:25:08	41	Married	Tertiary	Trader	Islam	Urban	Yes	Health facility	Yes		Yes	Antenatal care Skilled delivery Emergency obstetric care Postnatal care	1	1	1	1	0	Yes	8	Fully	Health center	Yes	Fully	Yes	Distance to facility	0	1	0	0	0	0	0	Sensitization	Very satisfied	Yes	Yes	Best program In the whole world	589570571	776e176a-a6a5-4cf4-95f7-df24a965eabf	2025-10-23 22:25:11			submitted_via_web		vjPvJRHBMydrYcpAtB4ohd		uuid:776e176a-a6a5-4cf4-95f7-df24a965eabf	310
2025-10-23 23:25:09	2025-10-23 23:27:08	32	Married	Tertiary	Business	Christianity	Rural	Yes	Health facility	Yes	Government subsidy	Yes	Antenatal care Skilled delivery Emergency obstetric care Postnatal care	1	1	1	1	0	Yes	40	Fully	Others	Yes	Fully	Yes	Lack of awareness Distance to facility Transport cost	1	1	1	0	0	0	0	Increase awareness	Very satisfied	Yes	Yes	I appreciate	589571008	e747ff4e-1303-4bfd-9874-909898831b9b	2025-10-23 22:27:10			submitted_via_web		vjPvJRHBMydrYcpAtB4ohd		uuid:e747ff4e-1303-4bfd-9874-909898831b9b	311
2025-10-23 23:27:08	2025-10-23 23:29:03	32	Married	Secondary	Farmer	Christianity	Rural	Yes	Community leader	Yes	Government subsidy	Yes	Antenatal care Skilled delivery Emergency obstetric care	1	1	1	0	0	Yes	8	Fully	Health center	Yes	Fully	Yes	Distance to facility	0	1	0	0	0	0	0	Need of more health care	Very satisfied	Yes	Yes		589571507	d609674d-7a68-4d12-9232-97903109e613	2025-10-23 22:29:05			submitted_via_web		vjPvJRHBMydrYcpAtB4ohd		uuid:d609674d-7a68-4d12-9232-97903109e613	312
2025-10-23 23:29:03	2025-10-23 23:30:37	27	Married	Secondary	Trader	Christianity	Rural	Yes	Friends/family	Yes	Government subsidy	Yes	Antenatal care	1	0	0	0	0	Yes	6	Fully	Health center	Yes	Fully	Yes	Distance to facility Transport cost Stock out of medicine	0	1	1	0	1	0	0	Cultural preference	Very satisfied	Yes	Yes	Create more awareness	589571991	dcecac09-0d0c-4870-9d8c-238a063b04d3	2025-10-23 22:30:39			submitted_via_web		vjPvJRHBMydrYcpAtB4ohd		uuid:dcecac09-0d0c-4870-9d8c-238a063b04d3	313
2025-10-23 23:30:37	2025-10-23 23:32:42	30	Married	Secondary	House wife	Christianity	Rural	Yes	Health facility	Yes		Yes	Antenatal care Skilled delivery Emergency obstetric care Postnatal care	1	1	1	1	0	Yes	10	Fully	Health center	Yes	Fully	Yes	Transport cost	0	0	1	0	0	0	0	Sensitization	Satisfied	Yes	Yes	I'm so happy my name came out in free health insurance	589572512	69c09b31-0dba-4fc7-a4c4-15ea7666f302	2025-10-23 22:32:45			submitted_via_web		vjPvJRHBMydrYcpAtB4ohd		uuid:69c09b31-0dba-4fc7-a4c4-15ea7666f302	314
2025-10-23 23:32:42	2025-10-23 23:35:55	29	Married	Secondary	Trader	Christianity	Rural	Yes	Radio/TV	Yes	Government subsidy	Yes	Antenatal care Skilled delivery Emergency obstetric care Postnatal care	1	1	1	1	0	Yes	4	Fully	Health center	Yes	Fully	No	Distance to facility Transport cost	0	1	1	0	0	0	0	Awareness	Very satisfied	Yes	Yes		589573672	cc3f7567-608e-4487-bbdd-b2425bd4d4ec	2025-10-23 22:35:56			submitted_via_web		vjPvJRHBMydrYcpAtB4ohd		uuid:cc3f7567-608e-4487-bbdd-b2425bd4d4ec	315
2025-10-23 23:35:55	2025-10-23 23:37:21	24	Married	Secondary	House wife	Christianity	Rural	Yes	Health facility	Yes	Government subsidy	Yes	Antenatal care Skilled delivery Emergency obstetric care Postnatal care	1	1	1	1	0	Yes	2	Fully	Health center	Yes	Fully	Yes	Distance to facility	0	1	0	0	0	0	0		Very satisfied	Yes	Yes		589574072	2314fccd-7c6d-46aa-b825-952089037159	2025-10-23 22:37:23			submitted_via_web		vjPvJRHBMydrYcpAtB4ohd		uuid:2314fccd-7c6d-46aa-b825-952089037159	316
2025-10-23 23:37:21	2025-10-23 23:38:33	30	Married	Primary	House wife	Christianity	Rural	Yes	Health facility	Yes	Government subsidy	Yes	Antenatal care Skilled delivery Emergency obstetric care Postnatal care	1	1	1	1	0	Yes	3	Fully	Health center	Yes	Fully	Yes									Awareness	Very satisfied	Yes	Yes		589574611	67a937cc-ffaa-4d3a-9ba2-9e1046907fb5	2025-10-23 22:38:35			submitted_via_web		vjPvJRHBMydrYcpAtB4ohd		uuid:67a937cc-ffaa-4d3a-9ba2-9e1046907fb5	317
2025-10-23 23:38:34	2025-10-23 23:40:19	28	Widowed	Primary	House wife	Christianity	Rural	Yes	Health facility	Yes	Government subsidy	Yes	Antenatal care Skilled delivery Emergency obstetric care Postnatal care	1	1	1	1	0	Yes	3	Fully	Health center	Yes	Fully	No	Distance to facility	0	1	0	0	0	0	0	Home visit	Satisfied	Yes	Yes		589575125	578f0e06-02fa-4385-9a56-162b47f358b0	2025-10-23 22:40:21			submitted_via_web		vjPvJRHBMydrYcpAtB4ohd		uuid:578f0e06-02fa-4385-9a56-162b47f358b0	318
2025-10-23 23:40:19	2025-10-23 23:42:12	31	Married	Secondary	Teacher	Christianity	Rural	Yes	Health facility	No									Yes	4	Fully	Health center	Yes	Fully	Yes	Transport cost	0	0	1	0	0	0	0		Very satisfied	Yes	Yes		589575458	282e1fc0-09d2-44b0-b55b-76a7602a271f	2025-10-23 22:42:16			submitted_via_web		vjPvJRHBMydrYcpAtB4ohd		uuid:282e1fc0-09d2-44b0-b55b-76a7602a271f	319
2025-10-23 23:42:13	2025-10-23 23:43:43	28	Married	Tertiary	Designer	Christianity	Rural	Yes	Health facility	Yes	Government subsidy	Yes	Antenatal care Skilled delivery Emergency obstetric care	1	1	1	0	0	Yes	3	Fully	Health center	Yes	Fully	Yes	Transport cost	0	0	1	0	0	0	0		Very satisfied	Yes	Yes		589575716	8fd4af40-cfdd-46b4-82a8-6364d6053882	2025-10-23 22:43:45			submitted_via_web		vjPvJRHBMydrYcpAtB4ohd		uuid:8fd4af40-cfdd-46b4-82a8-6364d6053882	320
2025-10-23 23:43:43	2025-10-23 23:45:00	32	Widowed	Secondary	Teacher	Christianity	Rural	Yes	Radio/TV			Yes	Antenatal care Skilled delivery Emergency obstetric care Postnatal care	1	1	1	1	0	Yes	4	Fully	Health center	Yes	Fully	Yes	Distance to facility	0	1	0	0	0	0	0		Very satisfied	Yes	Yes		589575910	c2a72c2e-6419-4c6d-b976-732387bfa840	2025-10-23 22:45:02			submitted_via_web		vjPvJRHBMydrYcpAtB4ohd		uuid:c2a72c2e-6419-4c6d-b976-732387bfa840	321
2025-10-23 23:45:00	2025-10-23 23:47:10	28	Married	Secondary	Trader	Christianity	Rural	Yes	Health facility	Yes	Government subsidy	Yes	Antenatal care Skilled delivery Emergency obstetric care Postnatal care	1	1	1	1	0	Yes	4	Fully	Health center	Yes	Fully	Yes	Lack of awareness Distance to facility Transport cost	1	1	1	0	0	0	0		Very satisfied	Yes	Yes		589576407	0011decc-8525-4308-a534-ce013057a711	2025-10-23 22:47:12			submitted_via_web		vjPvJRHBMydrYcpAtB4ohd		uuid:0011decc-8525-4308-a534-ce013057a711	322
2025-10-23 23:47:10	2025-10-23 23:48:24	31	Married	Secondary	Trader	Christianity	Rural	Yes	Health facility	Yes	Government subsidy	Yes	Antenatal care Skilled delivery Emergency obstetric care Others	1	1	1	0	1	Yes	7	Fully	Health center	Yes	Fully	Yes	Distance to facility Transport cost	0	1	1	0	0	0	0		Very satisfied	Yes	Yes		589576784	c5556de5-d748-4a99-af08-7bc6ef8c39db	2025-10-23 22:48:26			submitted_via_web		vjPvJRHBMydrYcpAtB4ohd		uuid:c5556de5-d748-4a99-af08-7bc6ef8c39db	323
2025-10-23 23:48:24	2025-10-23 23:49:53	35	Married	Secondary		Christianity	Urban	Yes	Radio/TV	Yes	Self	Yes	Antenatal care Skilled delivery Emergency obstetric care	1	1	1	0	0	Yes	6	Fully	Health center	Yes	Fully	Yes									Please increase more awareness	Very satisfied	Yes	Yes	Keep it up	589577229	a252b5c0-2327-4463-abd6-0184bab1aa5c	2025-10-23 22:49:56			submitted_via_web		vjPvJRHBMydrYcpAtB4ohd		uuid:a252b5c0-2327-4463-abd6-0184bab1aa5c	324
2025-10-23 23:49:54	2025-10-23 23:54:04	25	Married	Secondary	Business woman	Christianity	Rural	Yes	Health facility	Yes	Government subsidy	Yes	Antenatal care	1	0	0	0	0	Yes	19	Fully	Health center	Yes	Fully	Yes	Transport cost Negative attitude of health workers	0	0	1	1	0	0	0		Satisfied	Yes	Yes	No	589578173	8d4fc292-c361-47e3-99db-e9a718cf8c16	2025-10-23 22:54:08			submitted_via_web		vjPvJRHBMydrYcpAtB4ohd		uuid:8d4fc292-c361-47e3-99db-e9a718cf8c16	325
2025-10-23 23:54:04	2025-10-23 23:55:18	31	Married	Secondary	Trader	Christianity	Rural	Yes	Health facility	Yes	Government subsidy	Yes	Antenatal care	1	0	0	0	0	Yes	10	Fully	Health center	Yes	Fully	Yes	Lack of awareness Distance to facility	1	1	0	0	0	0	0		Satisfied	Yes	Yes		589578468	424c6ffc-c8a9-4212-8692-3b515a8d748c	2025-10-23 22:55:21			submitted_via_web		vjPvJRHBMydrYcpAtB4ohd		uuid:424c6ffc-c8a9-4212-8692-3b515a8d748c	326
2025-10-23 23:55:19	2025-10-23 23:56:40	40	Married	Secondary	Business woman	Christianity	Rural	Yes	Health facility	Yes		Yes	Antenatal care	1	0	0	0	0	Yes	19	Fully	Health center	Yes	Fully	Yes	Lack of awareness Distance to facility	1	1	0	0	0	0	0			Yes	Yes		589578641	6f3fc166-52b8-4d4a-a24e-8545d65be749	2025-10-23 22:56:41			submitted_via_web		vjPvJRHBMydrYcpAtB4ohd		uuid:6f3fc166-52b8-4d4a-a24e-8545d65be749	327
2025-10-23 23:56:40	2025-10-23 23:57:56	41	Married	Secondary	Farmers	Christianity	Rural	Yes	Health facility	Yes	Government subsidy	Yes	Antenatal care	1	0	0	0	0	Yes		Fully	Health center	Yes	Fully	Yes	Distance to facility Transport cost	0	1	1	0	0	0	0		Satisfied	Yes	Yes		589578868	faadc504-4397-47db-b332-af3aef8a7af2	2025-10-23 22:57:58			submitted_via_web		vjPvJRHBMydrYcpAtB4ohd		uuid:faadc504-4397-47db-b332-af3aef8a7af2	328
2025-10-23 23:57:57	2025-10-23 23:59:25	29	Married	Secondary	Business woman	Christianity	Rural	Yes	Health facility	Yes	Government subsidy	Yes	Antenatal care	1	0	0	0	0	Yes	14	Fully	Health center	Yes	Fully	Yes	Distance to facility Transport cost	0	1	1	0	0	0	0		Satisfied	Yes	Yes		589579146	5b405b0d-d92e-46bd-b149-d804b2ea4695	2025-10-23 22:59:27			submitted_via_web		vjPvJRHBMydrYcpAtB4ohd		uuid:5b405b0d-d92e-46bd-b149-d804b2ea4695	329
2025-10-23 23:59:25	2025-10-24 00:00:46	38	Married	Secondary	Teacher	Christianity	Rural	Yes	Health facility	Yes	Government subsidy	Yes	Antenatal care	1	0	0	0	0	Yes	20	Fully	Health center	Yes	Fully	Yes	Distance to facility Transport cost	0	1	1	0	0	0	0		Satisfied	Yes	No		589579333	fdc0c429-4e2b-45bc-8cd7-729f2d8b3e5a	2025-10-23 23:00:48			submitted_via_web		vjPvJRHBMydrYcpAtB4ohd		uuid:fdc0c429-4e2b-45bc-8cd7-729f2d8b3e5a	330
2025-10-24 00:00:46	2025-10-24 00:01:53	24	Married	Secondary	Tailor	Christianity	Rural	Yes	Health facility	Yes	Government subsidy	Yes							Yes	18	Fully	Health center	Yes	Fully	Yes	Transport cost Negative attitude of health workers	0	0	1	1	0	0	0		Satisfied	Yes	Yes		589579569	2daffbb0-38a4-4bf1-bfa5-932654a02fe7	2025-10-23 23:01:57			submitted_via_web		vjPvJRHBMydrYcpAtB4ohd		uuid:2daffbb0-38a4-4bf1-bfa5-932654a02fe7	331
2025-10-24 00:01:53	2025-10-24 00:03:33	24	Married	Secondary	Student	Christianity	Rural	Yes	Health facility	Yes	Government subsidy	Yes	Antenatal care Skilled delivery Emergency obstetric care Postnatal care	1	1	1	1	0	Yes	6	Fully	Health center	Yes	Fully	Yes	Distance to facility Transport cost	0	1	1	0	0	0	0		Very satisfied	Yes	Yes	No	589579853	3945b0d7-33f9-4ccd-8a23-bd117d2c6626	2025-10-23 23:03:34			submitted_via_web		vjPvJRHBMydrYcpAtB4ohd		uuid:3945b0d7-33f9-4ccd-8a23-bd117d2c6626	332
2025-10-24 00:03:33	2025-10-24 00:05:50	28	Married	Secondary	Business woman	Christianity	Rural	Yes	Health facility	Yes	Government subsidy	Yes							Yes	1		General hospital	No		Yes										Satisfied	Yes	Yes		589580487	cc746382-740c-4737-9201-61c02d0473d9	2025-10-23 23:05:52			submitted_via_web		vjPvJRHBMydrYcpAtB4ohd		uuid:cc746382-740c-4737-9201-61c02d0473d9	333
2025-10-24 00:05:50	2025-10-24 00:08:13	38	Divorced/Separated	Secondary	Business	Christianity	Rural	Yes	Friends/family	Yes	Self	Yes							Yes	6	Fully	Health center	Yes	Fully	Yes	Distance to facility Transport cost	0	1	1	0	0	0	0			Yes	Yes		589580997	1c3d6862-c186-4bd6-bf1d-f6a1abcff211	2025-10-23 23:08:14			submitted_via_web		vjPvJRHBMydrYcpAtB4ohd		uuid:1c3d6862-c186-4bd6-bf1d-f6a1abcff211	334
2025-10-23 22:48:20	2025-10-24 08:59:46	37	Married	Tertiary	Health worker	Christianity	Rural	Yes	Community leader	Yes	Government subsidy	Yes	Antenatal care	1	0	0	0	0	Yes	15	Fully	Health center	Yes	Fully	Yes	Lack of awareness Distance to facility Transport cost	1	1	1	0	0	0	0		Satisfied	Yes	Yes		589790981	0ab5a5cd-bf53-46b7-98a7-22b1beb097e5	2025-10-24 07:59:47			submitted_via_web		vjPvJRHBMydrYcpAtB4ohd		uuid:0ab5a5cd-bf53-46b7-98a7-22b1beb097e5	335
2025-10-24 08:59:46	2025-10-24 09:00:56	19	Married	Secondary	Business woman	Christianity	Rural	Yes	Friends/family	Yes	Employer	Yes	Postnatal care	0	0	0	1	0	Yes	10	Fully	Health center	Yes	Fully	Yes	Distance to facility	0	1	0	0	0	0	0		Very satisfied	Yes	Yes	No	589791538	91256804-a9a2-4152-a43b-b398c0beb544	2025-10-24 08:00:58			submitted_via_web		vjPvJRHBMydrYcpAtB4ohd		uuid:91256804-a9a2-4152-a43b-b398c0beb544	336
2025-10-24 09:00:56	2025-10-24 09:03:08	30	Married	Tertiary	Nurse	Christianity	Rural	Yes	Health facility	Yes	Government subsidy	Yes	Antenatal care Postnatal care	1	0	0	1	0	Yes	16	Fully	Health center	Yes	Fully	Yes	Distance to facility	0	1	0	0	0	0	0		Very satisfied	Yes	Yes	No	589792974	0b12854b-9f19-494d-8800-e77e5f50f482	2025-10-24 08:03:09			submitted_via_web		vjPvJRHBMydrYcpAtB4ohd		uuid:0b12854b-9f19-494d-8800-e77e5f50f482	337
2025-10-24 09:03:08	2025-10-24 09:04:29	38	Married	Secondary	Farmer	Christianity	Rural	Yes	Health facility	Yes	Government subsidy	Yes	Antenatal care	1	0	0	0	0	Yes	15	Fully	Health center	Yes	Fully	Yes	Lack of awareness Distance to facility	1	1	0	0	0	0	0		Satisfied	Yes	Yes	No	589794055	02c264d3-7e50-413a-a5ab-6e3eb8b6ff94	2025-10-24 08:04:30			submitted_via_web		vjPvJRHBMydrYcpAtB4ohd		uuid:02c264d3-7e50-413a-a5ab-6e3eb8b6ff94	338
2025-10-24 09:04:30	2025-10-24 09:05:56	25	Married	Secondary	Trader	Christianity	Rural	Yes	Health facility	Yes	Government subsidy	Yes	Antenatal care	1	0	0	0	0	Yes	16	Fully	Health center	Yes	Fully	Yes	Lack of awareness Distance to facility	1	1	0	0	0	0	0		Satisfied	Yes	Yes		589795366	1d622f7f-0a22-41b0-9989-aa04f76de1ea	2025-10-24 08:05:56			submitted_via_web		vjPvJRHBMydrYcpAtB4ohd		uuid:1d622f7f-0a22-41b0-9989-aa04f76de1ea	339
2025-10-24 09:05:56	2025-10-24 09:06:51	32	Married	Secondary	Traders	Christianity	Rural	Yes	Health facility	Yes	Government subsidy	Yes	Antenatal care	1	0	0	0	0	Yes	10	Fully	Health center	Yes	Fully		Distance to facility Transport cost	0	1	1	0	0	0	0		Satisfied	Yes	Yes		589796014	ec171987-1ff3-4c2c-a8bc-16273b130328	2025-10-24 08:06:52			submitted_via_web		vjPvJRHBMydrYcpAtB4ohd		uuid:ec171987-1ff3-4c2c-a8bc-16273b130328	340
2025-10-24 09:06:51	2025-10-24 09:07:53	32	Married	Secondary	Farmer	Christianity	Rural	Yes	Health facility	Yes		Yes	Antenatal care	1	0	0	0	0	Yes	15	Fully	Health center	Yes	Fully	Yes	Distance to facility Transport cost	0	1	1	0	0	0	0		Satisfied	Yes	Yes		589796774	7068dbcb-3639-4b44-9008-73481fbbccbf	2025-10-24 08:07:53			submitted_via_web		vjPvJRHBMydrYcpAtB4ohd		uuid:7068dbcb-3639-4b44-9008-73481fbbccbf	341
2025-10-24 09:07:53	2025-10-24 09:09:25	25	Married		Business	Christianity	Rural	Yes	Health facility	Yes	Government subsidy	Yes	Antenatal care	1	0	0	0	0	Yes	12	Fully	Health center	Yes	Fully	Yes	Lack of awareness Distance to facility	1	1	0	0	0	0	0		Satisfied	Yes	Yes		589797721	07aa7bbe-162e-4034-aafe-a61c32da637a	2025-10-24 08:09:26			submitted_via_web		vjPvJRHBMydrYcpAtB4ohd		uuid:07aa7bbe-162e-4034-aafe-a61c32da637a	342
2025-10-24 09:09:25	2025-10-24 09:10:16	29	Single	Primary	Trader	Christianity	Rural	No		No		No							Yes	5	Not at all	Others	No	Not at all	No											Yes	Yes		589798283	af5fdbd8-f6ca-4bb3-a5e2-b5436d456666	2025-10-24 08:10:16			submitted_via_web		vjPvJRHBMydrYcpAtB4ohd		uuid:af5fdbd8-f6ca-4bb3-a5e2-b5436d456666	343
2025-10-24 09:10:16	2025-10-24 09:14:09	35	Married	Tertiary	Teacher	Christianity	Rural	Yes	Health facility	Yes	Government subsidy	Yes	Antenatal care	1	0	0	0	0	Yes	13	Fully	Health center	Yes	Fully	Yes	Distance to facility Transport cost Stock out of medicine	0	1	1	0	1	0	0		Satisfied	Yes	Yes		589800982	1fa98e8c-e527-4ae9-8992-f5af66324953	2025-10-24 08:14:16			submitted_via_web		vjPvJRHBMydrYcpAtB4ohd		uuid:1fa98e8c-e527-4ae9-8992-f5af66324953	344
