# Supplementary material
Source: Research Square preprint supplement (doi:10.21203/rs.3.rs-9186301/v1)
Supplement: Supplementary file 1 [file b2e594a07dd321e06aa729b6.docx]

| **Theme** | **Sub-theme** | **Representative Quote** |
| --- | --- | --- |
| 1. **Role and Experience of IMSHIA Staff in Maternal Health Services** | 1.1 Leadership and Oversight | “We accredit health care providers coming into the scheme to provide quality healthcare services, we monitor them on the implementation of the service provisions and other IMSHIA administrative protocols. It has been a wonderful and robust experience for me, the department and the agency.” (Head, SQA, IMSHIA, 2025) |
|  | 1.2 Direct Implementation at Facility Level | “Before we started implementing this program in Imo State, these women considered poor and vulnerable didn’t have access to maternal health services… Given the implementation of the health insurance, they go to primary health care facilities to access maternal services without any fear of payment.” (Technical Assistant, IMSHIA, 2025) |
| 1. **Awareness of IMSHIA Maternal Health Services** | 2.1 General Awareness among Women of Reproductive Age | “Most pregnant women and expectant mothers are already very much aware, and they come on their own to enquire and register so that they can give birth under this program.” (Head, CMU, IMSHIA, 2025) |
|  | 2.2 Baseline Assessments and Targeted Awareness | “Prior to commencement, we did a baseline assessment, looked at the facilities across the three hundred and five INEC wards… We invited all the Ward Development Committee members to the State capital for orientation and sensitization about the program.” (Head, S&QA, IMSHIA, 2025) |
| 1. **Strategies Used to Promote IMSHIA Maternal Health Services** | 3.1 Grassroots Engagement | “The strategy initially was to move to churches and inform them, go to markets, sensitize them and ask them to use their register to call people.” (OIC, Area M, 2025) |
|  | 3.2 Media and Digital Platforms | “They have created so many strategies ranging from radio talks, seminars, flyers, even coming down to the communities where they educate people in the community… it is just like a network. People who access service now will go and tell others that, ‘Ah, this is real.’” (Implementer, IMSHIA, 2025) |
|  | 3.3 Facility-Based Sensitization | “Through the facilities, other women who are beneficiaries, their friends and relatives… will tell them about IMSHIA and when they come to the facility, they will ask, ‘We heard something about IMSHIA, is it true?’” (DO, NSSH, 2025) |
| 1. **Utilization of Antenatal Care (ANC) Services** | 4.1 Early and Regular ANC Attendance | “Those of them on IMSHIA tend to register as early as possible when they’re pregnant and they come to the health facilities at will because they know that they are not going to pay a farthing.” (OIC, Eziama, 2025) |
|  | 4.2 Confidence and Financial Protection | “The antenatal care has so much improved, especially for the enrollees. They come into it with confidence and boldness as there is no strain on their finances.” (Implementer, IMSHIA, 2025) |
| 1. **Skilled Delivery and Emergency Obstetric Care** | 5.1 Increased Utilization of Skilled Birth Attendants | “Many people now come to these facilities to give birth instead of doing it at home or going to untrained traditional birth assistants to give birth.” (Head, CMU, IMSHIA, 2025) |
|  | 5.2 Preparedness and Referral Systems | “We always prepare for emergency… Most times, we give referrals for cesarean sections, for other interventions and the emergency obstetric needs that we attend to even without wasting time… within five to ten minutes, intervention is carried out.” (Implementer, IMSHIA, 2025) |
|  | 5.3 Maternal and Infant Mortality Reduction | “The level of enrollment, deliveries, assisted deliveries, including cesarean sections has shown significantly that IMSHIA is doing a fantastic job in ensuring that there is a reduction of maternal and infant deaths, specifically in rural areas, local communities and the hard-to-reach areas.” (ES, IMSHIA, 2025) |
| 1. **Differences in Maternal Health Outcomes between Enrollees and Non-Enrollees** | 6.1 Financial Barriers and Service Uptake | “Non-IMSHIA enrollees pay out of pocket… They consider cost before they agree to healthcare services… IMSHIA enrollees walk in and they already know what’s obtainable, they receive their services at no cost.” (Implementer, IMSHIA, 2025) |
|  | 6.2 Early Registration and Compliance | “The enrolled patients tend to take these services more seriously… Even when it comes to scans, most of them always do their scan as at when due because they know there is no extra expense.” (Head, CMU, IMSHIA, 2025) |
|  | 6.3 Improved Maternal Health Indicators | “There is a lot of difference in maternal health outcomes between the enrollees and non-enrollees because those that are not enrolled mostly go to the traditional birth attendants… we end up losing some of the non-enrolled women.” (Commissioner, 2025) |
| 1. **Barriers to Accessing IMSHIA Maternal Health Services** | 7.1 Cultural Beliefs and Practices | “Some people still do not believe in going to the hospital to give birth… They’ll prefer to go to traditional birth attendants whom they believe and trust more than the health centers.” (Head, CMU, IMSHIA, 2025) |
|  | 7.2 Geographical Barriers | “The terrain is also a challenge… the remaining communities within that ward are in diverse, hard-to-reach environments and the people are cut off by poor terrain, valleys and hills.” (Head, S&QA, IMSHIA, 2025) |
|  | 7.3 Financial and Administrative Barriers | “Most of these pregnant women do not even have money to leave their house and go to the health center that is closest to them.” (Head, CMU, IMSHIA, 2025) |
| 1. **Facilitators of Effective Utilization of IMSHIA Services** | 8.1 Financial Risk Protection | “The major factor that have actually encouraged these women to utilize these services is the fact that it actually takes a chunk of load, especially financial burden off their shoulders… Your baby will be taken care of for the next twelve weeks.” (DA&LI, 2025) |
|  | 8.2 Accessibility and Proximity | “The factor is that it is brought to them at their doorstep. It is in the rural health centers… and when it is beyond the health care providers in the rural areas, they are referred and because they don’t pay.” (Head, S&D, IMSHIA, 2025) |
|  | 8.3 Quality of Care and Skilled Providers | “Every January, we take time to train the men and women handling these cases… Skilled birth deliveries has been on the high side and women now know that during antenatal services and deliveries, if challenges are identified, there is a likelihood of getting a solution from the IMSHIA program.” (ES, IMSHIA, 2025) |
|  | 8.4 Information and Community Awareness | “Once these women have this information… they see those who enrolled in their community having cesarean section without payments, going for antenatal without any payment, delivering their babies safely without any payment and that encourages them to enroll.” (Commissioner, 2025) |
| 1. **IMSHIA’s Contribution to Maternal Mortality Reduction** | 9.1 Improved Access to Skilled Delivery and Referral Systems | “From Point A where they notice that there are complications to Point B which is a secondary facility less than thirty minutes’ drive… IMSHIA takes care of the bills… this has contributed in reducing maternal deaths in Imo State.” (Head, CMU, IMSHIA, 2025) |
|  | 9.2 Financial Protection and Risk Reduction | “Some people that have high-risk delivery… we were able to identify them… they get to access that care without payment, free of charge with IMSHIA.” (DO, NSSH, 2025) |
|  | 9.3 Evidence-Based Tracking and Monitoring | “The indicators and evidence are very much available in the data center… every OIC reports back to the agency where the data is collected and analyzed.” (Head, S&QA, IMSHIA, 2025) |
| 1. **Recommendations for Enhancing Coverage and Awareness** | 10.1 Expanded Enrollment and Facility Coverage | “The more people we enroll into the program, the more people we can help. Also, getting more health facilities into the system… access to care easier on them.” (Head, CMU, IMSHIA, 2025) |
|  | 10.2 Increased Awareness and Community Sensitization | “They need to create more awareness about IMSHIA especially to the villagers where there is no much means of communication… even if it’s a flyer.” (DO, NSSH, 2025) |
|  | 10.3 Strengthening Policy, Legislation, and Resource Allocation | “We can enhance our benefit package, add more services… engage stakeholders, philanthropists and donor agencies… government would also provide equity funds… maternal mortality rate will drastically reduce.” (Head, S&QA, IMSHIA, 2025) |
|  | 10.4 Sustaining Technical and Political Commitment | “The Imo State Health Insurance Agency enjoins the robust political will of the state government and the technical capacity of the leadership of the agency… if the political will is not there… maternal mortality rate will increase.” (Head, S&QA, IMSHIA, 2025) |
