# Supplementary material
Source: Research Square preprint supplement (doi:10.21203/rs.3.rs-9186301/v1)
Supplement: Supplementary file 2 [file f59416cb2ea8073fe0507171.docx]

IMSHIA referral nexus is spread across four zones

1. Orlu 1
2. Orlu 2
3. Okigwe
4. Owerri

With a target of achieving “knife on skin” intervention within 45 minutes of referral especially for emergency obstetric cases. Through this referral nexus, beneficiaries have recorded over 3,000 successful surgeries, including caesarean sections, hernia & fibroid surgeries, specialized internal medicine treatments, management of complicated hypertension, safe evacuation procedures and other critical emergency interventions. <https://web.facebook.com/reel/1329159242373459>

Nurse Chigbu Loveda (oic akagboye centre from ikeduru LGA) expressed her gratitude to prof (dr) Uchenna Ewelike for the yearly life-saving skills training. She specifically mentioned the most recent training where they were taught on the management of post-partum hemorrhage using tetraxemic acid injection. <https://web.facebook.com/reel/892435550305151>

The IMSHIA maternal mortality reduction program is designed to bring hope, safety and access to quality healthcare to pregnant women in Imo state, ensuring an end to preventable deaths and complications during child birth. So far, over 12,000 pregnant women have been enrolled into the maternal mortality reduction program and are receiving adequate maternal care including unhindered access to ANC services, timely referral for specialist care and secondary management, free and safe delivery services and post-natal care at no cost. As a result of this maternal mortality reduction program, IMSHIA did not record a single maternal death in 2025, a record the agency is determined to sustain through 2026 and beyond. This maternal health success is driven by the empathic leadership of the governor of Imo state, dist.sen.dr. Hope Uzodinma and the pragmatic leadership of Dr. Uchenna Ewelike, ES/CEO, IMSHIA. <https://web.facebook.com/reel/1526576645111253>

The Imo state government launched a comprehensive training program for healthcare officers to enhance service delivery and quality insurance in primary healthcare. The executive secretary, IMSHIA, Dr. Uche Ewelike says, “The capacity-building workshop is focusing on improving efficiency, reducing medical errors and strengthening the basic healthcare provision fund implementation. Dr.Ewelike further said that the c Da Q`1training also seeks to address the urgent need to enhance skills in primary healthcare management and reduce mortality rate from wrong diagnosis. <https://web.facebook.com/reel/858807400358058>

NHIA has a mandate to ensure good, quality healthcare services in the country. There are over 700,000 people who are in need of health insurance in Imo state. This is a testament to the commitment of the governor of Imo state, Sen. Hope Uzodinma and the executive secretary of the Imo state health insurance agency, IMSHIA to ensure that all citizens of the state have financial access to healthcare. <https://web.facebook.com/reel/1378494390189587>

In a bold move to improve healthcare for expectant mothers, the Imo state health insurance agency (IMSHIA), under the visionary leadership of his Excellency, distinguished senator (dr) Hope Uzodinma has embarked on an ambitious initiative on ending maternal mortality in LGAs in Imo state. The 3.1 enrollment drive aims to enroll all pregnant women in Imo state, ensuring they receive comprehensive healthcare coverage and access to quality medical services. The enrollment drive commenced on August 11th, 2025. This marks a significant milestone in the state’s healthcare journey. This initiative is being driven by the Imo state health insurance agency (IMSHIA), ably led by the executive secretary and CEO, Dr. Uchenna Ewelike. The Imo state health insurance agency is working tirelessly to ensure that every pregnant woman in the state has access to quality healthcare and free from financial burdens. Imo state health insurance agency 3.1 enrollment drive is ongoing in all 27 LGAs of the state. These include, Aboh Mbaise, obowo,owerri west,owerri municipal, mbatolu, ikeduru,orlu,orsu, oru east, oru west, njaba, nkwere, nwangele, ngor-okpala, isiala-mbano,ideato north,ideato south,isu, ehime-mbano,ahiazu-mbaise,oguta,ohaji-egbema,okigwe and onuimo where pregnant women are registering for comprehensive healthcare coverage. <https://web.facebook.com/reel/1486697099022521>

The Imo state health insurance agency concluded a BHCPF 3.1 enrollment for vulnerable women in the 305 INEC wards in Imo state. This started on August 11th, 2025. During this exercise, a total of 12,225 pregnant women were successfully enrolled for free and will be protected irrespective of their mode of delivery. This is the directive of the Imo state governor his Excellency, Dist.Sen Hope Uzodinma that no woman should die while giving birth to another life. The Agency’s strategy is yielding success exponentially and the data speaks to it. In the just concluded 2023/2024 national demographic and health survey (NDHS), Imo state was rated 97.2% on deliveries by skilled birth attendants, which is the highest in the entire southeast region and amongst the highest in the country. Due to the high impact referral nexus, assisted deliveries are improving as more pregnant women are safe from avoidable death related to pregnancy complications. Reducing maternal mortality is an intentional act of political will and must be sustained with good technical strategies which is the benchmark as the target is zero maternal mortality by the end of 2027. <https://web.facebook.com/reel/785249834192473>
